# Supplementary material for: Mesoscale Metabolic Channeling Revealed by Multimodal Microscopy
Source: Research Square preprint supplement (doi:10.21203/rs.3.rs-4096781/v1), 2024-04-17
Supplement: Supplementary file 2 [file 55a202b19f24586b1d95621e.xlsx]

## Sheet: Sheet1
Samples
Names	mfa-18-23 tbdms_716:-10	mfa-18-23 tbdms_716:-10	mfa-18-23 tbdms_716: 1 hrs	mfa-18-23 tbdms_716: 1 hrs	mfa-18-23 tbdms_716: 2 hrs	mfa-18-23 tbdms_716: 2 hrs	mfa-18-23 tbdms_716: 4 hrs	mfa-18-23 tbdms_716: 4 hrs	mfa-18-23 tbdms_717:-10	mfa-18-23 tbdms_717:-10	mfa-18-23 tbdms_717: 1 hrs	mfa-18-23 tbdms_717: 1 hrs	mfa-18-23 tbdms_717: 2 hrs	mfa-18-23 tbdms_717: 2 hrs	mfa-18-23 tbdms_717: 4 hrs	mfa-18-23 tbdms_717: 4 hrs	mfa-18-23 tbdms_718:-10	mfa-18-23 tbdms_718:-10	mfa-18-23 tbdms_718: 1 hrs	mfa-18-23 tbdms_718: 1 hrs	mfa-18-23 tbdms_718: 2 hrs	mfa-18-23 tbdms_718: 2 hrs	mfa-18-23 tbdms_718: 4 hrs	mfa-18-23 tbdms_718: 4 hrs	mfa-18-23 tbdms_719:-10	mfa-18-23 tbdms_719:-10	mfa-18-23 tbdms_719: 1 hrs	mfa-18-23 tbdms_719: 1 hrs	mfa-18-23 tbdms_719: 2 hrs	mfa-18-23 tbdms_719: 2 hrs	mfa-18-23 tbdms_719: 4 hrs	mfa-18-23 tbdms_719: 4 hrs	mfa-18-23 tbdms_720:-10	mfa-18-23 tbdms_720:-10	mfa-18-23 tbdms_720: 1 hrs	mfa-18-23 tbdms_720: 1 hrs	mfa-18-23 tbdms_720: 2 hrs	mfa-18-23 tbdms_720: 2 hrs	mfa-18-23 tbdms_720: 4 hrs	mfa-18-23 tbdms_720: 4 hrs	mfa-18-23 tbdms_721:-10	mfa-18-23 tbdms_721:-10	mfa-18-23 tbdms_721: 1 hrs	mfa-18-23 tbdms_721: 1 hrs	mfa-18-23 tbdms_721: 2 hrs	mfa-18-23 tbdms_721: 2 hrs	mfa-18-23 tbdms_721: 4 hrs	mfa-18-23 tbdms_721: 4 hrs	mfa-18-23 tbdms_std1:0.15625
GCMS ID	101121	102122	201032	202033	301037	302038	401040	402041	501043	502044	601124	602047	701049	702050	801052	802053	901055	902056	1001058	1002059	1101061	1102062	1201127	1202128	1301067	1302068	1401070	1402071	1501073	1502074	1601076	1602077	1701079	1702080	1801082	1802083	1901085	1902086	2001088	2002089	2101091	2102092	2201094	2202095	2301130	2302131	2401100	2402134	2501014
Retention Times (min.)
Ala	13.61	13.61	13.62	13.62	13.61	13.62	13.62	13.62	13.61	13.62	13.61	13.61	13.61	13.62	13.62	13.61	13.61	13.61	13.62	13.61	13.61	13.61	13.61	13.61	13.62	13.61	13.61	13.62	13.61	13.61	13.61	13.62	13.62	13.62	13.62	13.61	13.61	13.61	13.62	13.61	13.62	13.62	13.61	13.61	13.61	13.61	13.61	13.61	13.62
Asp	0	0	26.86	26.86	26.85	26.86	26.85	26.85	26.85	26.85	0	26.86	26.86	26.85	26.86	26.86	26.85	26.86	26.86	26.86	26.86	26.86	0	0	26.85	26.86	0	0	0	0	0	26.86	26.86	26.86	0	0	0	0	0	0	26.87	26.86	26.85	26.86	0	0	26.85	26.86	26.87
Cit	37.48	37.47	37.49	37.49	37.48	37.49	37.48	37.49	37.47	37.49	37.47	37.48	37.48	37.48	37.48	37.47	37.47	37.47	37.48	37.48	37.48	37.48	37.47	37.48	37.49	37.5	37.48	37.48	37.48	37.48	37.47	37.48	37.48	37.48	37.47	37.48	37.48	37.48	37.48	37.49	37.48	37.48	37.48	37.48	37.48	37.47	37.47	37.46	37.49
aKG	23.77	23.77	23.77	23.77	23.77	23.77	23.77	23.77	23.77	23.77	23.77	23.77	23.77	23.77	23.77	23.77	23.77	23.77	23.77	23.77	23.77	23.77	23.77	23.77	23.77	23.77	23.77	23.77	23.77	23.77	23.77	23.77	23.77	23.77	23.77	23.77	23.77	23.77	23.77	23.77	23.77	23.77	23.77	23.77	23.77	23.77	23.77	23.77	23.77
Gln	32.4	32.4	32.4	32.4	32.4	32.4	32.4	32.4	32.4	32.4	32.4	32.4	32.4	32.4	32.4	32.4	32.4	32.4	32.4	32.4	32.4	32.4	32.4	32.4	32.4	32.4	32.4	32.4	32.4	32.4	32.4	32.4	32.4	32.4	32.4	32.4	32.4	32.4	32.4	32.4	32.4	32.4	32.4	32.4	32.4	32.4	32.4	32.4	32.4
Glu	29.33	29.32	29.34	29.33	29.33	29.33	29.33	29.33	29.33	29.33	29.33	29.32	29.33	29.33	29.33	29.33	29.33	29.32	29.33	29.32	29.33	29.32	29.33	29.32	29.32	29.32	29.33	29.33	29.33	29.32	29.32	29.33	0	0	0	0	29.33	29.32	0	0	29.33	29.32	29.33	29.33	29.32	29.32	29.32	29.32	29.34
Glycerol	20.84	20.84	20.84	20.84	20.84	20.84	20.84	20.84	20.84	20.84	20.84	20.84	20.84	20.84	20.84	20.84	20.84	20.84	20.84	20.84	20.84	20.84	20.84	20.84	20.84	20.84	20.84	20.84	20.84	20.84	20.84	20.84	20.84	20.84	20.84	20.84	20.84	20.84	20.84	20.84	20.84	20.84	20.84	20.84	20.84	20.84	20.84	20.84	20.84
G3P	36.59	36.59	36.59	36.59	36.59	36.59	36.59	36.59	36.59	36.59	36.59	36.59	36.59	36.59	36.59	36.59	36.59	36.59	36.59	36.59	36.59	36.59	36.59	36.59	36.59	36.59	36.59	36.59	36.59	36.59	36.59	36.59	36.59	36.59	36.59	36.59	36.59	36.59	36.59	36.59	36.59	36.59	36.59	36.59	36.59	36.59	36.59	36.59	36.59
Lac	12.78	12.78	12.8	12.8	12.78	12.8	12.8	12.79	12.76	12.78	12.76	12.76	12.78	12.79	12.77	12.77	12.76	12.76	12.77	12.77	12.78	12.78	12.76	12.77	12.79	12.79	12.78	12.78	12.78	12.78	12.77	12.78	12.8	12.8	12.79	12.78	12.78	12.78	12.78	12.78	12.8	12.8	12.78	12.78	12.77	12.76	12.78	12.79	12.77
Mal	25.96	25.94	25.96	25.95	25.96	25.96	25.95	25.96	25.95	25.95	25.95	25.96	25.96	25.96	25.96	25.97	25.96	25.96	25.95	25.96	25.96	25.95	25.95	25.96	25.95	25.96	25.96	25.95	25.95	25.96	25.95	25.95	25.96	25.96	25.96	25.96	25.95	25.96	25.96	25.98	25.95	25.95	25.96	25.95	25.95	25.95	25.94	25.95	25.97
Pyr	9.28	9.27	9.31	9.31	9.26	9.31	9.31	9.31	9.25	9.28	9.25	9.26	9.28	9.31	9.27	9.27	9.26	9.25	9.31	9.31	9.31	9.31	9.28	9.31	9.31	9.31	9.31	9.31	9.31	9.3	9.27	9.31	9.31	9.31	9.31	9.31	9.31	9.31	9.31	9.31	9.31	9.31	9.31	9.31	9.3	9.28	9.27	9.25	9.31
Ser	23.29	23.29	23.29	23.29	23.29	23.29	23.29	23.29	23.29	23.29	23.29	23.29	23.29	23.29	23.29	23.29	23.29	23.29	23.29	23.29	23.29	23.29	23.29	23.29	23.29	23.29	23.29	23.29	23.29	23.29	23.29	23.29	23.29	23.29	23.29	23.29	23.29	23.29	23.29	23.29	23.29	23.29	23.29	23.29	23.29	23.29	23.29	23.29	23.29
Suc	18.13	18.13	18.13	18.13	18.13	18.13	18.13	18.13	18.13	18.13	18.13	18.13	18.13	18.13	18.13	18.13	18.13	18.13	18.13	18.13	18.13	18.13	18.13	18.13	18.13	18.13	18.13	18.13	18.13	18.13	18.13	18.13	18.13	18.13	18.13	18.13	18.13	18.13	18.13	18.13	18.13	18.13	18.13	18.13	18.13	18.13	18.13	18.13	18.13
Fum	18.78	18.78	18.78	18.78	18.78	18.78	18.78	18.78	18.78	18.78	18.78	18.78	18.78	18.78	18.78	18.78	18.78	18.78	18.78	18.78	18.78	18.78	18.78	18.78	18.78	18.78	18.78	18.78	18.78	18.78	18.78	18.78	18.78	18.78	18.78	18.78	18.78	18.78	18.78	18.78	18.78	18.78	18.78	18.78	18.78	18.78	18.78	18.78	18.78
Urea	15.9	15.9	15.9	15.9	15.9	15.9	15.9	15.9	15.9	15.9	15.9	15.9	15.9	15.9	15.9	15.9	15.9	15.9	15.9	15.9	15.9	15.9	15.9	15.9	15.9	15.9	15.9	15.9	15.9	15.9	15.9	15.9	15.9	15.9	15.9	15.9	15.9	15.9	15.9	15.9	15.9	15.9	15.9	15.9	15.9	15.9	15.9	15.9	15.9
Norvaline	16.26	16.26	16.27	16.27	16.26	16.26	16.26	16.26	16.23	16.26	16.23	16.23	16.26	16.26	16.26	16.26	16.23	16.23	16.26	16.26	16.26	16.26	16.25	16.25	16.26	16.26	16.25	16.25	16.25	16.25	16.25	16.25	16.26	16.26	16.26	16.26	16.26	16.26	16.26	16.26	16.26	16.26	16.26	16.25	16.25	16.25	16.21	16.22	16.26
Total ion counts		highlighted in red if less than 250,000
Ala 260	17962915	16554456	23748700	23865049	14479230	25340147	29020022	28986064	6367983	17034028	5334249	3699571	11698020	15582287	17658593	15432835	2916516	2717948	9015199	8943274	9009525	8903575	10879214	13105622	8892197	8732371	6522135	6585522	6288840	6220375	4338060	6546701	12291896	11982963	13475053	13381277	11615308	11483395	13253982	13092148	14862043	14629451	10328283	10272422	9466286	7603629	3389063	4663906	14463643
Ala 232	19575596	18429230	27461285	27586918	16987479	29275260	33349673	33264160	7450552	19770008	5484280	4395010	13711707	18098554	20515792	18009979	3387936	3173304	10506756	10353369	10476088	10311217	12237996	14783034	10196123	10022381	7482833	7576069	7206543	7133414	4956521	7495378	13954622	13577079	15265662	15163417	13189650	12989079	14999641	14786872	16693209	16485985	11691113	11628092	10639653	8551528	3528107	4793703	17062510
Asp 302	0	0	157861	157884	75680	152689	124174	122490	64100	147755	0	55479	154626	158672	173136	127512	203708	175295	338516	223887	385563	271422	0	0	370970	298375	0	0	0	0	0	419813	401250	311906	0	0	0	0	0	0	477569	400368	550883	400453	0	0	139265	200411	22829834
Asp 390	0	0	59007	59828	28362	55558	53738	53527	21773	52572	0	15004	55960	58001	59196	38478	62951	54014	82135	59480	87885	66892	0	0	104586	86752	0	0	0	0	0	89744	95795	74835	0	0	0	0	0	0	135238	115866	110283	86998	0	0	36058	57271	8091259
Asp 418	0	0	146797	160019	69227	137107	141205	144430	54486	124104	0	94604	237009	180726	247925	184144	232359	203740	632804	363945	765413	480235	0	0	627481	415434	0	0	0	0	0	894845	859515	659558	0	0	0	0	0	0	915393	689150	1300552	788558	0	0	184103	303445	17495537
Cit 459	8244250	8494796	26912667	27302413	9772615	17603491	12658272	12678696	6246021	18365335	1312666	2645415	7452192	11360690	7204879	6807085	2175680	2653048	11834614	13183009	11116854	11953009	5303834	8438718	25983337	27789980	9031901	9946852	8868854	9684395	5451797	11245786	9659184	10021187	8313482	9282995	10559961	12158843	6771192	7177716	13840912	15548736	8722222	10015164	7413285	6060635	219744	643324	21350213
aKG 346	136357	131555	441590	464427	156489	333098	207593	211060	58042	204973	31681	39786	155717	250578	106642	104569	218283	252934	1142592	1230802	1384885	1433543	273559	440312	4240220	4336169	1859119	2018612	2008493	2133851	1118141	2282403	127099	127973	200094	207786	126587	141852	107150	129243	1585327	1680063	688648	786566	786313	589560	29226	64280	16609121
Gln 431	1620895	1323655	7912618	7839461	3239802	7390283	8332130	7958311	1267367	2977396	911803	1864348	6279545	5508260	10566821	6255962	791874	508846	4350848	4564264	3352815	3402270	3516011	4557101	2204821	2201471	2519729	2551493	2062199	1974771	3863422	7659401	711305	705398	1887303	1987625	6237653	6181386	2618601	2739241	1205685	1177805	3165615	3338755	3139099	2128747	588237	751424	882649
Glu 330	604341	551066	704738	732712	343317	688587	645566	649735	177678	520016	201153	168935	553130	708499	556381	455469	151189	135590	559457	545622	567955	556772	532592	569485	820730	795201	432580	422026	499859	477992	512561	854304	0	0	0	0	509714	479472	0	0	661498	648872	506451	513522	675385	514191	234313	383208	16442218
Glu 432	886219	816003	1010013	1042813	495137	952392	923984	927462	260525	728210	275665	232432	755164	944677	775464	637596	211041	185650	784855	759016	797634	796037	633085	789557	1178273	1145133	600852	580484	705869	693343	739551	1203423	0	0	0	0	669080	640685	0	0	958653	951562	753379	749138	957838	742221	348798	587941	23939385
Glycerol 377	12283012	11557058	9910093	10003844	4871225	8249127	6818001	6885763	3166479	8490122	2223704	1145096	2183546	2908948	2452988	2277509	1663831	1708543	5118066	5177558	4092526	4085716	4587104	5666953	17312409	17086699	10283322	10462541	10548616	10517625	5981548	9027763	10914397	10650287	5942493	5916535	8860035	8728494	6992652	6862598	14594713	14420537	6776483	6757885	5849011	4623499	967581	1685201	3436906
G3P 571	531002	436344	230586	255345	80548	185671	150201	153735	61047	179038	99369	36971	134746	162448	116029	89161	38058	33012	160725	165875	134277	133646	220074	275182	308783	331956	154690	163390	167808	176003	138242	265727	150758	165628	160360	178702	192423	201857	141936	140376	222076	253137	162831	171095	243490	183182	173816	303371	5822537
Lac 233	39759319	37967162	60465337	60464997	42418268	58780210	53952276	53685303	19421056	42835438	13106158	11216860	33979819	41219221	24763524	23145381	15577979	15657785	22836580	22588409	33326031	32862408	16906355	20130930	50180317	49768444	33187545	33288172	38593506	38282066	23337629	32710916	57943630	56553590	41888355	41711786	35430387	34940498	34141234	33680355	59137641	58736737	36397779	36292240	26810242	21937801	63403644	76318577	8331200
Lac 261	67111261	64240285	100321770	100549659	72868251	98261433	91207369	90821454	33954478	72373125	23302243	19683728	59166053	71361857	43629263	40694880	27155511	27290672	40289364	39974514	58383345	57859077	30027697	35736252	84045460	83543889	58354856	58570329	67404680	66893062	41488152	57747251	95871744	93599397	72600378	72269880	62157114	61385049	60142402	59434117	97385518	96736057	63655751	63497429	46844514	38579529	106252490	123837951	14242500
Mal 391	21769	15521	21581	21669	7172	15447	10881	14078	5583	18193	1749	1005	10602	15637	5530	3712	17276	18482	40821	41637	42017	43060	18117	25459	215814	218847	59892	63208	58300	59591	33129	60179	14654	13081	11586	12087	9835	10799	6472	5217	115452	122303	32889	34814	29733	23573	3691	11246	1440191
Mal 419	327722	273584	327742	330271	132675	245559	223168	233761	99426	279391	49777	38457	186742	248807	123722	105217	273473	296608	632778	660214	662567	671723	277900	409845	3314702	3392154	901293	956388	894495	938747	499656	916354	215279	215476	186704	198661	174764	180792	90396	139069	1757890	1840796	514260	546038	476245	371475	91363	204573	21886050
Pyr 174	12819813	12277924	33237891	33666865	15921517	27031146	23865872	23921430	5521707	13644448	4019336	3626653	9678380	13034021	7918786	7551905	2880764	2928759	5584908	5633284	10080452	10054850	4827494	6095783	12567948	12460384	8937359	9027732	11098059	11047518	5048433	7776184	13238116	13028512	11670350	11765493	13643863	13648219	7877441	7825332	14516461	14487398	7439004	7565939	8079715	6497386	4095979	5668466	20122694
Ser 390	11384634	10486711	9297365	9470125	5450252	9849154	9790262	9806618	4008088	9929345	3547212	2654473	7111334	8413109	11909228	9324183	2451017	1889036	4576950	4556878	4521724	4490742	6113176	7411751	5354971	5244688	4241858	4259240	4015950	3943106	3110605	4812321	5690014	5552696	7169328	7118877	7315740	7044204	6685320	6474664	5512035	5404982	5248420	5208037	5291354	4163089	1726837	2020239	25552564
Suc 289	1955754	1309796	574482	617860	295132	461609	455395	453348	286421	674964	741221	130316	408580	485410	443496	326655	489576	446851	1308626	1129990	1308420	1138327	1502603	1361663	4025858	3780439	1760480	1531061	1506158	1339795	1098335	1392420	1114404	869145	764443	588138	891321	744176	765755	580434	2376947	2150780	1281372	1122023	1324337	908392	922321	1428546	32595947
Fum 287	3859840	2551900	545237	905213	148357	269057	1216163	1778052	867329	1157261	1389562	488630	1434316	1739591	1236160	740681	584668	617097	2536826	2279320	2818892	2469807	2907551	3092358	4245833	3740413	2602816	2193679	2705804	2464802	3088312	4232956	2730906	1994578	2066953	1610143	2495557	2353081	2159134	1726998	3400241	3256836	4139482	4169623	3196453	2495074	653826	983234	24213785
Urea 231	650317137	623953961	924163556	912980331	604699976	793348279	534995176	523622212	379793506	714689064	286298644	294390979	594960862	688639565	486584360	477973223	309909633	299124290	655102382	657481123	516502288	514010685	406740019	474969497	590149398	585319196	443136096	454034359	364958732	366412033	262778015	356302905	599778700	590468917	604559364	615581463	584684456	592188554	584256556	587370113	728025450	725541591	576725853	583194951	512799534	416084292	56613729	72276588	24090955
Norvaline 186	180065445	173770398	184341089	193545968	163499688	216558265	215431771	213580067	110264991	194694737	107266557	103827507	183711385	215274948	182221958	174148389	90943775	91148344	214141375	212233693	212889050	212213951	174195861	195168583	210635878	210549989	203304829	206148235	209789824	208490040	170327541	210565691	215018535	212403655	207072895	205825078	208631060	207791316	205696699	203678197	216264110	217583810	212618214	211787291	196134164	173189216	55689119	73905332	226082716
Norvaline 260	103414155	99090941	110612790	116190094	89077910	128923785	132233052	131189208	51853787	112229314	52759870	48284291	106148135	129862001	105273780	98527000	41429176	41568277	129506456	128056424	130073434	129224676	100913467	116961997	127933415	126472658	123483862	124933470	127515311	126406551	96957067	127964537	130721370	127850882	123353353	122617555	125785426	124663399	123616143	121854841	132413180	131838540	129829385	129199867	117749367	100051390	25049592	35283942	143802964
Norvaline 288	80101390	76881765	83550479	88299049	69871303	100551877	102855993	101944768	40734452	88177358	41882753	37797414	83130065	101295486	82416831	77285744	32337436	32337360	100934902	99921437	101408230	100803708	77951045	89889305	100161982	99204958	96620611	97701387	99629208	98776271	76688733	100018718	102351511	99994720	96799497	96020900	98239164	97627738	96693222	95268222	103110319	103026655	101227728	100680010	90319087	77308850	19838475	27940923	110197024
Mass isotopomer abundances
GCMS ID	101121	102121	201020	202021	301023	302024	401026	402027	501030	502031	601033	602034	701036	701123	801039	801126	901042	901129	1001045	1002046	1101048	1102049	1201051	1202052	1301054	1302055	1401057	1402058	1501060	1502061	1601063	1602064	1701066	1702067	1801069	1802070	1901072	1902073	2001075	2002076	2101003	2101078	2201081	2202082	2301084	2302085	2401087	2402088	2501002
Ala 260 (M0)	0.7415	0.7431	0.527	0.5269	0.4549	0.4532	0.3985	0.3989	0.7451	0.744	0.5436	0.5352	0.4367	0.4363	0.3796	0.3801	0.7445	0.743	0.5136	0.5126	0.4187	0.417	0.396	0.3945	0.7426	0.7428	0.5328	0.5342	0.4582	0.4577	0.4304	0.4323	0.745	0.7464	0.5044	0.5029	0.439	0.4396	0.3596	0.3593	0.744	0.7441	0.5221	0.5235	0.4679	0.4672	0.3729	0.3661	0.7443
Ala 261 (M1)	0.1752	0.1728	0.1503	0.1506	0.1512	0.1514	0.1504	0.1501	0.1708	0.1721	0.158	0.1459	0.1481	0.1467	0.1383	0.1373	0.1702	0.173	0.1439	0.1439	0.136	0.1364	0.1398	0.138	0.1701	0.1699	0.1523	0.1526	0.1584	0.158	0.159	0.1586	0.1712	0.1706	0.1485	0.1494	0.148	0.1476	0.1389	0.1388	0.1723	0.1721	0.1451	0.1442	0.1512	0.1516	0.1421	0.1427	0.1725
Ala 262 (M2)	0.0696	0.0703	0.0869	0.0867	0.098	0.098	0.1039	0.1043	0.0703	0.07	0.0809	0.08	0.0967	0.0971	0.0945	0.0943	0.0707	0.0706	0.0806	0.081	0.0882	0.0879	0.0906	0.0903	0.0702	0.0702	0.0885	0.0882	0.1033	0.1032	0.1054	0.1039	0.0707	0.0702	0.0872	0.0871	0.0957	0.0958	0.0981	0.0981	0.0702	0.0704	0.0808	0.0797	0.0958	0.096	0.1271	0.133	0.0707
Ala 263 (M3)	0.0117	0.0118	0.1837	0.1836	0.2305	0.2312	0.2694	0.2694	0.0117	0.0116	0.1691	0.1859	0.2479	0.2487	0.3013	0.3019	0.0123	0.0113	0.2043	0.2043	0.2782	0.2795	0.2898	0.2935	0.0144	0.0143	0.1767	0.1748	0.2176	0.2188	0.2369	0.2374	0.0111	0.0108	0.2024	0.2033	0.2466	0.2463	0.3137	0.3144	0.0114	0.0114	0.1963	0.1974	0.2215	0.2213	0.2759	0.2756	0.0107
Ala 264 (M4)	0.002	0.0021	0.0374	0.0374	0.0466	0.0472	0.0552	0.0551	0.0022	0.0021	0.034	0.0379	0.0504	0.0504	0.0611	0.0609	0.0023	0.0021	0.041	0.0411	0.056	0.0565	0.0595	0.0593	0.0026	0.0028	0.0352	0.036	0.045	0.0448	0.0491	0.049	0.002	0.002	0.0411	0.0411	0.0506	0.0503	0.0639	0.0633	0.0021	0.002	0.0395	0.0392	0.0455	0.0458	0.058	0.0588	0.0019
Ala 265 (M5)	0	0	0.0147	0.0148	0.0188	0.019	0.0226	0.0223	0	0.0001	0.0144	0.0151	0.0201	0.0208	0.0252	0.0255	0	0	0.0166	0.0171	0.023	0.0227	0.0244	0.0245	0	0	0.0144	0.0142	0.0175	0.0176	0.0192	0.0189	0	0	0.0165	0.0163	0.0201	0.0204	0.0258	0.0261	0	0	0.0162	0.016	0.0182	0.0181	0.0239	0.0238	0
Corrected Data
Ala 260 (M0)	0.995164	0.997213	0.705679	0.705522	0.608748	0.60643	0.532909	0.533441	0.999893	0.998587	0.727847	0.716591	0.584343	0.583638	0.507454	0.508088	0.999197	0.997168	0.687537	0.686093	0.559885	0.557721	0.529358	0.527383	0.996777	0.996935	0.713542	0.715336	0.613276	0.612548	0.575907	0.578451	0.999854	1.00173	0.675144	0.673189	0.587341	0.588095	0.480699	0.480274	0.998513	0.998652	0.698927	0.700867	0.626105	0.625239	0.498552	0.489408	0.99881
Ala 261 (M1)	0.0057023	0.00202633	0.038193	0.0386196	0.0613578	0.0621368	0.0774535	0.0769343	-0.00124048	0.000821889	0.0433207	0.0298586	0.0628017	0.061053	0.0671859	0.0657067	-0.00185357	0.00232262	0.0337969	0.0340969	0.0522426	0.0533003	0.0641686	0.0622492	-0.00140514	-0.0017317	0.0390767	0.0390422	0.0698946	0.069511	0.0791503	0.0780415	-0.000678971	-0.00190388	0.0426912	0.044344	0.0619593	0.0612419	0.0740721	0.0740277	0.00108734	0.000791233	0.0327922	0.0311761	0.0573879	0.0581375	0.074261	0.077119	0.00126093
Ala 262 (M2)	-0.00177425	-0.000255055	0.0403726	0.0400287	0.0587589	0.0587948	0.0699021	0.0704884	0.00020647	-0.000499037	0.0293409	0.032124	0.0589869	0.0599187	0.0621396	0.0621323	0.000939296	8.6975e-05	0.0347184	0.0352943	0.0523339	0.051934	0.0556656	0.0558792	0.000420883	0.000466995	0.0415664	0.0410019	0.0634512	0.0634579	0.0676052	0.0656475	0.000622201	5.80386e-05	0.0425637	0.0422632	0.0575667	0.0577734	0.0678198	0.0678624	-0.000294021	2.05319e-05	0.034148	0.0328887	0.055129	0.0553223	0.104086	0.11201	0.000287632
Ala 263 (M3)	0.00121696	0.00133433	0.216508	0.216405	0.272442	0.273282	0.319895	0.319811	0.00136601	0.00121675	0.199074	0.221637	0.295115	0.296032	0.363926	0.364802	0.00206073	0.000589564	0.244945	0.244779	0.336782	0.338552	0.350336	0.355301	0.00489137	0.00477708	0.207031	0.204637	0.253985	0.255556	0.277732	0.278849	0.000452246	0.000263127	0.240206	0.241333	0.293715	0.293311	0.378535	0.379422	0.000890649	0.000850536	0.234633	0.236461	0.261632	0.26131	0.321931	0.319739	-0.000159913
Ala 264 (M4)	3.20517e-05	4.67195e-05	-0.000117308	-7.32707e-05	-0.000989148	-0.000390167	-0.000295267	-0.000455119	0.000165577	0.000104489	-0.000222645	0.000326762	-0.000534704	-0.000793183	-0.000506126	-0.00092492	0.000103107	0.000160068	-0.000485129	-0.000382382	-0.000779203	-0.000440888	0.000668478	-0.00055653	-2.03009e-05	0.00026152	-0.00122565	0.000325503	5.8715e-05	-0.00051026	0.000259015	9.09983e-05	4.25373e-05	0.000141459	-0.00020739	-0.000416209	0.00012196	-0.000202963	-0.000303665	-0.00126148	0.000147263	9.1738e-07	-0.000353224	-0.000970273	5.1408e-05	0.000485454	-1.4318e-06	0.000740378	4.02622e-05
Ala 265 (M5)	-0.000341495	-0.00036529	-0.000634761	-0.000502234	-0.000317532	-0.000253887	0.000136386	-0.000219272	-0.000390323	-0.000231069	0.00064036	-0.000537585	-0.000711486	0.000150824	-0.000199334	0.000196046	-0.000446204	-0.000327336	-0.00051235	0.000118961	-0.000464255	-0.00106576	-0.000196699	-0.000255865	-0.0006638	-0.000709353	9.40225e-06	-0.00034237	-0.000666242	-0.000562975	-0.000653194	-0.00108034	-0.000292355	-0.000286067	-0.00039782	-0.000712349	-0.00070364	-0.000218835	-0.000822604	-0.000324741	-0.000343982	-0.000314741	-0.000146784	-0.000423379	-0.000305772	-0.000494133	0.00117212	0.000983307	-0.000238422
Atom Percent Enrichment	0.0019349	0.00183973	0.256154	0.255964	0.332067	0.333191	0.392314	0.392448	0.00109016	0.00115802	0.233075	0.253006	0.355373	0.356329	0.427748	0.428126	0.00206907	0.00142175	0.279356	0.279674	0.389085	0.390941	0.408836	0.413303	0.00470358	0.00451118	0.247768	0.244986	0.319584	0.321032	0.349185	0.348628	0.000640722	-0.000332808	0.282812	0.284289	0.352746	0.352241	0.448439	0.449339	0.00105708	0.00112797	0.268329	0.268779	0.317514	0.317571	0.416075	0.420119	0.00045215
Ala 232 (M0)	0.7519	0.7518	0.5432	0.5443	0.4745	0.4735	0.4214	0.4214	0.7526	0.7522	0.5489	0.5499	0.4602	0.4581	0.3996	0.4001	0.7516	0.7558	0.529	0.5268	0.4356	0.4365	0.4142	0.4138	0.7507	0.7506	0.5523	0.5505	0.482	0.4834	0.458	0.4604	0.754	0.7526	0.5209	0.5211	0.4621	0.4615	0.3832	0.3828	0.7528	0.7523	0.5363	0.5373	0.4868	0.4886	0.4041	0.4011	0.7534
Ala 233 (M1)	0.1675	0.1667	0.1496	0.149	0.1531	0.1531	0.155	0.1552	0.1665	0.1666	0.1449	0.1433	0.1483	0.1489	0.143	0.1427	0.1657	0.1651	0.142	0.1423	0.138	0.1372	0.1419	0.1416	0.1648	0.1651	0.1499	0.1494	0.157	0.1563	0.1596	0.1563	0.166	0.1673	0.1468	0.1472	0.1476	0.1476	0.1424	0.1425	0.1665	0.1666	0.1434	0.1431	0.1515	0.1511	0.1384	0.1395	0.1664
Ala 234 (M2)	0.069	0.0696	0.2409	0.241	0.2905	0.291	0.3288	0.3284	0.069	0.0693	0.2403	0.2397	0.3053	0.3063	0.355	0.3553	0.0701	0.0674	0.2579	0.2597	0.3328	0.3318	0.3444	0.3449	0.0719	0.0714	0.2342	0.2357	0.2826	0.2813	0.2979	0.299	0.0684	0.0684	0.2603	0.2592	0.3045	0.3042	0.3682	0.368	0.0691	0.0693	0.2517	0.2512	0.2821	0.2809	0.3548	0.3571	0.0686
Ala 235 (M3)	0.0098	0.0099	0.0466	0.0461	0.0571	0.0576	0.0661	0.0659	0.01	0.0099	0.0462	0.0464	0.0601	0.0603	0.0708	0.0706	0.0106	0.0099	0.0495	0.0497	0.0646	0.0651	0.0688	0.0691	0.0102	0.0106	0.0444	0.0452	0.0545	0.055	0.0588	0.0586	0.0098	0.0099	0.0499	0.0506	0.0598	0.0604	0.0735	0.0739	0.0098	0.0099	0.048	0.0476	0.0557	0.0556	0.071	0.0708	0.0097
Ala 236 (M4)	0.0017	0.0017	0.0174	0.0174	0.0219	0.022	0.0254	0.0256	0.0018	0.0018	0.0172	0.0183	0.0231	0.0234	0.0278	0.0276	0.002	0.0017	0.0192	0.0191	0.0256	0.026	0.0271	0.0272	0.0021	0.0021	0.017	0.0172	0.0212	0.0211	0.0228	0.0226	0.0016	0.0016	0.0196	0.0194	0.0231	0.0232	0.0291	0.0291	0.0017	0.0017	0.0183	0.0185	0.0211	0.021	0.0276	0.0277	0.0017
Ala 237 (M5)	0.0002	0.0002	0.0022	0.0022	0.0029	0.0028	0.0033	0.0033	0.0001	0.0002	0.0024	0.0024	0.003	0.003	0.0037	0.0036	0	0	0.0024	0.0025	0.0033	0.0034	0.0036	0.0033	0.0002	0.0002	0.0021	0.0021	0.0028	0.0028	0.0029	0.0032	0.0002	0.0002	0.0025	0.0025	0.0029	0.003	0.0037	0.0037	0.0002	0.0002	0.0024	0.0024	0.0028	0.0029	0.004	0.0038	0.0002
Corrected Data
Ala 232 (M0)	0.995614	0.995684	0.719152	0.720529	0.628041	0.62674	0.557727	0.557832	0.996671	0.99611	0.726658	0.727881	0.609112	0.606327	0.528879	0.529558	0.995382	1.00104	0.700244	0.697247	0.576568	0.577681	0.548154	0.547729	0.994221	0.993996	0.731197	0.728676	0.637902	0.639892	0.6062	0.609266	0.9985	0.996647	0.689493	0.689772	0.611641	0.610895	0.507077	0.506602	0.996807	0.996247	0.709836	0.711149	0.644341	0.646641	0.534796	0.5308	0.997699
Ala 233 (M1)	0.00354448	0.00252585	0.0400041	0.0388984	0.0642902	0.0645794	0.0820103	0.0822875	0.00203399	0.00227975	0.0322112	0.0298248	0.0621089	0.0634965	0.0725557	0.0720219	0.00127315	-0.000718829	0.0341216	0.0351416	0.055684	0.054371	0.0669204	0.0666552	0.000352548	0.000774209	0.037785	0.0376396	0.0672372	0.0659333	0.0775348	0.0725125	0.000977018	0.00308189	0.0427295	0.0431968	0.0606486	0.0608256	0.0764615	0.0767154	0.00197631	0.00225105	0.0338565	0.0331762	0.0586676	0.05762	0.0652375	0.067535	0.00167325
Ala 234 (M2)	0.00110383	0.00210321	0.240579	0.240781	0.307749	0.308465	0.359862	0.359357	0.00133367	0.00171831	0.24073	0.240294	0.32903	0.330281	0.39828	0.398734	0.00303237	-0.000545403	0.265425	0.267769	0.368843	0.367662	0.383979	0.384804	0.00565955	0.00493592	0.231297	0.233434	0.296006	0.294494	0.316524	0.318644	0.000610816	0.000340307	0.267692	0.266153	0.328081	0.327753	0.416397	0.416179	0.0014516	0.00171258	0.256573	0.255945	0.296606	0.295019	0.398975	0.401809	0.000796436
Ala 235 (M3)	-0.000369405	-0.000347019	0.000374585	-0.000241048	-0.000251551	0.000248749	0.000467779	0.000298983	-3.63479e-05	-0.000256453	0.00040418	0.000932396	-0.000137665	-0.00021127	0.000157926	-0.000149918	0.000488641	0.000390021	-3.264e-05	-0.000294532	-0.0011958	-0.000226914	0.000627197	0.000898376	-0.000453232	0.000172914	-0.000603491	4.44835e-05	-0.00168873	-0.000639758	-0.000654156	-0.000948452	-8.46511e-05	-6.07562e-05	-0.000575052	0.000592479	-0.000242554	0.000599533	-1.87959e-06	0.000553371	-0.000317134	-0.000254503	-0.000333033	-0.000685725	0.000417992	0.000654238	0.000832871	-0.000138516	-0.000301178
Ala 236 (M4)	2.96849e-05	-4.78237e-05	-8.64711e-05	2.53817e-05	2.64824e-05	-3.52321e-06	-9.73697e-05	0.000240784	8.97654e-05	9.85433e-05	-0.000289544	0.00109067	-0.000194566	9.08914e-05	-3.81663e-05	-0.000269193	0.000111982	6.01082e-05	0.000308156	2.13269e-05	-4.47571e-06	0.000431873	0.000207257	0.000223523	0.000216302	0.000149851	0.000382105	0.000333573	0.000348485	0.00015822	0.000411725	7.70721e-05	-8.95672e-05	-9.20485e-05	0.000659814	0.000296313	-8.02672e-05	-8.69798e-05	0.000121811	3.29751e-05	5.61366e-06	-3.08711e-05	-6.14402e-05	0.000325688	-0.000156943	-0.000193447	-0.000418574	-0.000359958	6.0347e-05
Ala 237 (M5)	7.72349e-05	8.17299e-05	-2.3552e-05	6.42104e-06	0.000144229	-3.01813e-05	3.03388e-05	-1.61912e-05	-9.23093e-05	4.97273e-05	0.000285516	-2.30047e-05	8.18846e-05	1.58171e-05	0.00016578	0.000104279	-0.000288014	-0.000227122	-6.54337e-05	0.000115439	0.000105325	8.07576e-05	0.000112095	-0.000310393	4.28924e-06	-2.89882e-05	-5.78489e-05	-0.000126857	0.000194784	0.000162317	-1.62909e-05	0.000448922	8.64956e-05	8.4027e-05	7.30231e-07	-1.13476e-05	-4.82486e-05	1.43289e-05	-5.57327e-05	-8.31611e-05	7.66303e-05	7.51902e-05	0.000128776	9.05016e-05	0.000124413	0.000259566	0.000577284	0.000354502	7.21294e-05
Atom Percent Enrichment	0.00287606	0.00336614	0.260582	0.260231	0.339894	0.340755	0.400867	0.400501	0.00235066	0.00285819	0.256836	0.255206	0.360084	0.362029	0.434558	0.434745	0.00366895	-0.000904818	0.282485	0.28534	0.396685	0.394848	0.417439	0.418131	0.00583582	0.00532303	0.250189	0.252253	0.329625	0.327461	0.355292	0.3549	0.00109933	0.00188125	0.289057	0.287752	0.358406	0.358166	0.454628	0.454537	0.00243975	0.00283811	0.273501	0.272533	0.32594	0.323829	0.431594	0.435577	0.00163306
Asp 302 (M0)	0	0	0.6617	0.6791	0.6072	0.619	0.6104	0.6088	0.6957	0.7168	0	0.5058	0.5331	0.5454	0.5075	0.4891	0.7097	0.7057	0.4416	0.4756	0.3965	0.4385	0	0	0.6663	0.6745	0	0	0	0	0	0.3657	0.6384	0.654	0	0	0	0	0	0	0.6854	0.6882	0.3697	0.4323	0	0	0.515	0.4911	0.7185
Asp 303 (M1)	0	0	0.207	0.1954	0.1992	0.2083	0.2226	0.2255	0.2162	0.1916	0	0.1887	0.2184	0.2151	0.196	0.1978	0.2054	0.2098	0.1651	0.1758	0.1765	0.1879	0	0	0.2155	0.2186	0	0	0	0	0	0.1716	0.22	0.2196	0	0	0	0	0	0	0.2225	0.2188	0.1718	0.1747	0	0	0.2169	0.2108	0.1905
Asp 304 (M2)	0	0	0.1313	0.1255	0.1427	0.1323	0.167	0.1657	0.0871	0.0707	0	0.2416	0.2337	0.1915	0.2329	0.2419	0.0807	0.0726	0.2926	0.2577	0.3185	0.2728	0	0	0.0891	0.0802	0	0	0	0	0	0.3386	0.1032	0.097	0	0	0	0	0	0	0.0745	0.072	0.3385	0.2868	0	0	0.2057	0.2251	0.0749
Asp 305 (M3)	0	0	0	0	0.0421	0.0307	0	0	0	0.0209	0	0.0402	0.0148	0.0397	0.0491	0.0489	0.0001	0.0073	0.0665	0.0575	0.0712	0.0616	0	0	0.0179	0.0179	0	0	0	0	0	0.0819	0.0242	0.0193	0	0	0	0	0	0	0.0118	0.0155	0.0772	0.0634	0	0	0.031	0.0463	0.0133
Asp 306 (M4)	0	0	0	0	0.0088	0.0097	0	0	0.001	0	0	0.0237	0	0.0043	0.0145	0.0164	0	0	0.0251	0.0203	0.0258	0.0276	0	0	0.0058	0.0034	0	0	0	0	0	0.0313	0.0075	0.0041	0	0	0	0	0	0	0.0019	0.0011	0.0322	0.0277	0	0	0.0226	0.0221	0.0025
Asp 307 (M5)	0	0	0	0	0	0	0	0	0	0	0	0	0	0.0039	0	0.0059	0.0041	0.0047	0.009	0.013	0.0115	0.0116	0	0	0.0054	0.0053	0	0	0	0	0	0.0108	0.0066	0.006	0	0	0	0	0	0	0.0039	0.0043	0.0107	0.015	0	0	0.0087	0.0046	0.0003
Corrected Data
Asp 302 (M0)	#VALUE!	#VALUE!	0.918138	0.942296	0.843131	0.85926	0.846931	0.844708	0.965292	0.995115	#VALUE!	0.701981	0.739917	0.756366	0.70467	0.677645	0.983319	0.977631	0.611326	0.657409	0.548384	0.606287	#VALUE!	#VALUE!	0.92297	0.93452	#VALUE!	#VALUE!	#VALUE!	#VALUE!	#VALUE!	0.506007	0.884108	0.905805	#VALUE!	#VALUE!	#VALUE!	#VALUE!	#VALUE!	#VALUE!	0.949907	0.953855	0.511389	0.597079	#VALUE!	#VALUE!	0.712458	0.680573	0.997119
Asp 303 (M1)	#VALUE!	#VALUE!	0.0441448	0.0219135	0.0532426	0.061441	0.0841581	0.0887183	0.0444407	0.00302689	#VALUE!	0.075583	0.106461	0.0973878	0.0850279	0.0939731	0.0245058	0.03198	0.0663031	0.0685507	0.0981411	0.0985248	#VALUE!	#VALUE!	0.0540523	0.0553426	#VALUE!	#VALUE!	#VALUE!	#VALUE!	#VALUE!	0.102616	0.0703025	0.0641145	#VALUE!	#VALUE!	#VALUE!	#VALUE!	#VALUE!	#VALUE!	0.0567574	0.0506744	0.101413	0.082624	#VALUE!	#VALUE!	0.110604	0.111091	0.000899148
Asp 304 (M2)	#VALUE!	#VALUE!	0.075048	0.0703213	0.0959161	0.0780593	0.120632	0.117947	0.0102281	-0.00460193	#VALUE!	0.238696	0.216444	0.159541	0.224393	0.236378	0.00456882	-0.00772902	0.318371	0.265386	0.351396	0.283528	#VALUE!	#VALUE!	0.0145832	0.00105965	#VALUE!	#VALUE!	#VALUE!	#VALUE!	#VALUE!	0.38193	0.0334898	0.0244744	#VALUE!	#VALUE!	#VALUE!	#VALUE!	#VALUE!	#VALUE!	-0.00853642	-0.0107919	0.381419	0.306964	#VALUE!	#VALUE!	0.179222	0.20909	0.00139901
Asp 305 (M3)	#VALUE!	#VALUE!	-0.0383937	-0.0354703	0.0141456	0.00188409	-0.0521629	-0.051924	-0.0235274	0.0120315	#VALUE!	-0.0228362	-0.0556386	-0.00746382	-0.00823123	-0.0119687	-0.0203632	-0.0082627	-0.00417842	-0.00466207	-0.00796194	-0.0055685	#VALUE!	#VALUE!	-0.000539427	0.0024163	#VALUE!	#VALUE!	#VALUE!	#VALUE!	#VALUE!	-0.00054361	0.00247596	-0.00173988	#VALUE!	#VALUE!	#VALUE!	#VALUE!	#VALUE!	#VALUE!	-0.00392823	0.0021699	-0.0067884	-0.00717554	#VALUE!	#VALUE!	-0.0246894	-0.0106062	0.000422324
Asp 306 (M4)	#VALUE!	#VALUE!	-0.00142438	-0.00138119	-0.00415587	0.00158775	-0.00296078	-0.00282586	0.00248399	-0.00546095	#VALUE!	0.0112142	-0.0114762	-0.011688	-0.00358263	-0.00137482	0.00118234	-0.000660934	0.00118591	-0.000264903	-0.000524995	0.00773596	#VALUE!	#VALUE!	0.00296115	0.000251445	#VALUE!	#VALUE!	#VALUE!	#VALUE!	#VALUE!	0.00222418	0.00254403	-0.000127878	#VALUE!	#VALUE!	#VALUE!	#VALUE!	#VALUE!	#VALUE!	0.000620011	-0.00163563	0.00499656	0.00623133	#VALUE!	#VALUE!	0.0152455	0.00839175	0.000193253
Asp 307 (M5)	#VALUE!	#VALUE!	0.00248717	0.00232038	-0.00227964	-0.00223212	0.00340242	0.00337601	0.00108296	-0.000110239	#VALUE!	-0.00463888	0.0042927	0.00585681	-0.00227774	0.00534703	0.00678722	0.00704205	0.00699188	0.0135814	0.0105659	0.00949266	#VALUE!	#VALUE!	0.0059725	0.00640996	#VALUE!	#VALUE!	#VALUE!	#VALUE!	#VALUE!	0.0077665	0.00707928	0.00747409	#VALUE!	#VALUE!	#VALUE!	#VALUE!	#VALUE!	#VALUE!	0.00518025	0.005728	0.00757116	0.0142765	#VALUE!	#VALUE!	0.00716006	0.00146021	-3.2841e-05
Atom Percent Enrichment	#VALUE!	#VALUE!	0.0971204	0.081278	0.122537	0.10878	0.162712	0.162307	0.0324485	-0.00308848	#VALUE!	0.276488	0.269674	0.208235	0.266907	0.283365	0.0168217	0.00826095	0.351523	0.299661	0.400466	0.332791	#VALUE!	#VALUE!	0.0416093	0.0287309	#VALUE!	#VALUE!	#VALUE!	#VALUE!	#VALUE!	0.433238	0.0686411	0.0565316	#VALUE!	#VALUE!	#VALUE!	#VALUE!	#VALUE!	#VALUE!	0.0198423	0.0145453	0.432125	0.348276	#VALUE!	#VALUE!	0.234524	0.264636	0.00184859
Asp 390 (M0)	0	0	0.5058	0.5219	0.498	0.4747	0.4593	0.4364	0.6567	0.6434	0	0.4731	0.4623	0.4499	0.4247	0.4367	0.6275	0.6615	0.4754	0.5065	0.444	0.4668	0	0	0.6071	0.6177	0	0	0	0	0	0.4119	0.5982	0.6334	0	0	0	0	0	0	0.6181	0.6248	0.4643	0.4924	0	0	0.5592	0.5068	0.6446
Asp 391 (M1)	0	0	0.2277	0.2368	0.2482	0.2334	0.2401	0.2495	0.262	0.2483	0	0.1935	0.2268	0.2259	0.2427	0.2339	0.258	0.2439	0.2152	0.2268	0.2212	0.2104	0	0	0.2527	0.2499	0	0	0	0	0	0.2099	0.2499	0.2314	0	0	0	0	0	0	0.243	0.2382	0.2021	0.2148	0	0	0.2481	0.2469	0.2219
Asp 392 (M2)	0	0	0.1374	0.1323	0.1494	0.1663	0.1522	0.1574	0.0813	0.0876	0	0.0842	0.1351	0.1491	0.1552	0.1422	0.1027	0.0917	0.1213	0.1229	0.1303	0.1474	0	0	0.1044	0.1131	0	0	0	0	0	0.135	0.1128	0.0981	0	0	0	0	0	0	0.1044	0.1086	0.1077	0.1127	0	0	0.1332	0.1453	0.104
Asp 393 (M3)	0	0	0.1141	0.109	0.1044	0.1003	0.1283	0.1296	0	0.0207	0	0.2355	0.1217	0.1398	0.1391	0.1495	0.0118	0.0029	0.1427	0.1137	0.1469	0.1433	0	0	0.0358	0.0157	0	0	0	0	0	0.1702	0.0336	0.0371	0	0	0	0	0	0	0.0303	0.0248	0.1585	0.1263	0	0	0.0595	0.0892	0.0236
Asp 394 (M4)	0	0	0.015	0	0	0.0223	0.0201	0.0271	0	0	0	0.0136	0.0405	0.0293	0.0334	0.0276	0	0	0.0326	0.0267	0.0478	0.0321	0	0	0	0.0036	0	0	0	0	0	0.0532	0.0054	0	0	0	0	0	0	0	0.0042	0.0037	0.0499	0.0418	0	0	0	0.0118	0.005
Asp 395 (M5)	0	0	0	0	0	0.0031	0	0	0	0	0	0	0.0137	0.006	0.0048	0.0101	0	0	0.0128	0	0.0098	0	0	0	0	0	0	0	0	0	0	0.0198	0	0	0	0	0	0	0	0	0	0	0.0175	0.0102	0	0	0	0	0.0008
Asp 396 (M6)	0	0	0	0	0	0	0	0	0	0	0	0	0	0	0	0	0	0	0	0.0035	0	0	0	0	0	0	0	0	0	0	0	0	0	0	0	0	0	0	0	0	0	0	0	0.0017	0	0	0	0	0
Corrected Data
Asp 390 (M0)	#VALUE!	#VALUE!	0.78949	0.814081	0.776773	0.741011	0.717026	0.681486	1.02475	1.00393	#VALUE!	0.738377	0.722041	0.702499	0.66336	0.681744	0.979101	1.0322	0.742318	0.78955	0.693818	0.729118	#VALUE!	#VALUE!	0.947214	0.963931	#VALUE!	#VALUE!	#VALUE!	#VALUE!	#VALUE!	0.643565	0.933635	0.988258	#VALUE!	#VALUE!	#VALUE!	#VALUE!	#VALUE!	#VALUE!	0.964573	0.974908	0.725454	0.768709	#VALUE!	#VALUE!	0.87236	0.790965	1.00605
Asp 391 (M1)	#VALUE!	#VALUE!	0.0786146	0.0839211	0.114396	0.104207	0.122874	0.149795	0.0501278	0.0361537	#VALUE!	0.0434523	0.100762	0.106041	0.14564	0.125497	0.0597017	0.0195986	0.0757484	0.0767469	0.102045	0.073	#VALUE!	#VALUE!	0.0625225	0.052493	#VALUE!	#VALUE!	#VALUE!	#VALUE!	#VALUE!	0.101906	0.0630227	0.0154625	#VALUE!	#VALUE!	#VALUE!	#VALUE!	#VALUE!	#VALUE!	0.0416268	0.0305986	0.0615465	0.06594	#VALUE!	#VALUE!	0.0812503	0.107708	-0.00524271
Asp 392 (M2)	#VALUE!	#VALUE!	0.0577325	0.0441143	0.0659433	0.101046	0.0770968	0.0817599	-0.055925	-0.0383169	#VALUE!	-0.00361185	0.057677	0.0803613	0.0827298	0.0665639	-0.0191963	-0.0310131	0.0416884	0.0359576	0.0545116	0.0846599	#VALUE!	#VALUE!	-0.0124746	0.00153492	#VALUE!	#VALUE!	#VALUE!	#VALUE!	#VALUE!	0.069722	0.00240201	-0.0128693	#VALUE!	#VALUE!	#VALUE!	#VALUE!	#VALUE!	#VALUE!	-0.00820957	0.000230058	0.0284591	0.0275945	#VALUE!	#VALUE!	0.0371196	0.0597951	0.000287907
Asp 393 (M3)	#VALUE!	#VALUE!	0.112616	0.107492	0.0900828	0.0755266	0.123577	0.121196	-0.0270771	0.00141439	#VALUE!	0.323211	0.123243	0.143092	0.136595	0.159904	-0.0209848	-0.0262894	0.163272	0.119133	0.163309	0.15123	#VALUE!	#VALUE!	0.0138036	-0.0201348	#VALUE!	#VALUE!	#VALUE!	#VALUE!	#VALUE!	0.195439	0.00609414	0.021725	#VALUE!	#VALUE!	#VALUE!	#VALUE!	#VALUE!	#VALUE!	0.00674492	-0.0029625	0.194421	0.14358	#VALUE!	#VALUE!	0.0333241	0.0697305	-0.000340611
Asp 394 (M4)	#VALUE!	#VALUE!	-0.0314087	-0.0507493	-0.0493476	-0.0157809	-0.0310875	-0.0211043	0.00664933	-0.00441357	#VALUE!	-0.08911	0.00359449	-0.0231429	-0.016296	-0.0294296	-0.000877753	0.00357741	-0.0178711	-0.0124339	0.00266138	-0.0211996	#VALUE!	#VALUE!	-0.0127563	0.00148426	#VALUE!	#VALUE!	#VALUE!	#VALUE!	#VALUE!	-0.00126412	-0.00434755	-0.0138994	#VALUE!	#VALUE!	#VALUE!	#VALUE!	#VALUE!	#VALUE!	-0.00424623	-0.0029266	0.00113842	0.00454526	#VALUE!	#VALUE!	-0.026588	-0.0240168	-0.000805842
Asp 395 (M5)	#VALUE!	#VALUE!	-0.0108736	-0.00358513	-0.00232172	-0.00711132	-0.0135646	-0.0166958	0.00208158	0.000799595	#VALUE!	-0.022187	-0.00295344	-0.0099321	-0.0132775	-0.00396916	0.00227787	0.0023324	-0.00288756	-0.0171209	-0.0145038	-0.0207625	#VALUE!	#VALUE!	0.00054196	0.000778371	#VALUE!	#VALUE!	#VALUE!	#VALUE!	#VALUE!	-0.00347152	-0.00143832	4.50327e-05	#VALUE!	#VALUE!	#VALUE!	#VALUE!	#VALUE!	#VALUE!	-0.00107552	-0.000226261	-0.00593584	-0.0104024	#VALUE!	#VALUE!	0.000221328	-0.0070049	0.00016317
Asp 396 (M6)	#VALUE!	#VALUE!	0.0038297	0.00472676	0.00447441	0.001101	0.00407788	0.00356364	-0.000609318	0.000432092	#VALUE!	0.00986839	-0.00436362	0.00108172	0.00124899	-0.000309837	-2.20217e-05	-0.000407852	-0.00226868	0.00816712	-0.00184059	0.00395443	#VALUE!	#VALUE!	0.00114914	-8.71731e-05	#VALUE!	#VALUE!	#VALUE!	#VALUE!	#VALUE!	-0.00589639	0.000632079	0.00127845	#VALUE!	#VALUE!	#VALUE!	#VALUE!	#VALUE!	#VALUE!	0.000587019	0.000378758	-0.00508229	3.29766e-05	#VALUE!	#VALUE!	0.00231237	0.00282368	-0.000112535
Atom Percent Enrichment	#VALUE!	#VALUE!	0.177309	0.164875	0.172177	0.177626	0.215933	0.225634	-0.0476511	-0.012079	#VALUE!	0.335287	0.195282	0.232013	0.240295	0.246112	-0.0138818	-0.040432	0.216314	0.168687	0.233665	0.232003	#VALUE!	#VALUE!	0.0263281	-0.00161389	#VALUE!	#VALUE!	#VALUE!	#VALUE!	#VALUE!	0.275889	0.0287031	0.0182996	#VALUE!	#VALUE!	#VALUE!	#VALUE!	#VALUE!	#VALUE!	0.0151475	0.00739041	0.233909	0.183957	#VALUE!	#VALUE!	0.0851539	0.145496	-0.00189624
Asp 418 (M0)	0	0	0.4408	0.427	0.4021	0.4088	0.3497	0.3457	0.6326	0.6235	0	0.245	0.257	0.3238	0.2378	0.2334	0.6253	0.6361	0.2289	0.2542	0.2014	0.2304	0	0	0.5827	0.5943	0	0	0	0	0	0.1882	0.5656	0.5687	0	0	0	0	0	0	0.6092	0.6122	0.2051	0.2371	0	0	0.3019	0.2785	0.6342
Asp 419 (M1)	0	0	0.1945	0.1813	0.2043	0.2036	0.2017	0.2011	0.2392	0.2358	0	0.1375	0.1558	0.1727	0.1368	0.1306	0.2487	0.2502	0.1225	0.13	0.1356	0.1434	0	0	0.2521	0.2489	0	0	0	0	0	0.1287	0.2515	0.253	0	0	0	0	0	0	0.265	0.265	0.1271	0.1354	0	0	0.1773	0.1722	0.2269
Asp 420 (M2)	0	0	0.1226	0.1106	0.1468	0.1344	0.1364	0.1398	0.1221	0.113	0	0.083	0.1168	0.1357	0.1074	0.1071	0.1008	0.0936	0.0715	0.0793	0.0918	0.0964	0	0	0.0872	0.0906	0	0	0	0	0	0.0856	0.0774	0.0772	0	0	0	0	0	0	0.0848	0.0844	0.0765	0.0788	0	0	0.1194	0.1221	0.1067
Asp 421 (M3)	0	0	0.0641	0.0589	0.0777	0.0728	0.0812	0.0811	0	0.0233	0	0.0488	0.0649	0.0661	0.0674	0.0659	0.0226	0.0201	0.0466	0.0508	0.062	0.0653	0	0	0.0213	0.0172	0	0	0	0	0	0.0594	0.0198	0.0187	0	0	0	0	0	0	0.0191	0.0208	0.0507	0.05	0	0	0.0664	0.0736	0.0251
Asp 422 (M4)	0	0	0.1188	0.1456	0.1264	0.1193	0.1519	0.1606	0.0061	0.0044	0	0.333	0.2762	0.2174	0.3078	0.3168	0.0026	0	0.3596	0.3289	0.3467	0.3193	0	0	0.0395	0.0351	0	0	0	0	0	0.3693	0.0598	0.0549	0	0	0	0	0	0	0.0168	0.0136	0.3683	0.3373	0	0	0.2328	0.2408	0.006
Asp 423 (M5)	0	0	0.043	0.0531	0.0299	0.0464	0.0558	0.0493	0	0	0	0.0992	0.0884	0.0604	0.0974	0.0976	0	0	0.1126	0.1057	0.1098	0.0949	0	0	0.0121	0.0098	0	0	0	0	0	0.113	0.018	0.0183	0	0	0	0	0	0	0.0047	0.004	0.1168	0.1082	0	0	0.069	0.0779	0.001
Asp 424 (M6)	0	0	0.0164	0.0236	0.0126	0.0148	0.0232	0.0224	0	0	0	0.0536	0.0409	0.0239	0.0454	0.0486	0	0	0.0583	0.0511	0.0527	0.0503	0	0	0.0052	0.004	0	0	0	0	0	0.0557	0.0079	0.0092	0	0	0	0	0	0	0.0006	0.0001	0.0556	0.0533	0	0	0.0333	0.0349	0.0001
Corrected Data
Asp 418 (M0)	#VALUE!	#VALUE!	0.693745	0.670265	0.634771	0.643881	0.549194	0.543416	1.00052	0.986024	#VALUE!	0.381525	0.401869	0.509786	0.371438	0.364124	0.988826	1.00581	0.355933	0.396232	0.313874	0.359221	#VALUE!	#VALUE!	0.920169	0.939131	#VALUE!	#VALUE!	#VALUE!	#VALUE!	#VALUE!	0.293168	0.89272	0.896802	#VALUE!	#VALUE!	#VALUE!	#VALUE!	#VALUE!	#VALUE!	0.963423	0.968388	0.319406	0.369244	#VALUE!	#VALUE!	0.473209	0.43624	1.00295
Asp 419 (M1)	#VALUE!	#VALUE!	0.0551843	0.0422754	0.092462	0.0873946	0.117317	0.118737	0.0171161	0.016932	#VALUE!	0.0756293	0.0975511	0.0870001	0.0787916	0.0715785	0.0360943	0.0323417	0.0613823	0.0590194	0.0970119	0.0929445	#VALUE!	#VALUE!	0.0653657	0.0538658	#VALUE!	#VALUE!	#VALUE!	#VALUE!	#VALUE!	0.0936746	0.0740297	0.0745577	#VALUE!	#VALUE!	#VALUE!	#VALUE!	#VALUE!	#VALUE!	0.0706831	0.0690054	0.0817903	0.0767899	#VALUE!	#VALUE!	0.106001	0.11111	-0.00303014
Asp 420 (M2)	#VALUE!	#VALUE!	0.0550918	0.0445127	0.0898903	0.0705133	0.0782706	0.0841578	0.0177456	0.00610279	#VALUE!	0.0372653	0.0785565	0.0947179	0.0755137	0.0785621	-0.0198777	-0.0325392	0.0287422	0.0350628	0.0545589	0.0555521	#VALUE!	#VALUE!	-0.0398994	-0.0337021	#VALUE!	#VALUE!	#VALUE!	#VALUE!	#VALUE!	0.0496204	-0.0535657	-0.0548394	#VALUE!	#VALUE!	#VALUE!	#VALUE!	#VALUE!	#VALUE!	-0.0524023	-0.0532311	0.0354965	0.0324998	#VALUE!	#VALUE!	0.0682621	0.0766171	0.000467747
Asp 421 (M3)	#VALUE!	#VALUE!	0.0432119	0.0416025	0.0489036	0.0481236	0.0568293	0.0548138	-0.0477259	-0.00756251	#VALUE!	0.0339719	0.0404665	0.0350437	0.0493739	0.0474134	-0.00312762	-0.00276807	0.0367094	0.0399068	0.0473277	0.0509028	#VALUE!	#VALUE!	-0.000499042	-0.00770819	#VALUE!	#VALUE!	#VALUE!	#VALUE!	#VALUE!	0.0463669	0.00144682	-7.6812e-05	#VALUE!	#VALUE!	#VALUE!	#VALUE!	#VALUE!	#VALUE!	-0.00217194	0.000792665	0.0388598	0.0376743	#VALUE!	#VALUE!	0.0422831	0.050947	-0.000354627
Asp 422 (M4)	#VALUE!	#VALUE!	0.147859	0.190556	0.151708	0.143983	0.188185	0.201216	0.0120817	-0.00154755	#VALUE!	0.473257	0.380648	0.293452	0.42602	0.439398	-0.00235106	-0.0044223	0.513357	0.466521	0.486849	0.444585	#VALUE!	#VALUE!	0.055282	0.0502809	#VALUE!	#VALUE!	#VALUE!	#VALUE!	#VALUE!	0.521726	0.0873844	0.0805429	#VALUE!	#VALUE!	#VALUE!	#VALUE!	#VALUE!	#VALUE!	0.0229187	0.0172638	0.52495	0.479318	#VALUE!	#VALUE!	0.316572	0.324356	1.3493e-05
Asp 423 (M5)	#VALUE!	#VALUE!	0.00763222	0.00988479	-0.0155691	0.0125086	0.0106655	-0.00307193	0.00128831	-0.000213703	#VALUE!	-0.01006	0.00102612	-0.0124325	-0.00111365	-0.0049612	0.000107914	0.00117076	-0.00299639	0.00119706	-0.00122922	-0.010627	#VALUE!	#VALUE!	0.000281743	-0.00062454	#VALUE!	#VALUE!	#VALUE!	#VALUE!	#VALUE!	-0.00720157	-0.000838302	0.00203194	#VALUE!	#VALUE!	#VALUE!	#VALUE!	#VALUE!	#VALUE!	-3.75442e-05	0.000271603	-0.000860293	0.0010483	#VALUE!	#VALUE!	-0.00755107	0.00161845	3.48682e-05
Asp 424 (M6)	#VALUE!	#VALUE!	-0.00272386	0.000902735	-0.00216544	-0.00640391	-0.000462019	0.00073081	-0.00102697	0.000265067	#VALUE!	0.00841165	-0.000117667	-0.00756718	-2.32008e-05	0.00388486	0.00032831	0.000408737	0.0068722	0.00206137	0.0016078	0.00742101	#VALUE!	#VALUE!	-0.000700403	-0.00124312	#VALUE!	#VALUE!	#VALUE!	#VALUE!	#VALUE!	0.00264566	-0.00117698	0.000982137	#VALUE!	#VALUE!	#VALUE!	#VALUE!	#VALUE!	#VALUE!	-0.00241295	-0.00248994	0.000358206	0.0034257	#VALUE!	#VALUE!	0.00122398	-0.000888802	-7.90134e-05
Atom Percent Enrichment	#VALUE!	#VALUE!	0.22161	0.254583	0.256446	0.237181	0.299272	0.31409	-0.0105609	6.49671e-05	#VALUE!	0.536276	0.474664	0.388844	0.520505	0.532134	-0.00561209	-0.0146825	0.570606	0.528737	0.573878	0.533775	#VALUE!	#VALUE!	0.0512995	0.0411152	#VALUE!	#VALUE!	#VALUE!	#VALUE!	#VALUE!	0.60473	0.0801941	0.071705	#VALUE!	#VALUE!	#VALUE!	#VALUE!	#VALUE!	#VALUE!	0.0127593	0.0084941	0.59229	0.543021	#VALUE!	#VALUE!	0.408916	0.428653	-0.000776138
Cit 459 (M0)	0.6153	0.6156	0.5242	0.5251	0.4558	0.4551	0.3963	0.3976	0.6137	0.6141	0.5046	0.5096	0.4076	0.4053	0.3781	0.3766	0.6095	0.6161	0.5208	0.5195	0.4504	0.4484	0.4151	0.4149	0.6114	0.6111	0.5462	0.546	0.4687	0.4669	0.419	0.4194	0.6146	0.6154	0.4796	0.4793	0.4272	0.4263	0.3598	0.3592	0.6135	0.6152	0.5262	0.5224	0.4737	0.4753	0.4108	0.4125	0.6145
Cit 460 (M1)	0.2321	0.2321	0.2361	0.2355	0.239	0.2394	0.2411	0.2409	0.2323	0.2333	0.2339	0.2357	0.2401	0.2402	0.2437	0.2434	0.233	0.2316	0.2422	0.2433	0.249	0.2499	0.2603	0.2599	0.2344	0.2346	0.2373	0.2371	0.2451	0.2469	0.2498	0.2503	0.232	0.2329	0.2448	0.244	0.2523	0.2525	0.2506	0.2513	0.2337	0.2327	0.2419	0.2432	0.2534	0.2523	0.2462	0.2463	0.2331
Cit 461 (M2)	0.1138	0.1134	0.1441	0.1446	0.1658	0.1659	0.1821	0.1822	0.1141	0.1143	0.1518	0.1492	0.1809	0.1811	0.1862	0.1859	0.116	0.1134	0.1433	0.1431	0.1635	0.1645	0.1718	0.1726	0.1149	0.1153	0.1354	0.1355	0.1606	0.1603	0.1758	0.1756	0.1147	0.1136	0.1587	0.1596	0.1728	0.173	0.1924	0.1932	0.1137	0.1135	0.14	0.1413	0.1561	0.1556	0.1814	0.1802	0.1146
Cit 462 (M3)	0.029	0.0291	0.0617	0.0611	0.0833	0.0843	0.104	0.1033	0.03	0.029	0.0659	0.0653	0.0966	0.0973	0.1059	0.1074	0.0308	0.0295	0.06	0.0608	0.0828	0.0828	0.0897	0.0892	0.0297	0.0296	0.0537	0.0539	0.0771	0.0784	0.0917	0.092	0.0289	0.0288	0.0727	0.0729	0.0894	0.0893	0.1107	0.1103	0.0291	0.029	0.0593	0.0605	0.0733	0.0735	0.0952	0.0935	0.0286
Cit 463 (M4)	0.0077	0.0078	0.0233	0.0232	0.0364	0.0362	0.0489	0.0492	0.0081	0.0076	0.0268	0.0266	0.0469	0.048	0.0534	0.0538	0.0088	0.0077	0.0229	0.0231	0.036	0.0362	0.0403	0.0409	0.0078	0.0077	0.019	0.0188	0.0322	0.032	0.0416	0.0416	0.0078	0.0075	0.0298	0.03	0.0391	0.0393	0.0551	0.0546	0.008	0.0077	0.0223	0.0226	0.0289	0.0294	0.043	0.0438	0.0075
Cit 464 (M5)	0.0019	0.0017	0.0083	0.0081	0.0148	0.0144	0.0205	0.0198	0.0016	0.0014	0.0128	0.0102	0.0205	0.0205	0.0235	0.0236	0.0017	0.0017	0.0082	0.0081	0.0137	0.0135	0.0166	0.0165	0.0016	0.0015	0.0065	0.0068	0.0122	0.0118	0.0166	0.016	0.0017	0.0016	0.011	0.0109	0.0144	0.0147	0.0227	0.0227	0.0017	0.0016	0.0078	0.0078	0.011	0.0105	0.0185	0.0188	0.0014
Cit 465 (M6)	0.0003	0.0003	0.0024	0.0024	0.0048	0.0046	0.0071	0.007	0.0001	0.0003	0.0042	0.0033	0.0074	0.0076	0.0091	0.0092	0.0002	0	0.0025	0.0021	0.0045	0.0046	0.0062	0.0059	0.0003	0.0002	0.0018	0.0019	0.0041	0.0037	0.0055	0.0051	0.0003	0.0002	0.0034	0.0033	0.0048	0.0049	0.0087	0.0088	0.0004	0.0002	0.0024	0.0022	0.0035	0.0034	0.0048	0.0049	0.0002
Corrected Data
Cit 459 (M0)	0.995286	0.995885	0.847309	0.848851	0.736188	0.735136	0.639455	0.641613	0.993027	0.993458	0.814921	0.823545	0.657534	0.65379	0.609574	0.607132	0.986105	0.996842	0.841931	0.839929	0.727603	0.724346	0.669964	0.669832	0.98899	0.988652	0.883234	0.882756	0.757165	0.754416	0.676532	0.677334	0.994263	0.995602	0.77501	0.774573	0.690007	0.688516	0.580183	0.579113	0.992346	0.995387	0.850703	0.844569	0.765486	0.768069	0.663577	0.666245	0.99425
Cit 460 (M1)	-0.00237403	-0.00255655	0.0593196	0.0578199	0.105394	0.106469	0.144694	0.143601	-0.00108249	0.000274993	0.0676402	0.0675285	0.136219	0.137765	0.159737	0.160161	0.00258963	-0.00366097	0.0711466	0.0737036	0.12467	0.127316	0.163991	0.16352	0.00367513	0.004178	0.0479044	0.0476976	0.107336	0.111328	0.144922	0.145512	-0.00210907	-0.0011549	0.100275	0.099184	0.143992	0.14485	0.181855	0.183303	0.00127941	-0.0013536	0.067392	0.0717788	0.117603	0.114874	0.144206	0.143318	-0.000288097
Cit 461 (M2)	0.005909	0.0052576	0.0572305	0.0583205	0.0940952	0.0940742	0.122255	0.122459	0.00637004	0.00607642	0.0718635	0.0664359	0.120204	0.1206	0.12825	0.128041	0.00923319	0.00551872	0.0526296	0.0517597	0.0849892	0.0861681	0.0936588	0.0951949	0.00655368	0.00709004	0.0414028	0.041683	0.0815264	0.0801333	0.105887	0.105279	0.00743677	0.0051201	0.0780358	0.0799491	0.0992094	0.0994602	0.135193	0.136062	0.00493032	0.00509169	0.0472468	0.048785	0.0692835	0.0690332	0.117398	0.115322	0.00664379
Cit 462 (M3)	0.000338834	0.000736403	0.0291441	0.0280201	0.0467128	0.0481586	0.0664059	0.0653497	0.00163326	-9.1092e-05	0.0304281	0.0311224	0.0562086	0.0570511	0.0658278	0.0682698	0.00153705	0.00142539	0.0263264	0.0275449	0.0462376	0.0455025	0.0495807	0.0483825	0.000441442	3.02295e-05	0.0226611	0.0229166	0.0402425	0.0422274	0.0514283	0.0520091	-0.000354384	8.84591e-05	0.035069	0.0349184	0.0498172	0.0494821	0.0683721	0.0672077	0.000340344	0.000460185	0.0274039	0.0282514	0.0365416	0.0372994	0.0535764	0.0516723	-0.00084937
Cit 463 (M4)	0.000339575	0.000470204	0.00496003	0.00505748	0.0122231	0.0113936	0.0193758	0.0201972	0.000411729	0.000214276	0.00743675	0.00774234	0.0202738	0.0215887	0.0251383	0.0249582	0.000966379	7.273e-05	0.0056498	0.00560642	0.012596	0.0128814	0.0155568	0.0166758	0.000165484	4.58924e-05	0.00329748	0.00286169	0.00976662	0.00888361	0.0156277	0.0155124	0.000476545	0.00019594	0.00853541	0.00862786	0.0133546	0.0137135	0.025128	0.0245455	0.000846652	0.000394855	0.00532167	0.00511918	0.007488	0.00813	0.0153158	0.017556	0.000240914
Cit 464 (M5)	0.000676883	0.000288756	0.00180055	0.00161696	0.0046989	0.00411912	0.00642917	0.00526203	-4.6028e-05	-6.75782e-06	0.00703001	0.00304968	0.0079345	0.00733295	0.00882717	0.00864539	-0.000200313	0.000306955	0.00195664	0.00163151	0.00315775	0.00280912	0.0053993	0.00502257	0.000182755	0.000111355	0.00134837	0.00190059	0.00304806	0.00242701	0.00477596	0.00382368	0.000377487	0.000325059	0.00265485	0.00243244	0.00269026	0.00306787	0.0067501	0.00708154	0.000209055	0.000201672	0.00151335	0.00134682	0.00295169	0.00188145	0.00701603	0.00712726	9.0992e-05
Cit 465 (M6)	-0.000176054	-8.0921e-05	0.000236323	0.000314449	0.000688169	0.000649554	0.00138555	0.00151801	-0.000313762	7.45554e-05	0.000680652	0.000576665	0.00162646	0.00187244	0.0026457	0.00279249	-0.000230448	-0.000504675	0.000360288	-0.000175525	0.000746506	0.000976613	0.00185011	0.00137175	-8.16225e-06	-0.000107801	0.00015246	0.000184061	0.000915457	0.000584611	0.000825918	0.000529794	-9.04093e-05	-0.000176352	0.000420448	0.000315136	0.000929697	0.00091079	0.00251862	0.00268818	4.82314e-05	-0.000182134	0.000419639	0.00014967	0.000646484	0.000713411	-0.00108869	-0.00124067	-8.85204e-05
Atom Percent Enrichment	0.00235781	0.00216782	0.0485789	0.0481204	0.0850398	0.0848601	0.117731	0.116796	0.00268193	0.00223753	0.0619387	0.0572408	0.11263	0.114062	0.129047	0.130144	0.00452474	0.00174172	0.0483215	0.0482313	0.0840021	0.0845985	0.100062	0.0998507	0.00327226	0.00309039	0.0365899	0.0369779	0.0751526	0.0749089	0.100388	0.0994074	0.00249208	0.00178361	0.068582	0.0687336	0.0940518	0.0946457	0.134455	0.134461	0.00281372	0.00195089	0.0459114	0.0470353	0.069064	0.0685077	0.104924	0.104566	0.00188981
aKG 346 (M0)	0.7056	0.6932	0.5873	0.5908	0.5324	0.5327	0.4743	0.4747	0.7111	0.7126	0.5593	0.602	0.4695	0.484	0.4393	0.4395	0.7171	0.7231	0.5842	0.5883	0.5289	0.5314	0.494	0.5041	0.7154	0.7147	0.5994	0.5955	0.5227	0.522	0.4903	0.4883	0.7024	0.7127	0.5492	0.5633	0.5174	0.4994	0.5397	0.6031	0.7161	0.7133	0.5925	0.5941	0.5584	0.5545	0.6041	0.561	0.7165
aKG 347 (M1)	0.1965	0.2042	0.2043	0.2019	0.2123	0.2129	0.2225	0.2245	0.1998	0.192	0.2144	0.1898	0.2122	0.2152	0.2172	0.2157	0.1928	0.1867	0.2077	0.2049	0.2155	0.2156	0.2304	0.2233	0.1883	0.1892	0.2048	0.2062	0.2225	0.2222	0.228	0.2301	0.1968	0.198	0.2091	0.2127	0.2201	0.2363	0.2276	0.2084	0.189	0.1905	0.2049	0.2054	0.2153	0.221	0.2224	0.2158	0.1888
aKG 348 (M2)	0.0785	0.0851	0.1359	0.1378	0.1585	0.1571	0.1761	0.1719	0.0892	0.0778	0.137	0.1403	0.1738	0.1645	0.1937	0.1913	0.0787	0.0768	0.1357	0.135	0.1584	0.1567	0.1572	0.1621	0.0788	0.0785	0.1315	0.1344	0.1613	0.1625	0.1696	0.1723	0.0894	0.0745	0.1584	0.1399	0.1524	0.1569	0.1216	0.1028	0.0777	0.0783	0.133	0.1329	0.1439	0.1436	0.1434	0.1515	0.0781
aKG 349 (M3)	0.0185	0.0175	0.0484	0.0481	0.0681	0.0695	0.0808	0.0864	0	0.0175	0.0583	0.0582	0.0869	0.0804	0.0941	0.1002	0.0115	0.0126	0.0514	0.0499	0.0672	0.0665	0.0764	0.0728	0.0144	0.0147	0.0462	0.0467	0.0656	0.0655	0.0776	0.0768	0.0115	0.0135	0.0594	0.0581	0.0778	0.0774	0.0632	0.0577	0.014	0.015	0.0479	0.047	0.0565	0.0558	0.0301	0.062	0.0136
aKG 350 (M4)	0.0009	0	0.0194	0.0181	0.0273	0.0227	0.0383	0.0331	0	0	0.031	0.0097	0.0436	0.038	0.0413	0.0443	0	0.0007	0.0161	0.0175	0.0232	0.0236	0.0309	0.0291	0.003	0.0029	0.015	0.014	0.0218	0.0219	0.0265	0.0253	0	0.0013	0.024	0.0259	0.0301	0.03	0.0407	0.0281	0.0032	0.0029	0.0183	0.0171	0.021	0.0194	0	0.0096	0.0026
aKG 351 (M5)	0	0	0.0046	0.0033	0.0014	0.0051	0.008	0.0094	0	0	0	0	0.014	0.0179	0.0144	0.0089	0	0	0.0049	0.0043	0.0069	0.0062	0.0111	0.0085	0	0	0.0031	0.0032	0.006	0.0059	0.0081	0.0072	0	0	0	0	0.0022	0	0.0072	0	0	0	0.0035	0.0035	0.0049	0.0057	0	0	0.0003
Corrected Data
aKG 346 (M0)	0.986026	0.96871	0.81949	0.824684	0.743664	0.743372	0.660968	0.661466	0.993222	0.99593	0.781266	0.841749	0.652961	0.672343	0.611053	0.612481	1.00188	1.01046	0.81518	0.821064	0.737508	0.741209	0.687877	0.702605	0.99964	0.998572	0.836816	0.831392	0.729234	0.728204	0.68348	0.680981	0.981341	0.995808	0.76736	0.787114	0.722589	0.697931	0.751875	0.84245	1.0005	0.996621	0.826904	0.829246	0.779098	0.773494	0.844463	0.784554	1.00108
aKG 347 (M1)	0.013405	0.028587	0.0673796	0.0628116	0.098586	0.0992104	0.133621	0.136219	0.015946	0.00462345	0.091651	0.0420816	0.12093	0.119637	0.138829	0.136949	0.00408103	-0.00654581	0.0732066	0.067857	0.104109	0.103364	0.137213	0.123867	-0.00151624	-1.6104e-05	0.0636818	0.0670427	0.116087	0.115921	0.135406	0.139091	0.0149875	0.0128784	0.0880456	0.0878678	0.114831	0.143893	0.116748	0.0673381	-0.000804748	0.00229286	0.0663202	0.0664345	0.0931149	0.102385	0.0863799	0.0930719	-0.00122754
aKG 348 (M2)	-0.00104916	0.00600957	0.081348	0.0846065	0.112673	0.110428	0.13618	0.129726	0.0121171	-0.000843428	0.0810302	0.0917345	0.136605	0.121949	0.163696	0.161239	-0.000146631	-0.00096941	0.0800746	0.0798717	0.111434	0.108969	0.106471	0.115138	0.00164849	0.000965781	0.0745184	0.0782184	0.113377	0.11515	0.124543	0.127667	0.0139302	-0.00744256	0.112723	0.0853841	0.102466	0.104093	0.0563672	0.0338728	-0.000138253	0.000321004	0.0768995	0.0765088	0.0900948	0.0879135	0.0845134	0.100383	0.000455207
aKG 349 (M3)	0.00545007	0.00114985	0.0235101	0.0227235	0.0408653	0.0431482	0.0500434	0.0588578	-0.023134	0.00477729	0.0352377	0.0366234	0.0593999	0.0538171	0.0615284	0.0707534	-0.00356673	-0.000935632	0.0273448	0.0258262	0.0393322	0.0390138	0.0502887	0.0445572	0.000549072	0.000981302	0.0222725	0.0218133	0.0356625	0.0351315	0.0479495	0.0458279	-0.00769676	9.24256e-05	0.0297661	0.0342306	0.0551216	0.0517066	0.0455043	0.0471357	0.000345186	0.00133883	0.0238872	0.0227181	0.0304256	0.0291311	-0.00433089	0.0354794	-0.000304884
aKG 350 (M4)	-0.00364345	-0.00478119	0.00822541	0.00641048	0.0113842	0.0048968	0.0211666	0.012808	0.000308141	-0.00459459	0.0208168	-0.00839985	0.0261824	0.0213853	0.0197312	0.0219976	-0.0027621	-0.00218942	0.002979	0.00529624	0.00624958	0.00711529	0.014053	0.0123106	0.00023167	4.48543e-05	0.0033369	0.00169164	0.00485928	0.00493962	0.00698109	0.00550853	-0.00335849	-0.00125747	0.00962384	0.0138439	0.0126727	0.0127615	0.033447	0.0191928	0.000710793	-5.6161e-06	0.0071167	0.0058138	0.00757859	0.00581036	-0.0120466	-0.00983911	2.7414e-06
aKG 351 (M5)	-0.000188578	0.000325197	4.64999e-05	-0.00123611	-0.00717185	-0.00105567	-0.00197866	0.000922666	0.00154074	0.000107377	-0.010002	-0.00378883	0.00392148	0.0108683	0.00516334	-0.00342004	0.000518235	0.000178566	0.00121491	8.50711e-05	0.00136691	0.000328543	0.00409822	0.00152205	-0.000552544	-0.000547658	-0.000625266	-0.000157774	0.000780244	0.000654168	0.00164077	0.000925289	0.000796818	-7.83798e-05	-0.00751925	-0.00843986	-0.0076799	-0.0103851	-0.00394151	-0.00998963	-0.000610453	-0.000568144	-0.00112746	-0.000721541	-0.00031141	0.00126596	0.00102164	-0.00364904	-3.1391e-06
Atom Percent Enrichment	0.00242804	0.00531139	0.066748	0.0639313	0.091241	0.0927641	0.126177	0.125618	-0.00405709	-0.0001146	0.0785363	0.0565755	0.139335	0.132974	0.151109	0.148515	-0.00307393	-0.00383127	0.0666761	0.0653379	0.0953613	0.0936895	0.115545	0.108933	0.000318385	0.000460098	0.0579515	0.0589795	0.0946333	0.0949289	0.112894	0.111714	0.00206156	-0.00143025	0.0807379	0.0749008	0.0994838	0.101264	0.0960151	0.0606628	-5.09579e-05	0.000817634	0.0629221	0.0614508	0.0786677	0.0790353	0.0398672	0.068535	-0.0002473
Gln 431 (M0)	0.6279	0.6264	0.5348	0.5351	0.4804	0.4793	0.4311	0.4324	0.623	0.6271	0.5217	0.5207	0.4437	0.4436	0.4061	0.4072	0.6239	0.6213	0.5354	0.5324	0.4674	0.4708	0.4494	0.447	0.6272	0.6249	0.5483	0.5482	0.4705	0.4731	0.4359	0.4364	0.6269	0.6279	0.4964	0.4938	0.4505	0.4513	0.4124	0.4118	0.6287	0.6258	0.5329	0.5322	0.4821	0.4836	0.4536	0.4522	0.6339
Gln 432 (M1)	0.2307	0.2297	0.2313	0.2319	0.2347	0.2358	0.2378	0.2366	0.2361	0.2326	0.2328	0.2292	0.2313	0.2313	0.2323	0.2307	0.2322	0.2344	0.2327	0.2332	0.2373	0.2344	0.2428	0.2408	0.2302	0.2324	0.2338	0.2358	0.2445	0.2428	0.2483	0.2487	0.2343	0.2284	0.2357	0.2338	0.2384	0.2384	0.2395	0.2392	0.2299	0.2335	0.2333	0.2325	0.2382	0.2374	0.2387	0.2374	0.2294
Gln 433 (M2)	0.1078	0.1082	0.1486	0.1472	0.1662	0.1677	0.1838	0.1832	0.106	0.1069	0.1525	0.1557	0.1807	0.1798	0.193	0.1916	0.11	0.1116	0.1479	0.1491	0.172	0.1706	0.1751	0.1779	0.1078	0.1076	0.1417	0.1433	0.1698	0.1712	0.1825	0.1818	0.1083	0.1108	0.1626	0.1632	0.1785	0.1781	0.191	0.1895	0.1068	0.1073	0.1493	0.1482	0.1672	0.1672	0.1767	0.1769	0.1058
Gln 434 (M3)	0.0263	0.0272	0.0576	0.0582	0.0768	0.0764	0.0938	0.0939	0.0278	0.0261	0.0625	0.0627	0.0902	0.0911	0.1059	0.1059	0.0271	0.0258	0.0575	0.0572	0.0807	0.0817	0.0858	0.0869	0.0267	0.0271	0.0531	0.0511	0.0755	0.0737	0.0875	0.0868	0.0245	0.0263	0.0691	0.073	0.0872	0.087	0.1008	0.1044	0.0268	0.0264	0.0573	0.0582	0.0741	0.074	0.0856	0.0869	0.0257
Gln 435 (M4)	0.0061	0.0077	0.0199	0.0194	0.0288	0.0284	0.0363	0.0369	0.0064	0.0062	0.0221	0.0224	0.0366	0.0361	0.0423	0.0433	0.0068	0.0069	0.0197	0.0201	0.0297	0.0295	0.0321	0.0324	0.0067	0.0069	0.0173	0.0162	0.0274	0.0268	0.0317	0.0321	0.006	0.0053	0.026	0.0261	0.0323	0.0318	0.0394	0.0385	0.0068	0.0066	0.0194	0.0212	0.0271	0.0265	0.0333	0.0328	0.0053
Gln 436 (M5)	0.0012	0.0008	0.0059	0.0061	0.0096	0.0095	0.0134	0.0134	0.0007	0.0012	0.0076	0.0074	0.0136	0.0139	0.0159	0.0167	0	0	0.0054	0.0064	0.0101	0.0102	0.0114	0.0117	0.0013	0.0011	0.0048	0.0043	0.0096	0.0098	0.0111	0.0111	0.0001	0.0014	0.0079	0.0083	0.0104	0.0105	0.0133	0.0129	0.001	0.0004	0.0063	0.0062	0.0093	0.0085	0.0112	0.0117	0
Gln 437 (M6)	0	0	0.0019	0.0021	0.0035	0.003	0.0038	0.0036	0	0	0.0008	0.0018	0.0039	0.004	0.0044	0.0046	0	0	0.0013	0.0016	0.0027	0.0027	0.0033	0.0032	0	0	0.0009	0.0011	0.0026	0.0026	0.003	0.0031	0	0	0.0023	0.0019	0.0027	0.0028	0.0035	0.0035	0	0	0.0014	0.0016	0.002	0.0027	0.0009	0.0022	0
Corrected Data
Gln 431 (M0)	1.00561	1.00329	0.855928	0.856297	0.768385	0.766732	0.689522	0.691692	0.997795	1.00424	0.83546	0.833519	0.709655	0.709578	0.649494	0.651137	0.999265	0.995105	0.857246	0.852214	0.747976	0.753408	0.718985	0.715178	1.00461	1.00085	0.878026	0.877657	0.752922	0.756982	0.697402	0.698181	1.00394	1.00546	0.794429	0.790337	0.720915	0.722212	0.659852	0.658935	1.00693	1.0023	0.853162	0.851857	0.771651	0.773847	0.726574	0.723742	1.01512
Gln 432 (M1)	-0.00806782	-0.00876039	0.0482368	0.049002	0.0859077	0.088314	0.120102	0.117447	0.00340219	-0.00458144	0.0584345	0.0533049	0.102329	0.102401	0.126246	0.123039	-0.00331202	0.00172037	0.0501175	0.0526795	0.0977955	0.0911827	0.117172	0.115438	-0.00844453	-0.00359003	0.0441935	0.0474098	0.107348	0.103098	0.133902	0.134234	-0.00176958	-0.0117098	0.0780281	0.0765726	0.10958	0.109108	0.133951	0.133842	-0.00981152	-0.00238278	0.0525496	0.0516878	0.0904994	0.0883175	0.108317	0.107003	-0.0136955
Gln 433 (M2)	0.00246481	0.0037461	0.0711498	0.0685894	0.0997093	0.101504	0.128201	0.127892	-0.00317086	1.30258e-05	0.0771695	0.0842613	0.126361	0.124972	0.147107	0.145742	0.00527649	0.00667049	0.0692501	0.070991	0.108075	0.10735	0.110754	0.116416	0.00278947	0.00134574	0.0582048	0.0595606	0.100347	0.103352	0.119946	0.118591	0.00124662	0.00847888	0.0926754	0.0948514	0.118555	0.117887	0.139581	0.137446	0.00131069	0.000197414	0.0712319	0.0699891	0.0992539	0.0996016	0.115505	0.116544	-0.000257768
Gln 434 (M3)	0.000339712	0.00149836	0.0215936	0.0232662	0.0386332	0.0370739	0.052563	0.0531938	0.00306849	0.000365917	0.0262905	0.0250029	0.0497353	0.0516221	0.0652878	0.0661969	7.43275e-05	-0.00308728	0.0217775	0.0204628	0.0406825	0.0433508	0.0456017	0.0457703	0.000953831	0.00143001	0.018964	0.0148567	0.0335566	0.0302361	0.0431464	0.0424463	-0.00299531	-0.00116497	0.0294717	0.0351673	0.0462428	0.0461949	0.0584035	0.0647915	0.00175334	0.000489346	0.0205317	0.0225364	0.0338056	0.0337684	0.0449368	0.0468107	0.000897373
Gln 435 (M4)	-0.000332103	0.00157232	0.00178425	0.000825544	0.00438816	0.00394383	0.00598473	0.00682964	-0.000263243	8.29819e-05	0.00241217	0.00237248	0.00819827	0.00702053	0.00795461	0.00949447	0.000254826	0.00109953	0.00164787	0.00236648	0.00348053	0.00259146	0.00456689	0.00416462	0.000352862	0.000576106	0.000736128	9.6593e-05	0.00319569	0.00304046	0.00286303	0.00390926	0.000611221	-0.00187361	0.00442027	0.00239149	0.0036905	0.00305532	0.00668602	0.00350163	0.00050329	0.000559028	0.00123288	0.0035509	0.0033147	0.00240532	0.00620045	0.0046683	-0.0011819
Gln 436 (M5)	0.000274747	-0.00117661	0.000540895	0.000982402	0.00134622	0.00150175	0.00314759	0.0028059	-0.000816598	0.000196044	0.00189734	0.00159057	0.00336458	0.00396267	0.00359301	0.00422912	-0.00183368	-0.00170488	-0.000146144	0.00125845	0.00170165	0.00180369	0.00230967	0.00268184	9.83017e-05	-0.000337502	0.000117247	0.000133676	0.00234959	0.00314352	0.00234202	0.00215426	-0.00118836	0.00112972	0.000497758	0.000815025	0.000760685	0.00115564	0.00135496	0.000873521	-0.000468268	-0.00121643	0.00146047	0.000287122	0.00198278	0.00107425	0.00148662	0.00241692	-0.00121719
Gln 437 (M6)	-0.000289949	-0.000170971	0.00076692	0.00103793	0.00163097	0.000930299	0.000479444	0.00013925	-1.45065e-05	-0.000313599	-0.00166361	-5.09679e-05	0.000356813	0.000444276	0.000318677	0.000160992	0.000274847	0.00019703	0.000106735	2.80869e-05	0.000288734	0.000313246	0.00061127	0.00035111	-0.000363692	-0.000269381	-0.000241583	0.000286003	0.000280677	0.000147737	0.000398844	0.000484305	0.000154191	-0.000317988	0.000477734	-0.000135141	0.00025611	0.000387568	0.000171051	0.000610158	-0.000219524	5.68513e-05	-0.000168205	9.17806e-05	-0.00050738	0.000986367	-0.00301915	-0.001184	0.000330567
Atom Percent Enrichment	-0.000414748	0.000726627	0.0530318	0.0528387	0.0851019	0.0851655	0.114774	0.114832	0.000225995	-0.000429098	0.0621561	0.0628558	0.110774	0.111021	0.133221	0.134447	-0.000137028	0.00033464	0.0519622	0.0543616	0.0916847	0.0910638	0.10106	0.10313	0.00037977	0.00080168	0.0442052	0.0424312	0.0866485	0.0856781	0.105279	0.105032	-0.00235184	-1.85444e-05	0.0743927	0.0770837	0.100797	0.100293	0.124369	0.124297	-0.000451657	-0.000873193	0.0537685	0.0549829	0.0827194	0.0807637	0.101274	0.102256	-0.0044665
Glu 330 (M0)	0.6933	0.6931	0.6107	0.6042	0.5583	0.5402	0.5091	0.5058	0.6954	0.6892	0.5209	0.5466	0.4775	0.4788	0.4492	0.4543	0.662	0.6818	0.5844	0.587	0.5364	0.5366	0.4172	0.4838	0.6937	0.694	0.5762	0.5894	0.5323	0.5387	0.5056	0.5022	0	0	0	0	0.4684	0.4819	0	0	0.7048	0.6995	0.5945	0.5931	0.5284	0.5447	0.5473	0.5549	0.7039
Glu 331 (M1)	0.2014	0.1996	0.2145	0.2116	0.2229	0.2189	0.23	0.2289	0.1968	0.2007	0.1892	0.2076	0.2143	0.2181	0.2225	0.2255	0.198	0.2127	0.2086	0.2069	0.2194	0.2256	0.1803	0.2094	0.1977	0.1971	0.2	0.209	0.2238	0.225	0.2284	0.2284	0	0	0	0	0.1969	0.2083	0	0	0.1969	0.196	0.2122	0.2116	0.2226	0.2201	0.2231	0.2283	0.2017
Glu 332 (M2)	0.0844	0.0862	0.1465	0.144	0.17	0.1705	0.1841	0.1887	0.0873	0.0873	0.1877	0.17	0.1949	0.1864	0.2118	0.2093	0.0808	0.0682	0.153	0.1543	0.1775	0.1754	0.1936	0.2025	0.0888	0.0888	0.1576	0.1596	0.175	0.175	0.184	0.1784	0	0	0	0	0.1828	0.1815	0	0	0.0885	0.0899	0.1473	0.1442	0.1647	0.1601	0.1588	0.155	0.0769
Glu 333 (M3)	0.0154	0.0161	0.0203	0.0289	0.0355	0.045	0.0514	0.0498	0.0179	0.017	0.067	0.0343	0.061	0.0615	0.0637	0.0644	0.0191	0.0151	0.0357	0.0353	0.0467	0.0436	0.1314	0.0691	0.0154	0.0154	0.0446	0.038	0.0418	0.0432	0.0499	0.0545	0	0	0	0	0.0971	0.0704	0	0	0.0098	0.0143	0.0321	0.0349	0.0492	0.052	0.0426	0.0416	0.0144
Glu 334 (M4)	0.0055	0.005	0.008	0.0113	0.0134	0.0186	0.0253	0.0268	0.0025	0.0049	0.034	0.0304	0.0396	0.0414	0.0376	0.037	0.0213	0.0149	0.0182	0.0165	0.0195	0.0188	0.0613	0.0332	0.0044	0.0047	0.0192	0.0039	0.0215	0.0168	0.0252	0.027	0	0	0	0	0.0478	0.0465	0	0	0	0.0003	0.0139	0.0163	0.0233	0.0179	0.0193	0.0138	0.0026
Glu 335 (M5)	0	0	0	0	0	0.0046	0	0	0	0.001	0.0011	0.0111	0.01	0.0086	0.0106	0.0088	0.0162	0.0073	0	0	0.0005	0.0001	0.0116	0	0	0	0.0024	0	0.0049	0.0013	0.0034	0.0081	0	0	0	0	0.0069	0.0074	0	0	0	0	0	0	0.0078	0.004	0.0088	0.0063	0.0004
Glu 336 (M6)	0	0	0	0	0	0.0023	0	0	0	0	0	0	0.0026	0.0052	0.0046	0.0008	0.0027	0	0	0	0	0	0.0045	0.0021	0	0	0	0	0.0006	0	0.0034	0.0013	0	0	0	0	0	0.0039	0	0	0	0	0	0	0.0039	0.0011	0	0	0
Corrected Data
Glu 330 (M0)	0.984031	0.983734	0.866782	0.857622	0.792405	0.766072	0.722904	0.718168	0.987037	0.978069	0.739778	0.775936	0.677421	0.678627	0.636699	0.644768	0.938514	0.967737	0.829723	0.833297	0.761486	0.761693	0.59173	0.686432	0.984569	0.985001	0.817955	0.836536	0.755521	0.764688	0.716988	0.71264	#VALUE!	#VALUE!	#VALUE!	#VALUE!	0.665319	0.683514	#VALUE!	#VALUE!	1.00022	0.992705	0.843901	0.841878	0.749075	0.772948	0.776866	0.787614	0.999106
Glu 331 (M1)	0.00367747	0.00123078	0.0553195	0.0538686	0.0882056	0.0898003	0.118033	0.117808	-0.00362634	0.00434449	0.0559815	0.0714474	0.108608	0.113311	0.131384	0.133714	0.0114903	0.0241726	0.0576417	0.0541995	0.0921272	0.100743	0.0851362	0.0992075	-0.00167827	-0.00264142	0.048858	0.0561709	0.0999378	0.099057	0.11704	0.118487	#VALUE!	#VALUE!	#VALUE!	#VALUE!	0.0879584	0.0983963	#VALUE!	#VALUE!	-0.00726884	-0.00639907	0.0586193	0.0583381	0.0997016	0.0897312	0.0929232	0.0971599	-0.000168344
Glu 332 (M2)	0.011591	0.0147883	0.0962111	0.0941241	0.127783	0.130643	0.146734	0.153671	0.0172946	0.0160528	0.166911	0.134147	0.168902	0.155448	0.190213	0.185631	0.00916894	-0.0147636	0.108614	0.110949	0.140469	0.135155	0.182545	0.181088	0.0191019	0.0193195	0.118618	0.117384	0.135454	0.134746	0.147157	0.139619	#VALUE!	#VALUE!	#VALUE!	#VALUE!	0.159333	0.152383	#VALUE!	#VALUE!	0.0185337	0.0210403	0.0988818	0.0948594	0.121621	0.115642	0.112614	0.105027	0.000624551
Glu 333 (M3)	-0.00129229	-0.000909922	-0.0198007	-0.00710933	-0.00915178	0.00344215	0.00601941	0.00211283	0.00134541	-0.000220193	0.0282763	-0.0104085	0.0151841	0.0188065	0.0116628	0.013542	0.00446751	0.00339724	-0.00140132	-0.00228284	0.00311713	-0.000650892	0.112319	0.0239215	-0.00271745	-0.00268312	0.00933438	-0.000535826	-0.00300468	-0.000975706	0.0039734	0.0122465	#VALUE!	#VALUE!	#VALUE!	#VALUE!	0.069792	0.0333358	#VALUE!	#VALUE!	-0.00998778	-0.00440767	-0.00418259	0.000784466	0.0108524	0.0169003	0.00439419	0.00435932	0.000313523
Glu 334 (M4)	0.00333242	0.00228094	0.00231532	0.0038796	0.0034498	0.0071016	0.0136056	0.0159457	-0.00185697	0.00180569	0.0188974	0.0265938	0.0287888	0.031534	0.0244869	0.0236579	0.0235739	0.0172587	0.0103955	0.00811908	0.00741798	0.00778693	0.0331841	0.0168225	0.00153609	0.00192943	0.00824732	-0.0101397	0.0120499	0.00521288	0.0139333	0.0150694	#VALUE!	#VALUE!	#VALUE!	#VALUE!	0.027668	0.0354148	#VALUE!	#VALUE!	-0.00250938	-0.00374644	0.0061592	0.00858869	0.0123933	0.00427328	0.00955754	0.00274093	0.000111353
Glu 335 (M5)	-0.00127734	-0.00110729	-0.000781426	-0.00237228	-0.00273077	0.00133795	-0.00709303	-0.00739295	-0.000354417	0.000269287	-0.00924635	0.00680497	0.00155755	-0.00116237	0.0033286	0.000986024	0.0152591	0.00519444	-0.00477188	-0.00416267	-0.00444857	-0.00464424	-0.00707606	-0.0101671	-0.000813527	-0.000913425	-0.00219089	-1.78094e-05	0.00107533	-0.00234458	-0.00235599	0.00306625	#VALUE!	#VALUE!	#VALUE!	#VALUE!	-0.00753453	-0.00506552	#VALUE!	#VALUE!	0.000909594	0.00061516	-0.0033075	-0.00431766	0.00379251	0.000140553	0.00665918	0.00503493	8.62171e-05
Glu 336 (M6)	-6.26195e-05	-1.64983e-05	-4.56612e-05	-1.28336e-05	3.96872e-05	0.00160348	-0.000202474	-0.000313477	0.000160374	-0.000320738	-0.00059808	-0.00452113	-0.000461743	0.00343561	0.00222535	-0.00229862	-0.00247422	-0.00299596	-0.00020103	-0.000118865	-0.000168646	-8.24292e-05	0.00216253	0.00269606	2.51978e-06	-1.23624e-05	-0.000821635	0.000602192	-0.00103335	-0.000383659	0.00326383	-0.00112821	#VALUE!	#VALUE!	#VALUE!	#VALUE!	-0.00253606	0.0020216	#VALUE!	#VALUE!	0.000100118	0.000192864	-7.0865e-05	-0.00013134	0.00256474	0.000364478	-0.00301495	-0.00193575	-7.34666e-05
Atom Percent Enrichment	0.00907807	0.00930035	0.0494003	0.0590768	0.0825287	0.0974548	0.120995	0.123818	0.00689278	0.0107531	0.137555	0.103723	0.15178	0.151691	0.161187	0.160058	0.0343816	0.018468	0.0780618	0.0754312	0.103022	0.100062	0.22998	0.150109	0.00862938	0.00891648	0.0867716	0.0621931	0.102508	0.0966182	0.119752	0.123686	#VALUE!	#VALUE!	#VALUE!	#VALUE!	0.181668	0.161207	#VALUE!	#VALUE!	-0.00255056	0.00186819	0.067118	0.0711912	0.106268	0.0972023	0.0923912	0.0828139	0.000616685
Glu 432 (M0)	0.6249	0.6257	0.5304	0.525	0.4699	0.4669	0.4299	0.4258	0.6275	0.6286	0.4912	0.491	0.4195	0.4184	0.3899	0.3901	0.6244	0.6313	0.5145	0.5144	0.46	0.4624	0.4316	0.4435	0.625	0.6265	0.5266	0.5306	0.4659	0.4611	0.4304	0.4298	0	0	0	0	0.4459	0.4488	0	0	0.6342	0.6286	0.5288	0.5233	0.4817	0.487	0.4684	0.4739	0.6249
Glu 433 (M1)	0.2262	0.2305	0.2356	0.23	0.2347	0.2348	0.2352	0.2366	0.2284	0.2269	0.2247	0.2243	0.23	0.2259	0.2273	0.2283	0.2394	0.2306	0.2352	0.2377	0.2356	0.2395	0.2288	0.2357	0.2326	0.2288	0.227	0.2316	0.2418	0.2406	0.2493	0.2462	0	0	0	0	0.2284	0.2305	0	0	0.235	0.233	0.2351	0.2312	0.2406	0.2392	0.2362	0.2356	0.2324
Glu 434 (M2)	0.1076	0.1057	0.1501	0.1561	0.1704	0.1717	0.1825	0.1828	0.1081	0.1084	0.1527	0.1618	0.1784	0.1879	0.1875	0.1905	0.0962	0.1063	0.147	0.1433	0.1666	0.1636	0.1721	0.1595	0.1073	0.1094	0.1405	0.1383	0.1599	0.1667	0.1751	0.1787	0	0	0	0	0.1704	0.1704	0	0	0.0984	0.1035	0.1382	0.1447	0.1577	0.1554	0.1621	0.1649	0.1088
Glu 435 (M3)	0.0296	0.0262	0.0603	0.063	0.0767	0.0847	0.0975	0.0973	0.0281	0.0294	0.0777	0.0751	0.1025	0.1026	0.1144	0.1171	0.0308	0.0288	0.0672	0.0661	0.0864	0.0837	0.0974	0.0936	0.0266	0.0267	0.07	0.0669	0.081	0.0832	0.0916	0.0937	0	0	0	0	0.0976	0.0962	0	0	0.0239	0.0265	0.0625	0.0662	0.0748	0.0722	0.0756	0.0764	0.0263
Glu 436 (M4)	0.0063	0.0078	0.0192	0.0207	0.0332	0.0301	0.0387	0.0374	0.0079	0.006	0.033	0.0321	0.0435	0.0414	0.0495	0.0482	0.0065	0.0029	0.0239	0.0269	0.034	0.032	0.0402	0.037	0.0077	0.0075	0.0254	0.0224	0.0333	0.0313	0.0368	0.034	0	0	0	0	0.0366	0.0336	0	0	0.0066	0.0073	0.0241	0.0242	0.0254	0.0274	0.0339	0.0288	0.0063
Glu 437 (M5)	0.0032	0.0035	0.0044	0.0052	0.012	0.0092	0.0132	0.015	0	0.0007	0.0164	0.0145	0.0192	0.0182	0.0212	0.0203	0.0027	0	0.0086	0.0091	0.0133	0.013	0.0192	0.0201	0.0009	0.001	0.0079	0.008	0.0127	0.0128	0.014	0.0123	0	0	0	0	0.0134	0.0139	0	0	0.0016	0.0007	0.0084	0.0083	0.0123	0.0128	0.0174	0.0115	0.0011
Glu 438 (M6)	0.0006	0.0004	0	0	0.0032	0.0027	0.0029	0.0038	0	0	0.0001	0.0012	0.0048	0.004	0.007	0.0049	0	0	0.0025	0.0023	0.0033	0.0054	0.0053	0.0059	0	0	0.0022	0.0022	0.0049	0.0043	0.0018	0.0039	0	0	0	0	0.0048	0.0049	0	0	0	0.0002	0.0024	0.0014	0.0048	0.0037	0.0005	0.0038	0.0002
Glu 439 (M7)	0.0017	0.0002	0	0	0	0	0	0.0012	0	0	0.0042	0	0.0022	0.0016	0.0031	0.0007	0	0	0.0011	0.0001	0.0008	0.0004	0.0054	0.0048	0	0	0.0003	0	0.0004	0	0.001	0.0014	0	0	0	0	0.0029	0.0016	0	0	0.0003	0.0002	0.0005	0.0008	0.0027	0.0023	0.0058	0.0052	0
Corrected Data
Glu 432 (M0)	0.998464	1.00064	0.848283	0.839671	0.751587	0.746691	0.687748	0.680808	1.00347	1.00526	0.784276	0.785562	0.670347	0.668853	0.622869	0.623849	0.998628	1.00965	0.822457	0.822824	0.735544	0.739479	0.688619	0.707778	0.999415	1.00202	0.842199	0.848659	0.745156	0.737575	0.68819	0.686986	#VALUE!	#VALUE!	#VALUE!	#VALUE!	0.71217	0.717375	#VALUE!	#VALUE!	1.01411	1.00515	0.84558	0.83659	0.769451	0.778126	0.747365	0.755935	0.999362
Glu 433 (M1)	-0.00997169	-0.00364921	0.0605155	0.0548364	0.0947119	0.0966235	0.119074	0.123635	-0.00803032	-0.0110509	0.0662349	0.0658552	0.116836	0.111046	0.12994	0.131542	0.011196	-0.00678753	0.0692086	0.0732676	0.101935	0.106705	0.107657	0.111586	8.48686e-05	-0.00681005	0.0491465	0.0540733	0.108295	0.109236	0.14102	0.136421	#VALUE!	#VALUE!	#VALUE!	#VALUE!	0.0987299	0.100423	#VALUE!	#VALUE!	-0.00153339	-0.00140112	0.060656	0.0577106	0.0969731	0.0916696	0.0977298	0.0935275	-0.00017265
Glu 434 (M2)	0.00286919	-0.00257966	0.0697659	0.0826482	0.105699	0.107844	0.126791	0.126645	0.00225405	0.00350491	0.0822206	0.0968732	0.123799	0.14109	0.141295	0.145562	-0.0223982	-0.00203499	0.0660675	0.0589116	0.0998116	0.0927817	0.113721	0.0894663	-0.00122036	0.00412309	0.0598316	0.053552	0.0854902	0.0971124	0.10715	0.11453	#VALUE!	#VALUE!	#VALUE!	#VALUE!	0.110547	0.109274	#VALUE!	#VALUE!	-0.0170563	-0.00760895	0.0515137	0.0642041	0.0816694	0.0785667	0.0917278	0.0960806	0.00124581
Glu 435 (M3)	0.00566287	0.00119465	0.0245354	0.0255456	0.0357797	0.0472884	0.0592838	0.0584697	0.00306777	0.00507427	0.0486228	0.0397767	0.0689625	0.064208	0.0810289	0.0836126	0.0128117	0.00518383	0.036065	0.0362215	0.052259	0.0495834	0.0651046	0.0662422	0.000771305	0.000116984	0.0451193	0.0414254	0.0474487	0.0469991	0.0532322	0.0546837	#VALUE!	#VALUE!	#VALUE!	#VALUE!	0.067183	0.0650861	#VALUE!	#VALUE!	0.00174517	0.00284026	0.0343345	0.036495	0.0399076	0.0375151	0.0383053	0.0383456	-0.000498249
Glu 436 (M4)	-0.00195482	0.00246266	-0.000639811	-0.000457712	0.0108191	0.00182942	0.00762164	0.00578392	0.00134938	-0.00233418	0.0107041	0.0100326	0.0123882	0.00824271	0.0146157	0.011077	-0.000784108	-0.00643082	0.00317696	0.00873649	0.00732264	0.0060768	0.0103498	0.00867443	0.00209676	0.00139331	0.00405314	0.00146166	0.00985042	0.0051035	0.00902523	0.00323199	#VALUE!	#VALUE!	#VALUE!	#VALUE!	0.00484534	0.00109201	#VALUE!	#VALUE!	0.00256586	0.00182474	0.00653791	0.00410855	0.00106004	0.00555776	0.0130972	0.00465896	-7.41864e-06
Glu 437 (M5)	0.00294845	0.0028196	-0.00153764	-0.000958536	0.00297965	-0.000251243	0.00122032	0.00463495	-0.00256025	-0.000642327	0.00869505	0.006937	0.00736165	0.0073673	0.00705389	0.00629055	0.00143362	-0.000229073	0.00185694	0.00102127	0.00365517	0.00424253	0.00901894	0.0115882	-0.0010159	-0.000672335	-0.00052641	0.00122939	0.00314981	0.00448674	0.00345095	0.00229137	#VALUE!	#VALUE!	#VALUE!	#VALUE!	0.00189764	0.0042444	#VALUE!	#VALUE!	0.000319689	-0.00131457	0.00132389	0.00118573	0.00677374	0.00660291	0.0104568	0.00413318	8.15664e-05
Glu 438 (M6)	-0.000180205	-0.000932029	-0.00121593	-0.00156836	-0.000344679	0.000891381	-0.000795954	-0.000207228	0.000239138	0.000126318	-0.00705418	-0.00453619	-0.000932768	-0.00146935	0.00154517	-0.000963129	-0.00085494	0.000672435	0.000506726	-0.000344758	-0.000410843	0.00292905	-0.000158068	0.000361126	-0.000265668	-0.000278956	0.000429648	0.000456809	0.00206816	0.00138997	-0.00303243	0.00130747	#VALUE!	#VALUE!	#VALUE!	#VALUE!	0.00217502	0.00225617	#VALUE!	#VALUE!	-0.000657959	0.000157812	0.00020032	-0.00107548	0.00244634	0.000255547	-0.00713553	0.00113826	4.15289e-05
Glu 439 (M7)	0.00216241	4.31108e-05	0.000293714	0.000283958	-0.00123146	-0.000915974	-0.00094262	0.000230678	0.000215174	6.4184e-05	0.00630031	-0.00050051	0.00123923	0.000662369	0.00165275	-0.000969477	-3.22514e-05	-2.49117e-05	0.00066096	-0.000638217	-0.000116459	-0.00179763	0.00568794	0.00430392	0.000134212	0.000109133	-0.000252839	-0.000857409	-0.00145799	-0.00190351	0.000964302	0.000549412	#VALUE!	#VALUE!	#VALUE!	#VALUE!	0.00245235	0.000249354	#VALUE!	#VALUE!	0.000505296	0.000349891	-0.000146746	0.000781616	0.00171844	0.00170615	0.00845353	0.00618115	-5.23558e-05
Atom Percent Enrichment	0.00393566	0.00374482	0.0526812	0.0580292	0.0943246	0.0920475	0.117419	0.119729	-0.000344532	-0.000273318	0.0925673	0.0907495	0.131536	0.131131	0.14987	0.149853	0.00177329	-0.00443493	0.0663062	0.0679615	0.10118	0.0973077	0.123381	0.116377	0.000653128	0.000799725	0.0635497	0.0594894	0.0953545	0.0974613	0.113675	0.110783	#VALUE!	#VALUE!	#VALUE!	#VALUE!	0.110048	0.107964	#VALUE!	#VALUE!	-0.00370972	-0.00147443	0.0598916	0.0635933	0.0836287	0.0833188	0.100155	0.0880054	0.000240475
Glycerol 377 (M0)	0.6454	0.6464	0.6196	0.6188	0.6068	0.6074	0.5884	0.5879	0.6487	0.6463	0.6294	0.6251	0.6094	0.6116	0.603	0.6	0.6469	0.6492	0.6304	0.63	0.6211	0.6207	0.6	0.5996	0.6453	0.6452	0.6225	0.6242	0.6053	0.6058	0.5959	0.5945	0.6466	0.6465	0.6256	0.6253	0.6174	0.6168	0.5995	0.5986	0.6453	0.6464	0.6134	0.6123	0.6044	0.603	0.4639	0.4642	0.6487
Glycerol 378 (M1)	0.2221	0.2212	0.2136	0.2133	0.2118	0.2111	0.2079	0.2083	0.2205	0.2214	0.2137	0.2172	0.2127	0.2138	0.2096	0.2117	0.221	0.2192	0.217	0.2169	0.2143	0.2144	0.2117	0.2115	0.2219	0.2217	0.2165	0.216	0.2129	0.213	0.2098	0.211	0.2209	0.2207	0.2164	0.2163	0.2179	0.2176	0.2156	0.2152	0.2213	0.2213	0.2144	0.215	0.2118	0.2122	0.1905	0.1909	0.2206
Glycerol 379 (M2)	0.1029	0.1029	0.1017	0.1023	0.1024	0.1021	0.1021	0.1016	0.1016	0.1024	0.1022	0.103	0.1044	0.1034	0.1055	0.1072	0.103	0.1019	0.1025	0.1023	0.1034	0.1033	0.1039	0.1047	0.1027	0.1031	0.103	0.1022	0.1045	0.1039	0.1044	0.1049	0.1026	0.1027	0.1036	0.1044	0.105	0.1061	0.109	0.1096	0.1035	0.1027	0.1063	0.1075	0.1049	0.1063	0.1176	0.1169	0.1016
Glycerol 380 (M3)	0.0232	0.023	0.0475	0.0476	0.057	0.0573	0.0725	0.0726	0.023	0.0234	0.0409	0.041	0.0531	0.0513	0.059	0.0576	0.023	0.0245	0.0373	0.0382	0.0444	0.0449	0.0606	0.0604	0.0237	0.0236	0.0426	0.0422	0.0559	0.0557	0.0644	0.0639	0.0236	0.0236	0.04	0.0401	0.0439	0.0439	0.0546	0.0553	0.0234	0.0233	0.0478	0.0473	0.0566	0.0571	0.1595	0.1591	0.0228
Glycerol 381 (M4)	0.0056	0.0056	0.0133	0.0135	0.0162	0.0161	0.0211	0.0214	0.0054	0.0057	0.0105	0.0105	0.0151	0.0148	0.0167	0.0171	0.0057	0.0049	0.0098	0.0097	0.0124	0.0125	0.0175	0.0175	0.0055	0.0054	0.0116	0.0115	0.0157	0.0157	0.0184	0.0186	0.0053	0.0055	0.0108	0.0105	0.012	0.0119	0.0158	0.0158	0.0055	0.0056	0.0136	0.0133	0.0163	0.0155	0.0485	0.048	0.0053
Glycerol 382 (M5)	0.0008	0.0009	0.0045	0.0045	0.0058	0.0059	0.0081	0.0082	0.0009	0.0008	0.0034	0.0031	0.0053	0.0051	0.0061	0.0064	0.0004	0.0003	0.0029	0.0029	0.0043	0.0042	0.0064	0.0065	0.0009	0.0009	0.0038	0.0039	0.0057	0.0058	0.007	0.0071	0.001	0.001	0.0035	0.0033	0.0037	0.0038	0.0056	0.0056	0.001	0.0009	0.0045	0.0045	0.006	0.0058	0.0201	0.0209	0.0008
Corrected Data
Glycerol 377 (M0)	1.00352	1.00501	0.962248	0.961195	0.942257	0.943254	0.913037	0.912301	1.0085	1.00492	0.977907	0.97156	0.946394	0.949838	0.936377	0.931403	1.00604	1.00978	0.979756	0.979081	0.964852	0.964202	0.931431	0.930661	1.00334	1.00328	0.967116	0.969697	0.939937	0.940752	0.925107	0.922763	1.00531	1.00515	0.972087	0.971732	0.959372	0.958202	0.930809	0.929441	1.00327	1.00483	0.952801	0.951171	0.93841	0.936467	0.717683	0.71793	1.00885
Glycerol 378 (M1)	-0.00185086	-0.00376705	-0.00119329	-0.00122919	0.00284462	0.00145063	0.00662817	0.00750802	-0.00606698	-0.00340647	-0.00625137	0.00141486	0.00284557	0.00336615	0.00148491	0.00630292	-0.00434179	-0.00833631	-0.00171185	-0.00165273	-0.00091548	-0.00054913	0.00630312	0.00620752	-0.0021052	-0.00235983	0.00172098	4.86558e-05	0.0053315	0.00521959	0.00556407	0.00814922	-0.00433482	-0.00458917	-8.1043e-05	-7.52144e-05	0.0065855	0.00644186	0.0125597	0.012424	-0.00302782	-0.00361258	0.00333174	0.00483883	0.00411959	0.00547922	0.0459011	0.0463403	-0.00591524
Glycerol 379 (M2)	-0.00152527	-0.00113593	0.00277202	0.00389284	0.0056402	0.00549947	0.00844112	0.00751347	-0.00291646	-0.00199173	0.0028018	0.00253472	0.00804121	0.005809	0.0117345	0.0134521	-0.000916831	-0.00183315	0.00150791	0.00128244	0.00489619	0.00472089	0.00843986	0.00978302	-0.00172062	-0.00100326	0.00307078	0.00199112	0.00837518	0.00737821	0.0104513	0.0106953	-0.00145329	-0.00119226	0.00381913	0.00510782	0.00575332	0.00761844	0.0142388	0.015417	-0.000197641	-0.00149089	0.00978717	0.0113828	0.00960412	0.0116275	0.049315	0.0480172	-0.00296845
Glycerol 380 (M3)	-0.000379481	-0.000564955	0.0361096	0.0359581	0.0495543	0.0502359	0.0723408	0.0726837	0.000232984	0.000261181	0.0264257	0.0257262	0.0427824	0.0405904	0.0510298	0.0477797	-0.000574701	0.00246586	0.0206756	0.0221137	0.0306512	0.0314239	0.053896	0.0531927	0.00048054	0.000144937	0.028047	0.0279535	0.046724	0.0467345	0.0593066	0.058144	0.000516306	0.000477516	0.0240068	0.0237628	0.0286807	0.0281306	0.0420904	0.0428374	-0.000316585	-2.33592e-05	0.0339653	0.0325335	0.0476126	0.0475961	0.190135	0.189803	-7.54176e-05
Glycerol 381 (M4)	0.000385219	0.000437127	0.000190235	0.000381259	-7.37116e-05	-0.000374413	-0.000180655	0.000281354	0.000207771	0.000448413	-0.000939929	-0.000886745	-5.34634e-06	0.000524736	-0.000617918	0.000605136	0.000570588	-0.00133786	-0.000162536	-0.000726094	0.000196192	0.00012354	5.66955e-05	7.73828e-05	5.33578e-06	-0.000139517	-2.1103e-05	5.78475e-05	-0.000422889	-0.000275922	-0.000512641	3.97507e-05	-0.000287448	-4.07247e-06	-4.99125e-05	-0.000616912	-0.000127675	-0.000380259	0.000106435	-0.000290478	5.43505e-05	0.000316377	0.000168047	-0.000115108	6.44087e-05	-0.00146669	-0.00209583	-0.00258147	0.000156387
Glycerol 382 (M5)	-0.000146113	1.66494e-05	-0.000127027	-0.000198314	-0.000222798	-6.59163e-05	-0.000266264	-0.000287224	4.13034e-05	-0.000236296	5.69217e-05	-0.000348631	-5.81007e-05	-0.000127998	-8.31253e-06	0.000457178	-0.000779983	-0.000733745	-6.52863e-05	-9.82089e-05	0.00031981	7.90876e-05	-0.000127065	7.83384e-05	2.3075e-06	7.66991e-05	6.61426e-05	0.000251704	5.53236e-05	0.000191437	8.379e-05	0.000208576	0.000245604	0.000156283	0.000217895	8.95366e-05	-0.000264129	-1.24462e-05	0.00019561	0.000171052	0.000214504	-1.6722e-05	-5.31349e-05	0.000188981	0.000189145	0.000296806	-0.000938728	0.000491286	-4.60704e-05
Atom Percent Enrichment	-0.00201328	-0.00257792	0.0375598	0.0381436	0.0542627	0.0543858	0.0801776	0.0801953	-0.00373365	-0.00220213	0.0262098	0.0278876	0.0490918	0.0455851	0.0593478	0.0588488	-0.00263319	-0.00153501	0.0211102	0.0224178	0.0336101	0.0343881	0.0616236	0.0617839	-0.00136827	-0.00131051	0.0306679	0.0292971	0.0540846	0.0533932	0.0681288	0.0679906	-0.0018975	-0.00184705	0.0265259	0.0271429	0.0347114	0.0353568	0.0557695	0.0572567	-0.00145762	-0.00222148	0.0416006	0.041735	0.0553885	0.0571741	0.238312	0.237261	-0.00402613
G3P 571 (M0)	0.5545	0.5586	0.5446	0.5466	0.5563	0.5541	0.5418	0.5302	0.5891	0.5638	0.5735	0.5812	0.5338	0.5405	0.5417	0.5234	0.6257	0.6023	0.5403	0.5476	0.5458	0.544	0.5519	0.5463	0.5519	0.5579	0.5722	0.5551	0.5438	0.5455	0.5493	0.5337	0.5647	0.5638	0.5515	0.5378	0.5413	0.5345	0.519	0.5312	0.5489	0.554	0.5412	0.5879	0.547	0.5592	0.5322	0.5393	0.5559
G3P 572 (M1)	0.2566	0.2595	0.2517	0.2531	0.2587	0.248	0.2453	0.2587	0.2587	0.2534	0.2503	0.2633	0.2425	0.2491	0.2386	0.2552	0.238	0.2711	0.2523	0.2553	0.2501	0.2652	0.2488	0.2541	0.2585	0.256	0.2374	0.2591	0.2541	0.2605	0.2455	0.2582	0.2489	0.2686	0.2544	0.2566	0.2472	0.2583	0.2418	0.2448	0.2555	0.2603	0.261	0.2225	0.2477	0.2472	0.2582	0.2498	0.255
G3P 573 (M2)	0.1355	0.1311	0.1427	0.1358	0.138	0.133	0.1392	0.1364	0.1282	0.1345	0.143	0.1293	0.129	0.1358	0.1378	0.1403	0.111	0.122	0.1365	0.1391	0.1367	0.1329	0.1264	0.1343	0.1386	0.1342	0.1368	0.1334	0.1386	0.1269	0.1367	0.13	0.1376	0.1218	0.1275	0.1446	0.1296	0.139	0.1362	0.1467	0.1309	0.1344	0.1348	0.1369	0.1455	0.1369	0.1359	0.1388	0.1346
G3P 574 (M3)	0.0404	0.0404	0.0486	0.0498	0.0434	0.052	0.0628	0.056	0.024	0.0416	0.0288	0.022	0.0513	0.0496	0.0496	0.053	0.0211	0	0.044	0.0417	0.0455	0.0468	0.0481	0.0462	0.0347	0.0416	0.0431	0.0439	0.048	0.0532	0.0527	0.0573	0.0383	0.0379	0.048	0.0474	0.0512	0.0453	0.0508	0.0516	0.0419	0.0395	0.0426	0.035	0.0394	0.047	0.0557	0.0545	0.0402
G3P 575 (M4)	0.0131	0.0104	0.0124	0.0146	0.0035	0.0129	0.0109	0.0187	0	0.0067	0.0044	0.0041	0.0382	0.0241	0.0288	0.0264	0.0042	0.0047	0.0269	0.0163	0.0207	0.011	0.0214	0.019	0.0163	0.0103	0.0105	0.0084	0.0152	0.0139	0.0157	0.0169	0.0104	0.0078	0.0162	0.0108	0.0307	0.0216	0.0418	0.0241	0.0228	0.0117	0.0203	0.0178	0.0205	0.0097	0.0157	0.0158	0.0119
G3P 576 (M5)	0	0	0	0	0	0	0	0	0	0	0	0	0.0052	0.0009	0.0035	0.0017	0	0	0	0	0.0011	0	0.0034	0	0	0	0	0	0.0002	0	0	0.0039	0	0	0.0026	0.0029	0	0.0013	0.0104	0.0015	0	0	0	0	0	0	0.0024	0.0017	0.0023
Corrected Data
G3P 571 (M0)	1.00893	1.01652	0.991634	0.995549	1.0126	1.00936	0.98778	0.966043	1.07059	1.02608	1.04254	1.05612	0.968606	0.983692	0.983982	0.952173	1.13722	1.09229	0.98352	0.996551	0.992925	0.990514	1.00251	0.994724	1.00378	1.01533	1.04158	1.01051	0.990113	0.99378	1.00075	0.969715	1.02754	1.02591	1.00213	0.976843	0.986049	0.972029	0.937941	0.966486	0.999038	1.00813	0.985094	1.06946	0.995153	1.01818	0.9678	0.981354	1.00991
G3P 572 (M1)	-0.00317202	-0.00139097	-0.00369166	-0.00284927	-0.000902208	-0.0183363	-0.0128854	0.0210149	-0.0283741	-0.0167344	-0.0304167	-0.0134864	-0.0111599	-0.00493144	-0.0247933	0.0203856	-0.0962525	-0.0171036	0.000997419	0.000274674	-0.00757376	0.0211269	-0.0150052	-0.000795563	0.00242707	-0.00710474	-0.0525953	0.000824824	0.00130241	0.011409	-0.0188137	0.0171268	-0.025586	0.0106277	-0.00460968	0.0108141	-0.00903128	0.0166513	-3.86187e-05	-0.00487022	-0.000455744	0.00390715	0.0159068	-0.0925355	-0.0128994	-0.0240486	0.0183984	-0.00266424	-0.00721467
G3P 573 (M2)	-0.00245487	-0.0129043	0.0149838	0.00142642	0.000178667	8.67979e-05	0.0141351	-0.000984861	-0.0193651	-0.00224444	0.0147601	-0.020619	-0.00126419	0.00506069	0.0170199	0.00923302	-0.0355682	-0.0411888	0.00372803	0.00545442	0.0055083	-0.0133814	-0.0121493	-0.00203774	0.00169245	-0.00450398	0.0142756	-0.00826168	0.00578472	-0.0203691	0.00902104	-0.0121819	0.00686276	-0.0371703	-0.0147022	0.0148	-0.00449663	0.00368973	0.0129859	0.0285485	-0.0093945	-0.00737909	-0.00640846	0.0254973	0.0230403	0.00735375	-0.00159698	0.00991193	-0.00284715
G3P 574 (M3)	-0.000587342	0.00303435	0.00764056	0.0152488	0.00276099	0.0224094	0.035649	0.0237449	-0.0205887	0.00342833	-0.0245893	-0.0260496	0.0226807	0.0145938	0.0138804	0.0149821	-0.00726641	-0.0574843	0.00393064	-0.00167716	0.00709739	0.0110985	0.0203748	0.0099725	-0.0134306	0.00291117	0.0062372	0.00709791	0.00954036	0.027573	0.0204731	0.0313329	-0.00439584	0.00573921	0.0189022	0.00302585	0.0224973	0.0032723	0.0147703	0.00901325	0.00519926	-0.00162887	0.00224721	-0.00552732	-0.0102362	0.0110802	0.0237884	0.0207101	1.40702e-05
G3P 575 (M4)	0.00275488	-0.00138905	-0.00573607	-0.00209194	-0.0164601	-0.00706224	-0.0195512	0.000965192	-0.00717776	-0.0097015	-0.00501335	0.00194222	0.0378382	0.0144489	0.021525	0.0161961	0.0016779	0.0209396	0.0239055	0.00701905	0.0115782	-0.00475194	0.0114938	0.00862931	0.012674	-0.00306034	-0.00589567	-0.00779198	0.000221077	-0.00449344	-0.00317413	-0.00273877	-0.00134789	-0.00247074	0.00286994	-0.00727877	0.0251974	0.0139554	0.0437876	0.0116735	0.0189968	0.00141776	0.0143013	0.0116437	0.0149314	-0.00929994	-0.00410494	-0.00408149	0.000707822
G3P 576 (M5)	-0.00546727	-0.00386634	-0.00483099	-0.0072834	0.00182653	-0.00645535	-0.00512726	-0.0107829	0.00491806	-0.000824214	0.00272171	0.00209052	-0.0167007	-0.0128637	-0.0116139	-0.0129697	0.000185695	0.00254311	-0.0160819	-0.00762185	-0.00953561	-0.00460654	-0.0072284	-0.0104924	-0.00714104	-0.0035725	-0.00360546	-0.00238266	-0.00696129	-0.00789924	-0.00825659	-0.00325395	-0.00306897	-0.00263946	-0.00458973	0.00179567	-0.0202157	-0.00959755	-0.00944578	-0.010851	-0.0133842	-0.00444582	-0.0111409	-0.00853447	-0.00998901	-0.00326455	-0.00428436	-0.00523054	-0.000570774
Atom Percent Enrichment	-0.00328126	-0.0060322	0.0163992	0.01525	0.00257936	0.0163552	0.0407773	0.0300933	-0.0429568	-0.00364608	-0.0248881	-0.0442911	0.018118	0.0163238	0.0169626	0.0279326	-0.0630627	-0.0906447	0.00674847	0.00205068	0.00824501	0.00921989	0.00727351	0.00834882	-0.0114933	-0.00245973	-0.00177753	0.00186506	0.013831	0.0177967	0.0202159	0.0289205	-0.00834932	-0.0154984	0.00756415	0.0164972	0.0164891	0.0112826	0.0234147	0.0264222	-0.00121565	-0.00524588	0.00327717	-0.0193743	0.000824229	0.00796652	0.0288566	0.0264299	-0.00428892
Lac 233 (M0)	0.7505	0.7505	0.5131	0.5123	0.4487	0.4459	0.4014	0.4008	0.7532	0.7502	0.4865	0.4865	0.4121	0.4105	0.3473	0.3474	0.7559	0.7566	0.4734	0.4729	0.3893	0.3888	0.3445	0.3426	0.7452	0.7451	0.5094	0.5084	0.4478	0.4485	0.4129	0.4105	0.7498	0.7506	0.4671	0.4675	0.3771	0.3761	0.3	0.2999	0.7491	0.7494	0.4858	0.4854	0.4511	0.4523	0.3076	0.3054	0.7577
Lac 234 (M1)	0.1645	0.1645	0.1444	0.1448	0.147	0.1475	0.1464	0.1467	0.1629	0.1649	0.134	0.1322	0.1424	0.1423	0.1286	0.1289	0.1627	0.1627	0.1318	0.1314	0.1299	0.1291	0.122	0.1216	0.165	0.165	0.1432	0.1441	0.1524	0.1522	0.148	0.148	0.1662	0.1661	0.1397	0.1398	0.1298	0.1303	0.1162	0.1167	0.1663	0.1662	0.1345	0.1345	0.1473	0.1466	0.1216	0.1223	0.1613
Lac 235 (M2)	0.0721	0.0719	0.2679	0.2683	0.3148	0.3162	0.3506	0.3511	0.0711	0.0721	0.297	0.299	0.3464	0.3475	0.4067	0.4069	0.0694	0.0686	0.3087	0.3092	0.3735	0.3749	0.4149	0.4165	0.0759	0.076	0.2723	0.2721	0.3111	0.311	0.3413	0.3426	0.0715	0.071	0.3068	0.3063	0.383	0.3833	0.4518	0.4515	0.0719	0.0716	0.2967	0.297	0.3131	0.3131	0.4409	0.4419	0.0682
Lac 236 (M3)	0.0103	0.0105	0.0512	0.0514	0.0615	0.0621	0.0696	0.0693	0.0103	0.0103	0.0567	0.0567	0.0679	0.0682	0.0796	0.0792	0.0099	0.01	0.059	0.0592	0.0729	0.0728	0.0804	0.0809	0.0111	0.0111	0.0518	0.052	0.0611	0.0608	0.067	0.0678	0.0101	0.0102	0.059	0.0591	0.0748	0.0747	0.0891	0.0895	0.0103	0.0104	0.0567	0.0568	0.0605	0.0604	0.0878	0.0882	0.0097
Lac 237 (M4)	0.0022	0.0022	0.0206	0.0206	0.0249	0.025	0.0282	0.0283	0.0021	0.0022	0.0228	0.0226	0.0276	0.0278	0.0334	0.0332	0.0018	0.0018	0.0239	0.024	0.0304	0.0304	0.0338	0.0339	0.0024	0.0024	0.0206	0.0207	0.0243	0.0244	0.0272	0.0275	0.002	0.002	0.0241	0.0242	0.0312	0.0313	0.038	0.0375	0.002	0.002	0.0231	0.0231	0.0246	0.0244	0.0373	0.0373	0.0024
Lac 238 (M5)	0.0004	0.0004	0.0028	0.0027	0.0032	0.0033	0.0037	0.0038	0.0003	0.0004	0.003	0.003	0.0036	0.0037	0.0043	0.0044	0.0003	0.0002	0.0033	0.0032	0.004	0.004	0.0045	0.0046	0.0004	0.0004	0.0028	0.0028	0.0032	0.0032	0.0035	0.0037	0.0004	0.0002	0.0033	0.0032	0.0042	0.0042	0.005	0.0049	0.0004	0.0004	0.0031	0.0031	0.0033	0.0033	0.0048	0.0048	0.0006
Corrected Data
Lac 233 (M0)	0.992403	0.992406	0.678151	0.677049	0.592941	0.589288	0.530491	0.529624	0.996107	0.991906	0.64299	0.642997	0.54459	0.542459	0.458931	0.459004	0.999581	1.00064	0.625565	0.625048	0.514407	0.513746	0.455119	0.452599	0.985404	0.985272	0.673205	0.671883	0.591876	0.592676	0.545712	0.542402	0.991479	0.992498	0.61729	0.617774	0.498213	0.496988	0.396284	0.396215	0.990558	0.990956	0.642101	0.641574	0.596209	0.59768	0.406384	0.403521	1.00194
Lac 234 (M1)	0.00340522	0.00340524	0.0440781	0.0448237	0.0656294	0.0670778	0.0781909	0.0787413	0.000550624	0.00401268	0.037983	0.0356302	0.0699387	0.070257	0.0701682	0.0705231	-0.000472914	-0.000670524	0.0387944	0.0384214	0.0600219	0.0591172	0.0623153	0.0623269	0.00555476	0.00558298	0.0435492	0.0450077	0.0729571	0.072483	0.0770426	0.0776997	0.00582639	0.00546964	0.0509014	0.0509156	0.0633218	0.0642695	0.0672728	0.067965	0.00615473	0.00593929	0.0388363	0.0389492	0.0653553	0.0640894	0.0721972	0.0737402	-0.00281208
Lac 235 (M2)	0.004052	0.00379324	0.277022	0.277464	0.340848	0.342723	0.390213	0.390762	0.00301824	0.00396386	0.319024	0.322091	0.38516	0.386695	0.4707	0.470812	0.000707047	-0.000370718	0.335475	0.336335	0.424855	0.426907	0.483101	0.48538	0.0091587	0.00929417	0.283232	0.282795	0.334758	0.334569	0.377079	0.37881	0.00286782	0.00219863	0.331336	0.330615	0.437842	0.438243	0.534979	0.534549	0.00340146	0.00302155	0.318565	0.318978	0.338479	0.338526	0.519076	0.520373	-0.000584174
Lac 236 (M3)	-0.000388487	-7.95491e-05	4.07353e-06	0.000121136	0.000127534	0.000465263	0.000730597	0.000186307	1.77166e-05	-0.00041987	-4.20254e-05	-0.000428771	5.14332e-05	0.000138349	-0.000337155	-0.00092149	-7.27388e-06	0.000336676	-0.000119651	2.92162e-05	6.90033e-05	-0.000370125	-0.000992903	-0.000759582	-0.000443236	-0.000470296	-0.000319761	-8.80942e-05	0.000176101	-0.000160201	-0.000174782	0.000486306	-0.000618952	-0.00034194	-0.000271093	-1.49048e-05	-9.03135e-05	-0.000346439	0.00049623	0.00105477	-0.00048073	-0.000263789	-1.25087e-05	3.3698e-05	-0.000711146	-0.000772003	0.0013537	0.0015323	0.000159766
Lac 237 (M4)	0.000291788	0.00025437	0.000533005	0.000463813	0.000458676	0.000353248	0.000317602	0.00049505	0.000199411	0.000299126	-0.000108264	-0.000529899	0.000175717	0.00028418	0.000511715	0.000346708	2.0842e-05	4.80217e-05	-7.48538e-05	-3.63523e-05	0.000528408	0.000447594	0.000170569	6.13124e-05	0.000107997	0.000101442	7.18656e-05	0.000179758	0.000123911	0.000332073	0.000321108	0.000421244	0.000153774	0.000160027	0.000449519	0.000588268	0.000457356	0.000600771	0.000874724	0.00015706	7.8825e-05	7.14282e-05	0.000307443	0.000262536	0.000440054	0.000194779	0.00111028	0.000956313	0.000899391
Lac 238 (M5)	0.000236963	0.000220262	0.000211463	7.88873e-05	-4.37851e-06	9.3233e-05	5.63488e-05	0.000190751	0.000107093	0.000237987	0.000153187	0.000239606	8.39666e-05	0.000167305	2.64697e-05	0.000235735	0.000170941	1.8602e-05	0.000360178	0.000202814	0.000118326	0.000151452	0.000286905	0.000392198	0.000217572	0.000219657	0.000262002	0.000222946	0.000109135	0.000100065	2.07351e-05	0.000181439	0.000291843	1.57666e-05	0.000293593	0.000122706	0.000256029	0.000245288	9.31727e-05	5.88313e-05	0.000287942	0.000275132	0.000203036	0.000203027	0.000228214	0.000282116	-0.000120924	-0.000123018	0.000393144
Atom Percent Enrichment	0.00575461	0.00549586	0.299061	0.299876	0.373662	0.376262	0.429309	0.430133	0.00329356	0.0059702	0.338016	0.339907	0.42013	0.421823	0.505784	0.506073	0.00047059	-0.00070598	0.354872	0.355546	0.454866	0.456466	0.514259	0.516543	0.0119361	0.0120857	0.305006	0.305299	0.371237	0.37081	0.4156	0.417659	0.00578101	0.00493345	0.356787	0.356072	0.469503	0.470377	0.568615	0.568532	0.00647883	0.0059912	0.337983	0.338452	0.371156	0.370571	0.555174	0.557243	-0.00199021
Lac 261 (M0)	0.7352	0.7357	0.485	0.4852	0.4184	0.4148	0.3686	0.3686	0.7408	0.7335	0.4628	0.4629	0.3791	0.3773	0.3194	0.3185	0.7438	0.7438	0.4492	0.4483	0.3614	0.3609	0.3174	0.3155	0.7279	0.7284	0.4809	0.4806	0.4127	0.4126	0.3776	0.3747	0.7329	0.7331	0.4386	0.4385	0.3472	0.3466	0.2716	0.2718	0.7329	0.7329	0.4603	0.4605	0.4204	0.4217	0.2744	0.2723	0.7457
Lac 262 (M1)	0.1739	0.1739	0.146	0.1457	0.1454	0.1449	0.1416	0.1417	0.1706	0.1753	0.1341	0.1339	0.1401	0.1396	0.1219	0.1214	0.1705	0.1708	0.1321	0.132	0.1264	0.1264	0.1158	0.1156	0.1751	0.1749	0.1464	0.1465	0.1536	0.1539	0.1476	0.1482	0.1767	0.1769	0.1397	0.1399	0.1267	0.1266	0.1094	0.1091	0.1761	0.1766	0.1348	0.1348	0.1453	0.1455	0.1175	0.1172	0.1695
Lac 263 (M2)	0.0742	0.0738	0.0903	0.0903	0.0997	0.1001	0.1037	0.1038	0.0723	0.0745	0.0854	0.0841	0.103	0.1032	0.0933	0.0937	0.0721	0.072	0.0819	0.0815	0.0903	0.0903	0.0852	0.0853	0.0755	0.075	0.0925	0.0925	0.1074	0.1074	0.105	0.1055	0.0756	0.0753	0.0929	0.0929	0.0941	0.0945	0.0893	0.0893	0.0755	0.0752	0.084	0.0841	0.1004	0.1005	0.1041	0.1048	0.0714
Lac 264 (M3)	0.0137	0.0136	0.2141	0.2143	0.2589	0.261	0.2962	0.2959	0.0133	0.0136	0.2454	0.2467	0.2904	0.2919	0.358	0.3589	0.0112	0.0111	0.2601	0.2609	0.3247	0.325	0.3711	0.3722	0.0174	0.0175	0.216	0.2161	0.251	0.2505	0.2847	0.2858	0.0122	0.0122	0.2529	0.2527	0.3319	0.3322	0.4063	0.4071	0.0127	0.0126	0.247	0.2469	0.257	0.2559	0.385	0.3859	0.0111
Lac 265 (M4)	0.0025	0.0025	0.0437	0.0435	0.0525	0.0535	0.0607	0.0608	0.0025	0.0025	0.0486	0.0486	0.059	0.0593	0.0722	0.0722	0.0021	0.002	0.0515	0.052	0.0653	0.0655	0.0738	0.0745	0.0033	0.0033	0.0435	0.0436	0.0511	0.0513	0.0575	0.0581	0.0022	0.0022	0.0512	0.0512	0.0673	0.0673	0.0826	0.0821	0.0024	0.0024	0.0496	0.0495	0.052	0.0518	0.0799	0.0804	0.002
Lac 266 (M5)	0.0004	0.0004	0.0185	0.0186	0.0222	0.0227	0.0259	0.0257	0.0004	0.0004	0.021	0.021	0.0251	0.0253	0.031	0.0314	0.0002	0.0002	0.0222	0.0224	0.0283	0.0284	0.0324	0.0327	0.0008	0.0008	0.0184	0.0184	0.0214	0.0214	0.0243	0.0246	0.0003	0.0003	0.0219	0.0219	0.0289	0.0291	0.036	0.036	0.0003	0.0003	0.0214	0.0213	0.0219	0.0217	0.0347	0.0348	0.0002
Lac 267 (M6)	0	0	0.0024	0.0025	0.0028	0.0029	0.0033	0.0034	0.0001	0.0001	0.0028	0.0027	0.0033	0.0033	0.0041	0.004	0	0	0.0029	0.0029	0.0037	0.0036	0.0042	0.0042	0.0001	0.0001	0.0023	0.0024	0.0028	0.0028	0.0032	0.0032	0	0	0.0028	0.0029	0.0038	0.0037	0.0047	0.0047	0	0	0.0028	0.0028	0.0029	0.0028	0.0045	0.0046	0.0001
Corrected Data
Lac 261 (M0)	0.98538	0.98605	0.649643	0.649821	0.56045	0.555611	0.493636	0.493676	0.992759	0.983072	0.619785	0.620063	0.507696	0.505335	0.42772	0.426435	0.996907	0.996905	0.601689	0.600425	0.483901	0.483246	0.425025	0.42244	0.975372	0.97614	0.64417	0.643686	0.552754	0.552678	0.505751	0.501766	0.982293	0.982463	0.587442	0.587291	0.464975	0.464134	0.363659	0.36385	0.982297	0.982199	0.616564	0.616834	0.563112	0.564873	0.367344	0.364561	0.999323
Lac 262 (M1)	0.00926053	0.00911004	0.0475519	0.0470878	0.0667931	0.0672115	0.0767225	0.0768612	0.00319942	0.011628	0.0384552	0.038169	0.0715771	0.0714632	0.0654186	0.0650147	0.00216425	0.00256198	0.0399038	0.0400381	0.0587408	0.0588929	0.0579374	0.0582382	0.0130458	0.0126315	0.0493167	0.0495331	0.0793643	0.0798001	0.0819741	0.0836246	0.013665	0.0138686	0.0531579	0.0534514	0.06342	0.0634629	0.063227	0.0627564	0.0128696	0.0135311	0.0401427	0.0400826	0.066057	0.0659331	0.0731006	0.0733403	0.000266525
Lac 263 (M2)	0.00308121	0.00252606	0.047369	0.0474352	0.0639297	0.0648136	0.0732756	0.0733843	0.00118219	0.00318171	0.0456646	0.0440218	0.0721414	0.0726622	0.0682271	0.0689349	0.000764997	0.000548829	0.0424835	0.0420385	0.0604487	0.0604811	0.0594606	0.0597585	0.00489116	0.00426212	0.0503911	0.0503747	0.0720399	0.0719685	0.0727393	0.0733871	0.0042643	0.00380158	0.0553912	0.055339	0.066222	0.0668058	0.0694353	0.0694934	0.00430321	0.0037677	0.0437935	0.0439125	0.0647514	0.0647486	0.0863462	0.0874829	1.42299e-05
Lac 264 (M3)	0.00246946	0.00245673	0.254501	0.254748	0.308727	0.311289	0.355138	0.354745	0.00278358	0.00213504	0.296614	0.298729	0.348121	0.350041	0.438199	0.439189	0.000182485	6.03121e-05	0.316501	0.317601	0.396382	0.396772	0.45766	0.458987	0.00669172	0.0069784	0.256275	0.256359	0.295763	0.295124	0.339736	0.340862	-7.54335e-05	-4.07949e-06	0.30351	0.303227	0.404461	0.404705	0.501584	0.502539	0.000637937	0.000556233	0.299025	0.298873	0.306117	0.304689	0.469508	0.470499	0.0003426
Lac 265 (M4)	-0.000157208	-0.000104454	0.000667452	0.000352026	2.84999e-05	0.000752378	0.000826372	0.00102701	1.35229e-05	-0.000126733	-0.000821859	-0.00106697	0.000119479	0.000103729	0.000366924	0.000101831	4.08714e-05	-5.08996e-05	-0.000598822	-0.000129259	0.000179682	0.000362397	-0.000447541	0.000168373	-0.000127851	-0.000122936	-0.000216259	-0.000110325	-0.000152662	0.000238449	-0.000372822	0.000101365	-0.000208891	-0.000184471	0.000228898	0.000283127	0.000685512	0.00058017	0.00160465	0.000749417	-8.10067e-05	-2.5683e-05	0.000173892	6.31757e-05	-0.000185901	-0.000168231	0.00265461	0.00301954	-3.38062e-05
Lac 266 (M5)	1.50276e-05	1.29652e-05	0.000349536	0.000515386	0.000219685	0.000487811	0.000603969	0.000341724	-9.78411e-06	3.24101e-05	0.000179842	6.65713e-05	0.000351242	0.000440502	2.05623e-05	0.000487347	-3.65142e-05	-6.12388e-06	-3.09005e-05	4.20132e-05	0.000369902	0.000429809	0.00038801	0.000531295	0.000123421	0.000105655	0.000194225	0.000162909	0.000238813	0.000222375	0.000127417	0.000306724	9.71225e-05	9.11684e-05	0.000384454	0.000398224	0.000259857	0.00050776	0.000623518	0.000695319	1.02943e-05	1.18014e-05	0.000316031	0.00022002	9.46601e-05	-4.02405e-05	0.00134611	0.00130621	-2.30002e-05
Lac 267 (M6)	-4.88764e-05	-5.17057e-05	-8.24037e-05	3.97408e-05	-0.000147179	-0.000165666	-0.000202485	-3.5175e-05	7.25344e-05	7.78736e-05	0.000122778	1.73128e-05	-6.20776e-06	-4.49596e-05	4.78764e-05	-0.00016273	-2.3344e-05	-1.92658e-05	5.27272e-05	-1.51975e-05	-2.24595e-05	-0.000184394	-2.34559e-05	-0.000122588	3.65484e-06	4.92821e-06	-0.000130963	-6.02009e-06	-7.60372e-06	-3.14013e-05	4.47214e-05	-4.78823e-05	-3.46441e-05	-3.54529e-05	-0.000114834	1.05095e-05	-2.27168e-05	-0.000195665	-0.000133187	-8.33626e-05	-3.7273e-05	-4.04487e-05	-1.52091e-05	1.47684e-05	5.39642e-05	-3.44948e-05	-0.000299658	-0.000208393	0.000110682
Atom Percent Enrichment	0.00761044	0.00717745	0.301931	0.302068	0.373611	0.376902	0.429563	0.429288	0.00463818	0.00813218	0.339875	0.3408	0.420075	0.422303	0.50549	0.506817	0.0014139	0.00128019	0.358125	0.358973	0.456262	0.456724	0.516613	0.518238	0.0143011	0.0140303	0.306308	0.306453	0.370244	0.369703	0.415554	0.417661	0.00732243	0.00715316	0.358157	0.357937	0.469749	0.470396	0.56895	0.569786	0.00779661	0.00757841	0.341601	0.341509	0.371303	0.369832	0.551439	0.553267	0.000440929
Mal 391 (M0)	0.6841	0.6971	0.5932	0.6056	0.6238	0.5962	0.6171	0.5906	0.7935	0.6625	1	1	0.6254	0.5322	0.6468	0.9124	0.6803	0.6992	0.5859	0.611	0.5321	0.5097	0.5797	0.5542	0.6371	0.6375	0.5756	0.5533	0.4989	0.5253	0.4998	0.4685	0.7064	0.6657	0.622	0.5958	0.6581	0.5976	0.7732	1	0.6377	0.6411	0.5613	0.5865	0.5844	0.5996	0.8672	0.6039	0.6459
Mal 392 (M1)	0.2293	0.2263	0.2546	0.2205	0.3026	0.2688	0.2629	0.2159	0.2065	0.2484	0	0	0.2464	0.2822	0.3532	0.0876	0.2376	0.2206	0.2473	0.2395	0.2488	0.27	0.259	0.2756	0.2233	0.2204	0.2234	0.2462	0.2594	0.251	0.2489	0.2632	0.1853	0.1839	0.2924	0.2743	0.196	0.2444	0.2268	0	0.2184	0.2201	0.2353	0.2348	0.2375	0.2347	0.1328	0.2566	0.2185
Mal 393 (M2)	0.0709	0.0555	0.1361	0.1556	0.0736	0.1142	0.12	0.1778	0	0.0891	0	0	0.1136	0.1388	0	0	0.0821	0.0801	0.1346	0.1085	0.1519	0.1501	0.1165	0.1098	0.1031	0.1094	0.1318	0.1324	0.1568	0.1415	0.1666	0.1653	0.0607	0.0662	0.0724	0.1194	0.136	0.158	0	0	0.1081	0.1055	0.1359	0.1321	0.1344	0.1369	0	0.1212	0.1043
Mal 394 (M3)	0.0157	0.021	0.0161	0.0184	0	0.0208	0	0.0157	0	0	0	0	0.0146	0.0468	0	0	0	0	0.0322	0.041	0.0654	0.0617	0.0448	0.0604	0.0316	0.0297	0.0622	0.0614	0.0674	0.0655	0.0847	0.0897	0.0477	0.0842	0.0132	0	0.0099	0	0	0	0.0344	0.029	0.0568	0.0466	0.0437	0.0288	0	0.0182	0.0244
Mal 395 (M4)	0	0	0	0	0	0	0	0	0	0	0	0	0	0	0	0	0	0	0	0	0.0017	0.0086	0	0	0.0049	0.003	0.0071	0.0067	0.0175	0.0166	0	0.0132	0	0	0	0.0104	0	0	0	0	0.0015	0.0041	0.0106	0	0	0	0	0	0.0058
Mal 396 (M5)	0	0	0	0	0	0	0	0	0	0	0	0	0	0	0	0	0	0	0	0	0	0	0	0	0	0	0	0	0	0	0	0	0	0	0	0	0	0	0	0	0	0	0	0	0	0	0	0	0.001
Corrected Data
Mal 391 (M0)	1.06627	1.08695	0.924395	0.943785	0.97134	0.929278	0.960927	0.920352	1.23616	1.03174	1.55886	1.55886	0.974579	0.830451	1.00716	1.42192	1.05951	1.08912	0.91373	0.953345	0.831112	0.795579	0.904597	0.865404	0.993519	0.994117	0.898678	0.863865	0.77877	0.820065	0.78131	0.732244	1.10274	1.04107	0.969168	0.927472	1.02542	0.930537	1.20446	1.55886	0.994611	0.999868	0.876154	0.915322	0.911909	0.934979	1.35128	0.941281	1.00647
Mal 392 (M1)	-0.0114715	-0.023042	0.0760198	0.0168423	0.133585	0.0963298	0.0760083	0.0177522	-0.104942	0.0294767	-0.533626	-0.533626	0.0462032	0.151307	0.199265	-0.351705	0.0033502	-0.032921	0.0687146	0.0433034	0.0999045	0.144537	0.0901271	0.129462	0.00435697	-0.00033001	0.0373857	0.0845169	0.13395	0.106884	0.117427	0.15626	-0.09135	-0.0718919	0.118911	0.104889	-0.0489252	0.0579052	-0.0628297	-0.533626	-0.00352248	-0.00271486	0.0633926	0.0491462	0.0544282	0.041958	-0.257876	0.0734114	-0.0077391
Mal 393 (M2)	-0.0588416	-0.0817728	0.0342713	0.0805334	-0.0877154	-0.00659754	0.00373947	0.117821	-0.163196	-0.0392424	-0.0727708	-0.0727708	0.00181127	0.0287607	-0.227365	-0.111145	-0.0456902	-0.0414367	0.0362737	-0.00139352	0.0659247	0.0539116	0.00312332	-0.013753	-0.00324844	0.0078183	0.0450238	0.0358929	0.0703612	0.0493733	0.0907706	0.0837203	-0.053615	-0.041606	-0.0842595	-0.00144702	0.0593359	0.0725006	-0.172079	-0.0727708	0.00684409	0.00175907	0.0462267	0.0388353	0.0411127	0.045224	-0.130937	0.00975372	0.000396259
Mal 394 (M3)	0.00528478	0.0217002	-0.0324779	-0.0352871	-0.0283754	-0.0156347	-0.048307	-0.0506028	0.0234753	-0.0298321	0.0497754	0.0497754	-0.0215008	0.00734271	0.00481196	0.0386144	-0.0246911	-0.0214607	-0.007264	0.0206566	0.0316381	0.0241464	0.0194083	0.0437224	0.0116552	0.00594919	0.0407768	0.0363923	0.0297625	0.0363577	0.0520359	0.0575543	0.063167	0.113908	-0.00719905	-0.0499401	-0.0340068	-0.0664098	0.0208917	0.0497754	0.0138468	0.00700447	0.0289645	0.016707	0.0108843	-0.011861	0.0328579	-0.0216521	0.00101002
Mal 395 (M4)	-0.00147361	-0.00283885	-0.00590555	-0.0102652	0.00924614	-0.0056163	0.00345954	-0.0110659	0.0107955	0.00534903	0.000880745	0.000880745	-0.00370583	-0.0193643	0.0178313	0.00508828	0.00541652	0.00476846	-0.0137625	-0.0161277	-0.0283471	-0.0149841	-0.0176633	-0.0237143	-0.00460053	-0.00723362	-0.0181982	-0.0173763	-0.00532084	-0.00490065	-0.0413359	-0.022947	-0.017912	-0.0358135	0.00261498	0.0197162	-0.00577627	-0.000607079	0.0117695	0.000880745	-0.011712	-0.00493128	-0.0101203	-0.0209908	-0.019676	-0.0129486	0.00725839	-0.00555758	-0.000164264
Mal 396 (M5)	0.000235536	-0.00100054	0.00369713	0.00439199	0.00191916	0.00224032	0.00417294	0.00574393	-0.00229244	0.00250875	-0.00312008	-0.00312008	0.00261325	0.00150281	-0.00170511	-0.00276885	0.0021017	0.00193037	0.0023083	0.000216131	-0.000232012	-0.00318989	0.000407732	-0.00112087	-0.0016817	-0.000321274	-0.00366596	-0.00329103	-0.00752268	-0.00777938	-0.000207741	-0.00683171	-0.00302766	-0.00567115	0.000765095	-0.000689988	0.00395136	0.00607451	-0.00221113	-0.00312008	-6.76598e-05	-0.000985868	-0.00461753	0.000980033	0.00134201	0.00264854	-0.0025877	0.00276342	2.5976e-05
Atom Percent Enrichment	-0.0377668	-0.0404956	0.0157096	0.024016	-0.042324	0.0120769	-0.0204779	0.0338619	-0.120303	-0.0461681	-0.176614	-0.176614	-0.00489222	0.0769522	-0.0803429	-0.152717	-0.0540346	-0.0600589	0.0398233	0.0341621	0.108889	0.108267	0.0515328	0.0777075	0.0109419	0.0110514	0.0832545	0.0884932	0.12132	0.104901	0.151692	0.165454	-0.0030263	0.0622064	-0.0237351	-0.0159417	-0.010758	0.00122566	-0.114771	-0.176614	0.0172354	0.00727223	0.0809132	0.0589793	0.0564355	0.0322743	-0.140392	0.00932088	-0.00130551
Mal 419 (M0)	0.6313	0.6331	0.5408	0.5446	0.5103	0.5088	0.4624	0.4542	0.6412	0.6271	0.57	0.5559	0.4579	0.472	0.4407	0.4535	0.6466	0.6379	0.541	0.5427	0.4917	0.4903	0.483	0.4832	0.6329	0.6343	0.5352	0.5323	0.4732	0.4745	0.4355	0.4363	0.6265	0.6287	0.5043	0.5059	0.5084	0.5029	0.4273	0.3299	0.6343	0.6348	0.5269	0.5298	0.5024	0.5079	0.498	0.4956	0.6338
Mal 420 (M1)	0.2266	0.2264	0.2295	0.23	0.2316	0.232	0.2415	0.2416	0.2234	0.2335	0.2349	0.2541	0.2468	0.2523	0.2539	0.2573	0.2229	0.2241	0.233	0.2365	0.242	0.2406	0.246	0.2556	0.2243	0.2239	0.2302	0.234	0.2415	0.2415	0.2484	0.2515	0.2262	0.2305	0.2441	0.2479	0.2498	0.249	0.2454	0.1878	0.2245	0.226	0.241	0.2412	0.2431	0.2418	0.2556	0.2454	0.2262
Mal 421 (M2)	0.1093	0.1071	0.1385	0.1363	0.1455	0.1501	0.1695	0.1632	0.11	0.1089	0.1118	0.1593	0.1692	0.1592	0.1753	0.167	0.1034	0.1054	0.1387	0.1346	0.1528	0.152	0.1585	0.1526	0.1083	0.1079	0.1405	0.1352	0.1575	0.1567	0.1683	0.1693	0.1139	0.1101	0.141	0.1439	0.1345	0.1394	0.1614	0.1262	0.1063	0.1065	0.1367	0.1372	0.1473	0.1452	0.1505	0.1569	0.1072
Mal 422 (M3)	0.0276	0.0277	0.062	0.0569	0.0794	0.073	0.0812	0.0903	0.0237	0.0254	0.0652	0.0307	0.0814	0.0752	0.0887	0.0849	0.0243	0.029	0.0592	0.0592	0.0744	0.0761	0.0694	0.0683	0.0262	0.0259	0.0637	0.0657	0.0824	0.0821	0.0913	0.09	0.0263	0.0279	0.0739	0.0708	0.0637	0.0668	0.1102	0.2575	0.0263	0.0256	0.0642	0.0613	0.0691	0.0713	0.0723	0.07	0.0253
Mal 423 (M4)	0.0046	0.0051	0.0209	0.0233	0.0278	0.0279	0.0377	0.0365	0.0017	0.005	0.0181	0	0.0352	0.0343	0.0415	0.0373	0.0027	0.0036	0.0216	0.0212	0.0291	0.0313	0.0321	0.032	0.007	0.0067	0.0226	0.0241	0.0315	0.0333	0.0399	0.0377	0.0071	0.0028	0.028	0.0261	0.0306	0.0272	0.0557	0.0786	0.0074	0.0065	0.024	0.0245	0.0277	0.0264	0.02	0.0268	0.0062
Mal 424 (M5)	0	0	0.0066	0.0062	0.0053	0.005	0.0076	0.0111	0	0	0	0	0.0096	0.007	0	0	0	0	0.0055	0.0055	0.0081	0.0081	0.0086	0.0078	0.0012	0.0011	0.0066	0.007	0.0109	0.0092	0.0123	0.0119	0	0	0.0037	0.0045	0.009	0.0078	0	0.0201	0.001	0.0007	0.0069	0.0058	0.0085	0.0074	0.0036	0.0042	0.001
Mal 425 (M6)	0.0005	0.0006	0.0018	0.0026	0	0.0032	0	0.0031	0	0	0	0	0	0	0	0	0	0	0.001	0.0004	0.0018	0.0015	0.0023	0.0006	0.0002	0.0001	0.0013	0.0017	0.0029	0.0027	0.0042	0.0033	0	0	0.0049	0.001	0.0041	0.0069	0	0	0.0001	0	0.0004	0.0003	0.0019	0	0	0.0011	0.0002
Corrected Data
Mal 419 (M0)	0.996815	0.999537	0.853499	0.859443	0.80653	0.802774	0.731054	0.716743	1.01247	0.990463	0.900675	0.877569	0.723654	0.746085	0.696914	0.717107	1.02117	1.00735	0.854319	0.857176	0.776375	0.774364	0.762533	0.763397	0.99937	1.00182	0.844939	0.840331	0.746728	0.748896	0.686985	0.688433	0.989498	0.992777	0.795128	0.798985	0.801732	0.791894	0.676252	0.522126	1.00187	1.00248	0.832276	0.836958	0.793106	0.802554	0.78677	0.782762	1.00097
Mal 420 (M1)	0.00154373	0.00022658	0.0565617	0.0552188	0.0769679	0.0782963	0.119246	0.123753	-0.00898065	0.0146694	0.0487599	0.0865649	0.129998	0.130745	0.150803	0.148956	-0.012778	-0.0060458	0.0619507	0.0664823	0.103519	0.10214	0.114606	0.12958	-0.00294185	-0.00434917	0.0607988	0.0683492	0.112998	0.11229	0.144747	0.149178	0.00359923	0.00908708	0.0996224	0.104832	0.106246	0.107905	0.145111	0.109435	-0.00341192	-0.00134726	0.0823406	0.0810435	0.0992436	0.0942341	0.121313	0.106683	-0.000476604
Mal 421 (M2)	0.0028722	-0.000547192	0.0528178	0.0488809	0.0647567	0.071639	0.0999954	0.0906071	0.00496553	-0.00114197	0.00663815	0.0707278	0.0969717	0.0775775	0.103886	0.0883064	-0.00534749	-0.00228289	0.0512702	0.0429497	0.0717226	0.0713535	0.0789933	0.0647738	0.00244504	0.00194244	0.0559465	0.0459294	0.0805147	0.0791998	0.0961331	0.0959883	0.0105361	0.00220499	0.0514016	0.0538214	0.0380437	0.0463531	0.0879535	0.0712623	-0.00085153	-0.00138074	0.044908	0.0453738	0.0618659	0.0589846	0.060478	0.0759832	-0.000335347
Mal 422 (M3)	0.00196311	0.0033529	0.0345949	0.0280908	0.0559144	0.0435788	0.0431047	0.0597154	-0.00359589	-0.00193755	0.0543498	-0.0249602	0.0429098	0.0388863	0.0495379	0.0483927	0.00102587	0.00663801	0.0299781	0.0319104	0.042714	0.0457671	0.0313873	0.0320367	0.000594365	0.000444627	0.0358327	0.0411648	0.0515707	0.0515984	0.0571159	0.0544404	-0.00260373	0.00157975	0.0484304	0.0420807	0.0359811	0.037921	0.0895982	0.332612	0.00183131	0.000570829	0.0373118	0.0327621	0.0379025	0.0427675	0.0400047	0.0338433	-0.000314195
Mal 423 (M4)	-0.00355473	-0.00267965	0.00195814	0.0082898	0.00338392	0.00631641	0.0160316	0.0102344	-0.00623988	-0.00148948	-0.0014049	-0.0146917	0.0124364	0.015216	0.018257	0.0146136	-0.00451432	-0.00556397	0.00455386	0.00445937	0.00773156	0.0102184	0.0144584	0.0158223	0.000724761	0.000431069	0.00356617	0.00547103	0.00701723	0.0099505	0.0148019	0.0121973	0.000469423	-0.00629073	0.00736707	0.00598841	0.0171073	0.0100024	0.0298961	-0.00799205	0.00145283	0.00049581	0.00629216	0.00844414	0.00871817	0.0057852	-0.00411661	0.00625998	0.000142746
Mal 424 (M5)	-0.000887975	-0.00124957	0.000160838	-0.0012646	-0.00612631	-0.00583157	-0.00613438	-0.00133616	0.000821953	-0.00088811	-0.0101959	0.00379923	-0.0019315	-0.00544683	-0.0197191	-0.01785	-5.19131e-05	-0.000753228	-0.00158049	-0.00159811	-0.00163812	-0.00286502	-0.00155741	-0.00291259	-0.000149088	-0.000157225	-0.000672261	-0.00120234	0.00106308	-0.00237715	-0.00089744	-0.000297298	-0.00171689	-7.81379e-06	-0.0083421	-0.00583495	-0.00102926	-0.00123354	-0.0289972	-0.0236216	-0.000754293	-0.000710845	-0.00107809	-0.00271398	-0.000222677	-0.00158366	-0.00406941	-0.00587098	-5.07473e-05
Mal 425 (M6)	0.00124854	0.0013603	0.000407422	0.00134144	-0.0014266	0.00322665	-0.00329721	0.000283641	0.000559794	0.000324782	0.00117799	0.000991006	-0.00403834	-0.00306347	0.000321349	0.000475312	0.000499786	0.000654026	-0.000491561	-0.00137984	-0.000423186	-0.00097756	-0.000420967	-0.00269677	-4.3552e-05	-0.000135424	-0.000410538	-4.27485e-05	0.00010886	0.000442169	0.00111419	5.94956e-05	0.000217957	0.000650105	0.00639326	0.000126591	0.00191963	0.00715818	0.000186926	-0.00382188	-0.000131756	-0.000102874	-0.00204997	-0.00186733	-0.000613511	-0.00274158	-0.000379021	0.000339441	6.79181e-05
Atom Percent Enrichment	-0.000260365	-0.000381925	0.0684536	0.0676031	0.09694	0.0943941	0.128169	0.131263	-0.00869919	0.000153731	0.0548665	0.0235933	0.125604	0.115856	0.145054	0.1323	-0.00961317	-0.00323836	0.0681602	0.0664876	0.101508	0.105755	0.106147	0.104632	0.00165759	0.000648469	0.0736137	0.0763966	0.114202	0.116322	0.141892	0.138316	0.00468448	-0.00173165	0.0942962	0.0906677	0.0896764	0.0885959	0.177349	0.304457	0.00154757	-0.000103254	0.0773151	0.0759635	0.0928889	0.0909116	0.0864541	0.0963049	-0.000379725
Pyr 174 (M0)	0.8501	0.8498	0.5679	0.5667	0.4868	0.4841	0.4194	0.4185	0.8474	0.8499	0.5446	0.5435	0.4432	0.4416	0.359	0.3606	0.8468	0.8462	0.5409	0.5402	0.423	0.4215	0.3554	0.3547	0.8454	0.8443	0.5711	0.5701	0.48	0.4797	0.4188	0.4188	0.8517	0.8517	0.5169	0.5173	0.403	0.4024	0.307	0.3099	0.8509	0.8513	0.5498	0.5498	0.4884	0.4887	0.3324	0.3307	0.8504
Pyr 175 (M1)	0.105	0.1052	0.1066	0.1071	0.1154	0.1151	0.1174	0.117	0.1065	0.1048	0.1017	0.1017	0.1125	0.1134	0.1007	0.1012	0.1086	0.1086	0.0982	0.098	0.1016	0.1017	0.0926	0.0941	0.1049	0.1053	0.1079	0.108	0.1225	0.1231	0.1212	0.122	0.1049	0.1052	0.1061	0.1062	0.1029	0.1042	0.0929	0.0932	0.1054	0.1047	0.0986	0.0984	0.1155	0.1156	0.1048	0.1051	0.1067
Pyr 176 (M2)	0.0393	0.0394	0.0696	0.0697	0.0834	0.0835	0.0911	0.0915	0.0391	0.0396	0.0659	0.0646	0.0877	0.0884	0.0843	0.0839	0.0395	0.0397	0.0618	0.0618	0.0778	0.0779	0.0761	0.077	0.0396	0.0403	0.0704	0.0705	0.09	0.0892	0.093	0.0919	0.0396	0.039	0.0754	0.0752	0.0823	0.0825	0.0835	0.0825	0.0393	0.0396	0.0645	0.0643	0.0841	0.0845	0.0956	0.0962	0.0396
Pyr 177 (M3)	0.0052	0.0053	0.2338	0.2342	0.2869	0.2896	0.3397	0.3404	0.0055	0.0052	0.2623	0.2637	0.3254	0.3257	0.4165	0.415	0.0026	0.0034	0.2743	0.2744	0.3636	0.3645	0.435	0.4333	0.0093	0.0093	0.2289	0.2298	0.2802	0.2811	0.3357	0.3358	0.0036	0.0037	0.2752	0.2754	0.3763	0.3754	0.4726	0.4705	0.0041	0.004	0.2623	0.263	0.285	0.284	0.4251	0.4269	0.0029
Pyr 178 (M4)	0.0004	0.0003	0.0221	0.0223	0.0275	0.0277	0.0324	0.0325	0.0015	0.0005	0.0254	0.0264	0.0312	0.0308	0.0394	0.0392	0.0025	0.002	0.0248	0.0256	0.034	0.0344	0.041	0.041	0.0008	0.0009	0.0218	0.0217	0.0273	0.0269	0.0314	0.0316	0.0003	0.0004	0.0263	0.026	0.0355	0.0356	0.044	0.0438	0.0003	0.0003	0.0247	0.0244	0.027	0.0273	0.0422	0.0411	0.0003
Corrected Data
Pyr 174 (M0)	0.996553	0.996212	0.659128	0.65771	0.563704	0.560515	0.484558	0.48355	0.993231	0.996307	0.631282	0.62989	0.512354	0.51058	0.413405	0.415277	0.992492	0.99193	0.626724	0.625844	0.488195	0.486425	0.40883	0.408049	0.990862	0.989465	0.66291	0.66174	0.55599	0.555654	0.48395	0.483933	0.998395	0.998475	0.598898	0.599262	0.464849	0.464119	0.35265	0.356046	0.99754	0.998113	0.637361	0.637372	0.565631	0.565919	0.382484	0.3806	0.997095
Pyr 175 (M1)	0.000355982	0.000630751	0.04209	0.0428321	0.063514	0.0635441	0.0751425	0.0748169	0.00248057	0.000152622	0.0397083	0.0398562	0.0662312	0.0674957	0.0643447	0.0646945	0.00500083	0.00508723	0.036202	0.0360677	0.0565181	0.0568386	0.0555647	0.0573731	0.000911057	0.00153171	0.0431345	0.0433901	0.0726269	0.0733582	0.0795839	0.0804954	1.15274e-05	0.000359424	0.0486426	0.0486927	0.0607797	0.0623423	0.0625992	0.0625458	0.000705608	-0.000163293	0.0354223	0.0351935	0.0634111	0.0634767	0.0726914	0.0732852	0.00228489
Pyr 176 (M2)	0.000607713	0.000707607	0.0449827	0.0450741	0.062314	0.0625556	0.0730431	0.0735832	0.000283493	0.000984846	0.0421915	0.0407491	0.0690071	0.0697524	0.0694121	0.0688459	0.000493796	0.000745114	0.0381036	0.03815	0.0598188	0.059968	0.0612612	0.0621136	0.00113564	0.00192679	0.0456149	0.0457511	0.069154	0.0681831	0.0747437	0.0733958	0.000906409	0.000179598	0.0533795	0.0531168	0.0654157	0.065493	0.0711804	0.069928	0.000527119	0.000946895	0.0408142	0.0406135	0.0630451	0.0634683	0.0825152	0.0832295	0.000722216
Pyr 177 (M3)	0.0026127	0.0027054	0.254191	0.254594	0.310745	0.31372	0.367738	0.368509	0.00290312	0.00258446	0.286306	0.287964	0.35266	0.352926	0.453146	0.451543	-0.000514981	0.000365995	0.300214	0.300296	0.396152	0.397102	0.474469	0.472444	0.00720419	0.00710136	0.248592	0.249579	0.30227	0.303352	0.36297	0.363164	0.000776204	0.000947469	0.299233	0.299429	0.40943	0.408318	0.514464	0.512343	0.00135454	0.00123533	0.286634	0.287454	0.308582	0.307382	0.460797	0.462801	-9.3272e-05
Pyr 178 (M4)	-0.000129303	-0.000256067	-0.000392074	-0.000210239	-0.000276497	-0.00033396	-0.000481812	-0.000459129	0.00110132	-2.87763e-05	0.000512176	0.00154052	-0.000252642	-0.00075395	-0.000307802	-0.000360097	0.00252875	0.00187145	-0.00124348	-0.000358227	-0.000684198	-0.000332946	-0.000124534	1.99526e-05	-0.000112749	-2.52353e-05	-0.000251853	-0.000459844	-4.15305e-05	-0.000547545	-0.00124799	-0.000987974	-8.92571e-05	3.88538e-05	-0.00015251	-0.000500515	-0.000474466	-0.000272996	-0.00089355	-0.000862638	-0.000126919	-0.000131831	-0.000231729	-0.00063279	-0.000669135	-0.00024596	0.00151247	8.34187e-05	-8.65529e-06
Atom Percent Enrichment	0.0031365	0.00338739	0.29821	0.29892	0.373459	0.376605	0.441481	0.442504	0.00391897	0.0032919	0.32767	0.328416	0.420742	0.421926	0.520869	0.519005	0.00148116	0.00255848	0.337683	0.337752	0.454871	0.456026	0.533831	0.532977	0.00826497	0.00889645	0.29338	0.294543	0.372582	0.373261	0.439327	0.438927	0.00138432	0.00118701	0.351033	0.351071	0.473301	0.472761	0.582784	0.57981	0.00194115	0.00181217	0.325651	0.326261	0.371749	0.370853	0.540038	0.542716	0.00114984
Ser 390 (M0)	0.6437	0.6433	0.5985	0.5996	0.5748	0.5766	0.5525	0.5527	0.6467	0.6426	0.6098	0.6099	0.5883	0.5882	0.5631	0.5649	0.6445	0.6442	0.6131	0.6126	0.5952	0.5941	0.5736	0.5752	0.6406	0.6423	0.5917	0.5932	0.5531	0.5539	0.5469	0.5463	0.6424	0.6423	0.6103	0.6106	0.597	0.5964	0.5791	0.5775	0.6439	0.6449	0.6158	0.616	0.6004	0.6034	0.5229	0.5201	0.64
Ser 391 (M1)	0.222	0.222	0.2253	0.2245	0.2291	0.2279	0.2331	0.2324	0.2218	0.2237	0.2258	0.2253	0.231	0.2305	0.2352	0.2344	0.2226	0.2229	0.2255	0.225	0.228	0.2297	0.2331	0.2314	0.2236	0.2229	0.2232	0.2236	0.2276	0.2277	0.232	0.2329	0.2231	0.2242	0.2271	0.2281	0.23	0.2295	0.2316	0.2323	0.2227	0.2218	0.224	0.2227	0.2287	0.2278	0.239	0.2416	0.2244
Ser 392 (M2)	0.1039	0.1041	0.1104	0.1107	0.1166	0.1168	0.1236	0.124	0.1022	0.103	0.1087	0.1094	0.1161	0.1159	0.1225	0.1218	0.1035	0.1036	0.1093	0.1089	0.1138	0.114	0.1177	0.1177	0.1045	0.1036	0.1131	0.1112	0.1204	0.1204	0.1238	0.1245	0.1033	0.1031	0.11	0.1099	0.1144	0.1144	0.1174	0.118	0.1027	0.1032	0.1084	0.1096	0.1129	0.1115	0.1304	0.132	0.1051
Ser 393 (M3)	0.0239	0.0242	0.0476	0.047	0.0567	0.0563	0.0642	0.0644	0.0233	0.0242	0.0407	0.0406	0.047	0.0475	0.0569	0.0567	0.0238	0.024	0.0387	0.0398	0.046	0.0455	0.0544	0.0539	0.0245	0.0244	0.0516	0.052	0.069	0.0689	0.0686	0.068	0.0246	0.0239	0.0389	0.0377	0.0433	0.044	0.0516	0.052	0.024	0.0237	0.0381	0.0383	0.0422	0.0423	0.0761	0.0745	0.0238
Ser 394 (M4)	0.0055	0.0055	0.0132	0.0135	0.0162	0.0163	0.0188	0.0189	0.0054	0.0056	0.0113	0.0115	0.0133	0.0131	0.0164	0.0163	0.0053	0.0053	0.0103	0.0106	0.0127	0.0125	0.0153	0.0157	0.0059	0.0058	0.0149	0.0147	0.021	0.0202	0.0206	0.0206	0.0057	0.0056	0.0104	0.0105	0.0119	0.0121	0.015	0.0151	0.0057	0.0055	0.0105	0.0102	0.0118	0.011	0.0225	0.0226	0.0056
Ser 395 (M5)	0.0009	0.0009	0.0043	0.0042	0.0055	0.0051	0.0065	0.0065	0.0006	0.0009	0.0032	0.0028	0.0038	0.0041	0.005	0.0049	0.0002	0	0.0029	0.0029	0.0037	0.0038	0.0048	0.005	0.0009	0.001	0.0048	0.005	0.0076	0.0076	0.007	0.0068	0.0009	0.0009	0.0029	0.0028	0.003	0.0031	0.0046	0.0044	0.0009	0.0008	0.003	0.0029	0.0034	0.0033	0.0076	0.008	0.0009
Ser 396 (M6)	0	0	0.0008	0.0006	0.001	0.001	0.0012	0.0012	0	0	0.0006	0.0005	0.0005	0.0007	0.0009	0.0009	0	0	0.0001	0.0002	0.0005	0.0004	0.001	0.001	0	0	0.0006	0.0004	0.0012	0.0014	0.0011	0.0009	0	0	0.0003	0.0003	0.0003	0.0004	0.0007	0.0007	0	0	0.0001	0.0002	0.0006	0.0006	0.0015	0.0012	0.0001
Corrected Data
Ser 390 (M0)	1.00467	1.00394	0.933713	0.93554	0.896882	0.899616	0.862043	0.862185	1.00926	1.00286	0.951409	0.951728	0.918039	0.917771	0.878591	0.881489	1.00593	1.00537	0.956961	0.956048	0.928884	0.927111	0.894995	0.897503	0.999743	1.00239	0.923424	0.925665	0.863033	0.863989	0.853311	0.852467	1.00255	1.00239	0.952496	0.952974	0.931779	0.930799	0.903625	0.901136	1.00499	1.00654	0.961184	0.961433	0.936838	0.941585	0.815726	0.811475	0.998842
Ser 391 (M1)	-0.00460278	-0.00438649	0.0248715	0.0230464	0.0435258	0.0406993	0.0617265	0.0605263	-0.0065298	-0.00138447	0.0195496	0.0187272	0.0391796	0.0384571	0.0592502	0.0570503	-0.00410819	-0.00348281	0.0173138	0.0168093	0.0308287	0.0340445	0.0503462	0.0468598	-0.000459738	-0.00245761	0.0253073	0.0251127	0.0529175	0.0526225	0.06305	0.0647697	-0.00220281	-0.000450737	0.021293	0.0226752	0.032948	0.0324983	0.0450664	0.0470105	-0.00363002	-0.00555911	0.0135409	0.0114251	0.0290986	0.0260929	0.0867854	0.0923211	0.00109904
Ser 392 (M2)	0.000144643	0.000477212	0.0114314	0.0122296	0.0205449	0.0213465	0.0306779	0.0316305	-0.00255179	-0.00203391	0.00781095	0.00913281	0.017884	0.0178418	0.0271933	0.0264185	-0.000830848	-0.000812789	0.00866149	0.00834195	0.0154556	0.0149559	0.0202378	0.0210081	0.000444249	-0.000683686	0.0171062	0.0138946	0.0285965	0.0284808	0.0319324	0.0325802	-0.001252	-0.00211934	0.00909259	0.00840253	0.0152169	0.0155154	0.0201826	0.0208457	-0.00206355	-0.00090252	0.0078792	0.0103699	0.0133637	0.0114885	0.0400138	0.0413085	0.000987663
Ser 393 (M3)	0.000110622	0.000445151	0.0302242	0.0292854	0.0394648	0.0389342	0.0459402	0.046096	0.000207452	0.000831443	0.0211657	0.0207132	0.0255895	0.026472	0.0358279	0.0360224	0.000153125	0.000369163	0.0180399	0.0199089	0.0257765	0.024743	0.0350963	0.0345439	0.000451353	0.00088012	0.0347597	0.0363448	0.0552056	0.0550679	0.0522917	0.0509497	0.00132105	0.000277669	0.0177399	0.0159188	0.0213458	0.0224092	0.0313969	0.0315749	0.000814504	0.000228426	0.0178209	0.0176324	0.0206826	0.0217406	0.0586552	0.0551292	-0.000990703
Ser 394 (M4)	-0.000181897	-0.000341258	-0.000262502	0.000416023	-0.000398746	-0.000128973	-0.000425868	-0.000435382	7.90499e-05	-2.2473e-05	0.000331541	0.000602679	-6.64228e-07	-0.000550411	-0.000365624	-0.000403925	-0.000375494	-0.00046464	-0.000281754	-0.000347926	-0.000389778	-0.000386821	-0.000551421	0.000210633	0.000163927	9.82343e-05	7.54265e-05	-0.000249276	0.000585828	-0.0005691	0.00011619	0.000391588	-0.000115324	0.000137204	-0.000205372	0.000576075	-0.000255924	-0.000313158	0.000288828	0.000234528	0.00020017	-4.0457e-05	0.000306923	-0.000398518	0.000175663	-0.00101279	-0.00079278	0.000122236	3.702e-05
Ser 395 (M5)	4.95008e-05	3.68988e-05	0.000100314	-0.000136545	0.000139149	-0.000477908	0.000226845	0.000181663	-0.000400163	-6.10076e-05	-0.000228535	-0.000887355	-0.000346613	0.000153432	-0.000403723	-0.000531	-0.000925878	-0.00123764	-2.81103e-05	-0.000275738	-0.000266006	3.37439e-05	-0.00024877	-0.000104716	-0.000149571	8.16397e-06	-0.000120728	0.000149698	0.0003012	0.000689076	-0.000197053	-0.000416122	-0.00012537	-3.15348e-05	-4.84486e-05	-0.000158683	-0.000704931	-0.000702732	-0.000220318	-0.000567311	-0.00011218	-0.000123464	2.17561e-05	5.52082e-05	-5.01903e-05	9.64725e-05	-0.000391086	0.000377321	7.99249e-05
Ser 396 (M6)	-0.000185553	-0.000171024	-7.75521e-05	-0.000381377	-0.000157904	1.04098e-05	-0.000188404	-0.000184155	-6.28534e-05	-0.000184738	-3.80392e-05	-1.62963e-05	-0.000344591	-0.000144837	-9.34586e-05	-4.50506e-05	0.000158311	0.000262718	-0.000666316	-0.000484331	-0.000288856	-0.000501484	0.000124507	-2.10901e-05	-0.000193021	-0.000235881	-0.000552325	-0.000916986	-0.000639866	-0.000280117	-0.000504668	-0.000742559	-0.00017131	-0.000200745	-0.000367343	-0.000388287	-0.000329251	-0.000206475	-0.000339091	-0.000234065	-0.000199101	-0.00014689	-0.000754171	-0.000517456	-0.00010886	8.95229e-06	3.26274e-06	-0.00073373	-5.45228e-05
Atom Percent Enrichment	-0.00132721	-0.00069887	0.0461356	0.0451206	0.06767	0.0667316	0.0869676	0.0873584	-0.00367034	-0.00098599	0.0328895	0.0330441	0.0505721	0.0511855	0.0737068	0.0726514	-0.00177017	-0.00133363	0.0295855	0.0310733	0.0463564	0.0460617	0.0653703	0.0641693	0.000594273	-0.000394874	0.0545996	0.0539787	0.0919091	0.0915959	0.0945966	0.0942598	-0.000247889	-0.00128547	0.0308993	0.0290789	0.0424731	0.0435856	0.0598741	0.0611422	-0.0017712	-0.00222629	0.0275874	0.028354	0.0392913	0.0380972	0.11426	0.113442	3.40857e-05
Suc 289 (M0)	0.7259	0.7257	0.6416	0.645	0.5314	0.5808	0.6111	0.6174	0.7039	0.7124	0.7179	0.6695	0.6641	0.654	0.6556	0.6403	0.7123	0.7207	0.6522	0.6598	0.6534	0.6401	0.6768	0.6579	0.7349	0.7353	0.6736	0.6739	0.6292	0.6249	0.6187	0.6106	0.7183	0.7119	0.701	0.6881	0.6966	0.6879	0.6556	0.6549	0.7313	0.7327	0.6717	0.6791	0.6754	0.6692	0.606	0.5956	0.7335
Suc 290 (M1)	0.1858	0.189	0.2244	0.2209	0.2612	0.245	0.2254	0.2199	0.2074	0.2035	0.1814	0.2039	0.1999	0.208	0.2029	0.2155	0.1887	0.188	0.2096	0.2039	0.2021	0.2126	0.2011	0.213	0.1764	0.178	0.1959	0.1963	0.2077	0.2072	0.2106	0.2147	0.1851	0.1958	0.1861	0.1911	0.1893	0.1989	0.2077	0.2084	0.1795	0.1847	0.2071	0.2031	0.1953	0.1982	0.201	0.2045	0.1776
Suc 291 (M2)	0.0726	0.0698	0.0913	0.0934	0.13	0.1087	0.1067	0.1079	0.0719	0.0683	0.0811	0.0931	0.0959	0.0951	0.0961	0.0961	0.0744	0.0747	0.0986	0.0972	0.1012	0.1039	0.0891	0.0928	0.0721	0.0719	0.0985	0.0991	0.1172	0.1205	0.1197	0.1233	0.0728	0.0728	0.0804	0.0858	0.0831	0.0838	0.0892	0.0909	0.0697	0.0672	0.0876	0.0873	0.0903	0.0953	0.1242	0.1284	0.0748
Suc 292 (M3)	0.0127	0.0124	0.0262	0.0257	0.0413	0.0358	0.0358	0.0352	0.0111	0.0123	0.0147	0.0211	0.0255	0.0273	0.0267	0.03	0.014	0.0115	0.0275	0.0275	0.03	0.0308	0.0224	0.0248	0.012	0.0118	0.0233	0.0222	0.0311	0.0342	0.034	0.0363	0.014	0.0138	0.0212	0.0226	0.0195	0.0182	0.026	0.0278	0.0121	0.0112	0.0224	0.0214	0.0232	0.0239	0.0484	0.0488	0.012
Suc 293 (M4)	0.003	0.003	0.0165	0.015	0.0361	0.0297	0.021	0.0195	0.0057	0.0034	0.005	0.0124	0.0147	0.0157	0.0187	0.0181	0.0106	0.0051	0.0122	0.0116	0.0133	0.0126	0.0105	0.0114	0.0045	0.003	0.0087	0.0085	0.0148	0.0132	0.017	0.0151	0.0097	0.0056	0.0114	0.0124	0.0116	0.0112	0.0216	0.018	0.0075	0.0043	0.0112	0.0091	0.0159	0.0134	0.0204	0.0226	0.0022
Corrected Data
Suc 289 (M0)	0.985294	0.985078	0.867274	0.872316	0.714339	0.782017	0.824871	0.833866	0.95476	0.966909	0.973848	0.906305	0.898158	0.884161	0.885656	0.865033	0.964631	0.977728	0.882713	0.893209	0.884073	0.866299	0.916653	0.890816	0.997164	0.998062	0.912868	0.913389	0.851229	0.845758	0.836417	0.825922	0.973071	0.965613	0.948818	0.931239	0.942945	0.931462	0.884702	0.884755	0.991139	0.993981	0.909445	0.920069	0.913085	0.905547	0.817947	0.803533	0.995814
Suc 290 (M1)	0.0171627	0.0215245	0.095571	0.0898534	0.178902	0.141935	0.106477	0.0971854	0.0531672	0.0452453	0.0138069	0.0593546	0.05567	0.0697002	0.062323	0.084038	0.0253508	0.0217694	0.0724946	0.0624529	0.0620521	0.0803687	0.0533025	0.0752605	0.00166095	0.00368181	0.0473861	0.0478325	0.077258	0.0779924	0.0844268	0.0925425	0.0186185	0.035045	0.0254622	0.0362686	0.0311535	0.0467992	0.0686632	0.0698991	0.00696542	0.0135023	0.0629487	0.0552656	0.0458949	0.0517976	0.0755169	0.0834604	0.00372151
Suc 291 (M2)	-0.00413118	-0.00880474	0.014148	0.0177802	0.0606462	0.0345367	0.0360241	0.0389004	-0.010231	-0.0143609	0.00897127	0.0210248	0.0262437	0.0233545	0.0260943	0.0232401	-0.00177986	-0.00168738	0.0276437	0.0270488	0.0332625	0.0344962	0.0161324	0.0185989	-0.00250615	-0.00328042	0.0303707	0.0310313	0.0542295	0.059035	0.057265	0.0613214	-0.00318266	-0.0060247	0.00764036	0.0140718	0.0105219	0.00909142	0.015514	0.0176109	-0.00640091	-0.0113809	0.0126436	0.013008	0.0195205	0.0256642	0.0667737	0.0718688	0.000802373
Suc 292 (M3)	0.000598572	0.000792077	0.00861023	0.00766421	0.0125145	0.0135103	0.0160352	0.0154117	-0.00317825	-0.000138934	0.000907972	0.00336408	0.00845988	0.0102962	0.00958082	0.0127517	0.00129889	-0.00183228	0.00943475	0.0103683	0.012473	0.0117904	0.0065482	0.00745802	0.000624385	0.000325669	0.00532253	0.00369103	0.00847463	0.0115381	0.0111341	0.0126878	0.00211821	0.00103126	0.00893969	0.00863206	0.00564443	0.00293633	0.0103026	0.0121265	0.00115755	0.000387502	0.00647455	0.0056745	0.00758025	0.00676217	0.0289798	0.0278455	-0.000251595
Suc 293 (M4)	0.0010755	0.0014101	0.0143964	0.0123866	0.0335984	0.0280013	0.0165927	0.0146362	0.00548175	0.00234546	0.0024659	0.00995149	0.0114682	0.0124884	0.0163457	0.0149368	0.0104994	0.00402206	0.00771388	0.00692124	0.00813939	0.00704555	0.00736342	0.00786674	0.00305674	0.00121057	0.00405243	0.00405635	0.00880899	0.00567699	0.010757	0.00752619	0.00937442	0.00433511	0.00913942	0.00978891	0.00973508	0.00971133	0.0208184	0.0156087	0.00713852	0.00350996	0.0084878	0.00598292	0.0139197	0.0102286	0.010782	0.0132924	-8.65452e-05
Atom Percent Enrichment	0.00374952	0.00298291	0.0518208	0.0494882	0.118033	0.0908861	0.0732504	0.0699416	0.0112744	0.0063721	0.0110842	0.0378256	0.0448525	0.0493128	0.0521592	0.0571301	0.0169214	0.00724651	0.0467354	0.0438351	0.0496384	0.0532286	0.0336664	0.0415748	0.00268719	0.000735058	0.0350762	0.0342984	0.0615942	0.0633461	0.0688468	0.0708384	0.0140264	0.0108575	0.0260299	0.032366	0.0270177	0.0281591	0.0534682	0.0509838	0.00654758	0.0014857	0.0354027	0.0305592	0.0408389	0.0410817	0.084783	0.090976	0.00105632
Fum 287 (M0)	0.7299	0.7292	0.5649	0.6326	0.4735	0.5154	0.6934	0.7067	0.7124	0.7091	0.7143	0.6988	0.7061	0.7063	0.7073	0.6945	0.7176	0.7248	0.7154	0.7139	0.7101	0.7083	0.7044	0.6999	0.726	0.7255	0.7062	0.7014	0.6953	0.694	0.7018	0.7086	0.7207	0.7209	0.7093	0.7007	0.7074	0.7097	0.6988	0.6952	0.727	0.7267	0.7216	0.7224	0.7051	0.7073	0.7037	0.6948	0.7286
Fum 288 (M1)	0.1772	0.1769	0.1492	0.157	0.1157	0.1404	0.1719	0.1742	0.1736	0.1695	0.1761	0.1758	0.1794	0.1755	0.1773	0.1759	0.18	0.1817	0.1772	0.1779	0.1804	0.1815	0.1769	0.1766	0.1781	0.1779	0.1796	0.1802	0.1805	0.1802	0.1811	0.1797	0.178	0.179	0.177	0.1795	0.178	0.1769	0.181	0.1789	0.1769	0.1791	0.1785	0.1775	0.1799	0.1785	0.1822	0.184	0.1805
Fum 289 (M2)	0.0744	0.0728	0.0691	0.0691	0.0738	0.0736	0.0767	0.0746	0.0779	0.0733	0.0773	0.079	0.0771	0.0776	0.0768	0.0786	0.0818	0.0763	0.0779	0.078	0.0795	0.0805	0.0781	0.0795	0.0747	0.0757	0.0806	0.0801	0.085	0.0854	0.0835	0.0811	0.0763	0.0749	0.0788	0.0807	0.0761	0.0764	0.0758	0.0766	0.075	0.0745	0.0767	0.0766	0.0795	0.0801	0.0859	0.0891	0.0759
Fum 290 (M3)	0.0122	0.0128	0.0173	0.0149	0.034	0.0197	0.0168	0.0151	0.0154	0.0136	0.0141	0.0154	0.015	0.0144	0.0164	0.0175	0.0134	0.0121	0.0158	0.0155	0.0173	0.0168	0.0158	0.016	0.0132	0.0128	0.0182	0.02	0.0221	0.0228	0.0199	0.018	0.0144	0.0136	0.0161	0.0156	0.0155	0.0149	0.0167	0.0167	0.013	0.0131	0.0145	0.0145	0.0182	0.0173	0.0195	0.0215	0.0124
Fum 291 (M4)	0.0047	0.0063	0.1323	0.083	0.1758	0.1575	0.0189	0.0129	0.0168	0.0273	0.0054	0.0171	0.0095	0.0109	0.0102	0.0154	0.0071	0.0051	0.0062	0.0067	0.0067	0.0065	0.0067	0.0077	0.0063	0.0063	0.0077	0.0092	0.0088	0.0091	0.0071	0.0064	0.0081	0.0092	0.0096	0.0112	0.0089	0.0088	0.0108	0.0118	0.0065	0.0053	0.004	0.0045	0.0074	0.0072	0.0072	0.0071	0.0023
Fum 292 (M5)	0.0016	0.002	0.0672	0.0435	0.1272	0.0934	0.0223	0.0165	0.004	0.0073	0.0129	0.0138	0.0128	0.0152	0.012	0.018	0	0	0.0076	0.008	0.0059	0.0064	0.0181	0.0203	0.0017	0.0018	0.0077	0.0091	0.0082	0.0085	0.0066	0.0062	0.0025	0.0025	0.0092	0.0123	0.0141	0.0133	0.0167	0.0207	0.0017	0.0014	0.0048	0.0044	0.01	0.0096	0.0014	0.0035	0.0003
Corrected Data
Fum 287 (M0)	0.99042	0.989289	0.747423	0.844636	0.614723	0.676011	0.934568	0.954371	0.965405	0.959472	0.965896	0.944378	0.954857	0.954372	0.956613	0.937509	0.974213	0.983947	0.968916	0.966835	0.962426	0.959745	0.951103	0.944369	0.985045	0.984329	0.956505	0.949575	0.941729	0.939792	0.950921	0.960241	0.977563	0.977666	0.960144	0.947541	0.956186	0.959518	0.943954	0.937837	0.986291	0.986028	0.978204	0.979579	0.954275	0.957455	0.955066	0.942346	0.989156
Fum 288 (M1)	0.00464015	0.00446031	0.0192826	0.00847647	0.00383929	0.0229852	0.00912639	0.00798767	0.0053923	0.000947837	0.00811974	0.0126462	0.0151455	0.00985707	0.0119559	0.0141322	0.0123345	0.0123153	0.0092555	0.0106711	0.0152437	0.0172885	0.0123237	0.0133444	0.00709364	0.00698469	0.0154055	0.0177322	0.0200873	0.0200962	0.0188259	0.0147816	0.00865009	0.00992625	0.0109271	0.0169984	0.012853	0.0106527	0.0195888	0.0179038	0.00516302	0.00821242	0.00902816	0.00743407	0.0161458	0.0135733	0.0197265	0.0249702	0.00948972
Fum 289 (M2)	0.00061662	-0.00137414	0.0118329	0.00554377	0.0326053	0.0230029	0.00745514	0.00319339	0.00741202	0.00274494	0.00573492	0.00901576	0.00497977	0.00679574	0.00514129	0.00870944	0.0103565	0.00209595	0.00614079	0.00615409	0.00762775	0.00873063	0.00714714	0.00935473	0.000982508	0.00240098	0.00955989	0.00900624	0.0157869	0.0164838	0.0132262	0.0100507	0.00346063	0.00128862	0.00776272	0.0100429	0.00399608	0.00458391	0.00322118	0.00512175	0.00168113	0.000372592	0.00378343	0.0039042	0.00807281	0.00915586	0.015987	0.0202255	0.0016937
Fum 290 (M3)	6.92917e-05	0.00131468	0.00617552	0.00414494	0.0258398	0.00739632	0.00493838	0.00347219	0.00310895	0.00223599	0.00145415	0.00234339	0.00229408	0.00161881	0.00437274	0.00509454	-0.000912812	-0.00100465	0.00346961	0.00296939	0.00466232	0.00361111	0.00317429	0.00295601	0.00115178	0.000344064	0.00549044	0.00784182	0.00905297	0.00984524	0.00670502	0.00513689	0.0021595	0.00144693	0.00348119	0.00193285	0.00334837	0.00260091	0.00461574	0.0044363	0.000903115	0.0010292	0.00216437	0.0022753	0.00575377	0.00454465	0.00548172	0.0068795	-0.000334267
Fum 291 (M4)	0.00311915	0.00513512	0.162809	0.102192	0.208406	0.191862	0.0198712	0.0128163	0.0176202	0.0318839	0.00326558	0.0179097	0.00840422	0.0102514	0.00891648	0.0151559	0.00546726	0.00362919	0.00384184	0.00457554	0.0040474	0.00387431	0.00443645	0.00556515	0.00492312	0.00495805	0.00500466	0.00650497	0.00510125	0.00526763	0.003608	0.00334731	0.00682141	0.00857646	0.00809136	0.0102001	0.00752939	0.00752181	0.00973186	0.0109059	0.00519167	0.00368706	0.00145535	0.00209139	0.00468919	0.00460454	0.00371885	0.0028639	-8.25654e-05
Fum 292 (M5)	0.00113476	0.00117551	0.0524769	0.0350068	0.114587	0.0787424	0.0240412	0.0181595	0.00106152	0.00271541	0.0155296	0.0137066	0.0143196	0.0171047	0.013001	0.0193986	-0.0014585	-0.000983301	0.00837625	0.00879451	0.00599279	0.00675019	0.0218152	0.024411	0.000804214	0.000982841	0.00803471	0.00934009	0.00824289	0.00851562	0.00671349	0.00644205	0.00134511	0.00109526	0.00959395	0.0132846	0.0160868	0.0151228	0.0188888	0.0237954	0.000770089	0.000670948	0.00536489	0.00471593	0.0110632	0.0106667	2.02848e-05	0.00271515	7.76988e-05
Atom Percent Enrichment	0.00463947	0.00654914	0.178178	0.110192	0.245048	0.214657	0.0295841	0.0190141	0.025006	0.0351703	0.00925359	0.0273367	0.016401	0.0173276	0.0177557	0.0268645	0.0130445	0.00700252	0.0118283	0.0125474	0.0151689	0.0152701	0.0134717	0.0157956	0.00805162	0.00816277	0.0177538	0.0213225	0.0248063	0.0259175	0.0199563	0.0159207	0.0123339	0.0127875	0.0173154	0.0209208	0.015252	0.0144276	0.0197014	0.0212699	0.00800032	0.00669836	0.00722739	0.00760848	0.0170774	0.0159843	0.0207552	0.0243789	0.00288601
Urea 231 (M0)	0.6983	0.7015	0.6592	0.6589	0.6755	0.6572	0.6828	0.6844	0.7144	0.6692	0.7374	0.7266	0.6641	0.6558	0.6555	0.6561	0.7288	0.7301	0.6716	0.671	0.6717	0.6724	0.6639	0.6599	0.692	0.6936	0.7119	0.7113	0.713	0.7133	0.7076	0.6993	0.6934	0.6954	0.6771	0.676	0.6628	0.6613	0.6302	0.6297	0.681	0.6792	0.6883	0.688	0.6913	0.7005	0.6782	0.6779	0.761
Urea 232 (M1)	0.2018	0.1998	0.2274	0.2277	0.2176	0.2295	0.2145	0.2134	0.1912	0.2208	0.1766	0.1837	0.228	0.2333	0.2379	0.2375	0.1817	0.1808	0.2213	0.2216	0.2248	0.2241	0.2346	0.2374	0.2059	0.2048	0.1934	0.1937	0.1943	0.1941	0.2006	0.2059	0.2048	0.2034	0.2185	0.219	0.2315	0.2324	0.2585	0.2588	0.213	0.2141	0.2105	0.2105	0.2112	0.2051	0.2265	0.2266	0.1605
Urea 233 (M2)	0.0856	0.0847	0.0969	0.097	0.091	0.0965	0.0868	0.0863	0.081	0.0943	0.0735	0.0768	0.0907	0.0932	0.0876	0.0875	0.0768	0.0764	0.0909	0.0911	0.0863	0.0862	0.0825	0.0834	0.0875	0.0871	0.081	0.0812	0.0785	0.0784	0.0767	0.0792	0.0874	0.0868	0.0881	0.0887	0.0877	0.0882	0.0898	0.09	0.091	0.0915	0.0859	0.0861	0.0813	0.0788	0.0772	0.0774	0.0673
Urea 234 (M3)	0.012	0.0119	0.0139	0.0139	0.0133	0.0142	0.0135	0.0134	0.0113	0.0132	0.0105	0.0109	0.0146	0.0149	0.0161	0.0161	0.0107	0.0106	0.0137	0.0137	0.0147	0.0147	0.0162	0.0164	0.0122	0.0122	0.0116	0.0116	0.0121	0.012	0.0128	0.0132	0.0122	0.0121	0.0137	0.0138	0.0153	0.0154	0.0183	0.0184	0.0127	0.0128	0.013	0.013	0.0137	0.0132	0.0154	0.0154	0.0094
Urea 235 (M4)	0.0021	0.002	0.0024	0.0024	0.0023	0.0024	0.0022	0.0022	0.0019	0.0023	0.0018	0.0018	0.0024	0.0025	0.0025	0.0025	0.0018	0.0018	0.0023	0.0023	0.0023	0.0023	0.0025	0.0025	0.0021	0.0021	0.002	0.002	0.002	0.002	0.0021	0.0021	0.0021	0.0021	0.0023	0.0023	0.0024	0.0024	0.0028	0.0028	0.0022	0.0022	0.0022	0.0022	0.0022	0.0021	0.0024	0.0024	0.0016
Urea 236 (M5)	0.0002	0.0002	0.0002	0.0002	0.0002	0.0002	0.0002	0.0002	0.0002	0.0002	0.0002	0.0002	0.0002	0.0003	0.0003	0.0003	0.0002	0.0002	0.0002	0.0002	0.0003	0.0003	0.0003	0.0003	0.0002	0.0002	0.0002	0.0002	0.0002	0.0002	0.0002	0.0002	0.0002	0.0002	0.0002	0.0002	0.0003	0.0003	0.0004	0.0004	0.0002	0.0002	0.0002	0.0002	0.0002	0.0002	0.0003	0.0003	0.0002
Corrected Data
Urea 231 (M0)	0.917666	0.921783	0.866289	0.865808	0.887797	0.863664	0.89731	0.899501	0.938826	0.879426	0.96905	0.95486	0.872737	0.861802	0.861508	0.862211	0.957749	0.959552	0.882587	0.881886	0.882616	0.883625	0.872463	0.867295	0.909479	0.911491	0.935447	0.934752	0.9369	0.937386	0.9299	0.919088	0.911138	0.913856	0.889905	0.888372	0.87101	0.86904	0.82816	0.827421	0.894844	0.892569	0.904441	0.904138	0.908575	0.920665	0.891249	0.890855	1.00006
Urea 232 (M1)	0.0703894	0.0669035	0.114415	0.114876	0.0972053	0.117695	0.0911601	0.0892992	0.0521849	0.103087	0.026884	0.0390822	0.11385	0.123017	0.129094	0.128396	0.0358775	0.0343537	0.103078	0.103643	0.107588	0.106496	0.122483	0.127235	0.0774585	0.0755811	0.0557264	0.0562868	0.0565943	0.0562574	0.0662741	0.075453	0.0756285	0.0732664	0.0979361	0.0988788	0.118754	0.120337	0.162811	0.163322	0.0896949	0.0916286	0.0844396	0.0845305	0.0845427	0.0740831	0.108022	0.108234	-0.000531614
Urea 233 (M2)	0.0170297	0.0161887	0.0273783	0.0274453	0.0212931	0.0264304	0.016204	0.0157469	0.0128528	0.0251223	0.00553708	0.00862036	0.0188703	0.021233	0.012774	0.0127112	0.00901043	0.00864837	0.0204292	0.0206489	0.0135297	0.0135418	0.00650225	0.00718165	0.0188085	0.018478	0.0124272	0.012646	0.00887761	0.00878273	0.00521856	0.00758276	0.018878	0.0183456	0.0171929	0.0179065	0.0141354	0.0146403	0.0117718	0.0119822	0.0221596	0.0226325	0.015747	0.0160264	0.00940851	0.0071997	0.00087102	0.00112283	0.000266489
Urea 234 (M3)	-0.00494628	-0.00465872	-0.00772129	-0.0077704	-0.00605741	-0.00739185	-0.00437297	-0.00427583	-0.00370689	-0.00736227	-0.00146668	-0.00244373	-0.0051343	-0.00587589	-0.00313701	-0.00307492	-0.00254096	-0.00248757	-0.00580853	-0.005891	-0.00351594	-0.00343465	-0.00131458	-0.00153537	-0.00555111	-0.00534908	-0.00349718	-0.0035794	-0.00222767	-0.00231396	-0.00133121	-0.00194319	-0.00543069	-0.00528181	-0.0048035	-0.00488099	-0.00367673	-0.00376038	-0.00257881	-0.00252847	-0.00645306	-0.00655522	-0.00444062	-0.00449913	-0.00231483	-0.00176749	-0.000207385	-0.000271408	0.000146023
Urea 235 (M4)	-0.000418685	-0.000503396	-0.000753266	-0.000753696	-0.000543161	-0.000769243	-0.000524564	-0.000487957	-0.000406111	-0.000660489	-0.000132753	-0.000310446	-0.000546419	-0.000551977	-0.000440392	-0.000441348	-0.000294391	-0.000260243	-0.000574399	-0.000581397	-0.000491324	-0.000498146	-0.000214295	-0.000271066	-0.000513035	-0.000508358	-0.000314724	-0.000321696	-0.000276445	-0.000247925	-0.000105547	-0.000267209	-0.000526511	-0.000489246	-0.000454164	-0.000507812	-0.000482814	-0.000523266	-0.000387565	-0.000420371	-0.00059893	-0.00063596	-0.000410944	-0.000423383	-0.000300593	-0.000257281	4.26695e-05	3.22475e-05	-1.74272e-05
Urea 236 (M5)	0.000279557	0.000287305	0.000392206	0.000394926	0.000305153	0.000371786	0.000223799	0.000216513	0.000249148	0.000387877	0.000127871	0.000191607	0.000223773	0.000376156	0.00020147	0.000198222	0.000198109	0.000193422	0.000289153	0.000294229	0.000273951	0.000270176	8.07797e-05	9.52017e-05	0.000318196	0.00030687	0.000211222	0.00021629	0.000132271	0.000135646	4.43979e-05	8.69079e-05	0.000312975	0.000302836	0.000223724	0.000231525	0.000259568	0.000266458	0.000224151	0.000223109	0.000353997	0.000361548	0.000223812	0.000228099	8.91626e-05	7.64982e-05	2.22288e-05	2.66503e-05	7.32664e-05
Atom Percent Enrichment	0.0703894	0.0669035	0.114415	0.114876	0.0972053	0.117695	0.0911601	0.0892992	0.0521849	0.103087	0.026884	0.0390822	0.11385	0.123017	0.129094	0.128396	0.0358775	0.0343537	0.103078	0.103643	0.107588	0.106496	0.122483	0.127235	0.0774585	0.0755811	0.0557264	0.0562868	0.0565943	0.0562574	0.0662741	0.075453	0.0756285	0.0732664	0.0979361	0.0988788	0.118754	0.120337	0.162811	0.163322	0.0896949	0.0916286	0.0844396	0.0845305	0.0845427	0.0740831	0.108022	0.108234	-0.000531614
Norvaline 186 (M0)	0.7674	0.7699	0.73	0.7278	0.759	0.7315	0.7353	0.7356	0.7892	0.7429	0.7938	0.7925	0.7482	0.737	0.7483	0.7518	0.7959	0.7957	0.7391	0.7393	0.7389	0.7394	0.7684	0.7621	0.7406	0.7428	0.7418	0.7422	0.7419	0.7425	0.7545	0.7422	0.7424	0.7449	0.7477	0.7481	0.747	0.7473	0.7477	0.7496	0.7472	0.742	0.746	0.7468	0.7638	0.7702	0.8022	0.7988	0.7304
Norvaline 187 (M1)	0.158	0.1578	0.1704	0.1727	0.1678	0.1779	0.1828	0.1824	0.1474	0.1751	0.1437	0.1451	0.1748	0.1803	0.1741	0.1719	0.1431	0.1429	0.1798	0.1797	0.1801	0.1798	0.1593	0.1633	0.1793	0.1779	0.1783	0.1781	0.1777	0.1774	0.17	0.1777	0.1777	0.1762	0.1742	0.174	0.1746	0.1745	0.1741	0.1727	0.1748	0.1742	0.1752	0.1747	0.1622	0.1579	0.1389	0.1402	0.1853
Norvaline 188 (M2)	0.0528	0.0515	0.0669	0.0671	0.053	0.0632	0.0586	0.0587	0.0462	0.0584	0.0453	0.0456	0.0554	0.059	0.0557	0.0549	0.0446	0.045	0.058	0.0579	0.0578	0.0578	0.0516	0.053	0.0574	0.057	0.0572	0.0572	0.0575	0.0573	0.0544	0.0573	0.0572	0.0565	0.056	0.0559	0.0562	0.056	0.056	0.0557	0.0559	0.0592	0.0564	0.0562	0.0526	0.0512	0.0431	0.0444	0.0596
Norvaline 189 (M3)	0.0183	0.0175	0.0271	0.0268	0.0171	0.0229	0.0197	0.0197	0.0145	0.0198	0.0145	0.0142	0.0183	0.02	0.0185	0.0181	0.0139	0.014	0.0196	0.0195	0.0196	0.0195	0.0175	0.0183	0.0192	0.0189	0.0191	0.019	0.0193	0.0192	0.0179	0.0193	0.0191	0.0189	0.0187	0.0186	0.0188	0.0187	0.0188	0.0186	0.0187	0.0207	0.019	0.0189	0.018	0.0174	0.0134	0.014	0.0208
Norvaline 190 (M4)	0.0035	0.0033	0.0057	0.0056	0.0031	0.0046	0.0036	0.0036	0.0026	0.0037	0.0027	0.0025	0.0033	0.0037	0.0034	0.0033	0.0025	0.0025	0.0036	0.0036	0.0036	0.0036	0.0032	0.0034	0.0035	0.0035	0.0035	0.0035	0.0036	0.0036	0.0033	0.0036	0.0036	0.0035	0.0034	0.0034	0.0035	0.0034	0.0034	0.0034	0.0034	0.0039	0.0035	0.0035	0.0034	0.0033	0.0024	0.0026	0.0038
Corrected Data
Norvaline 186 (M0)	0.93394	0.937021	0.887936	0.885371	0.923809	0.889984	0.894881	0.895247	0.960739	0.904199	0.966218	0.964773	0.910629	0.896931	0.910733	0.91501	0.968814	0.968474	0.899413	0.899747	0.899258	0.899778	0.935213	0.927417	0.901347	0.903937	0.902898	0.903296	0.902912	0.903643	0.918204	0.903185	0.903522	0.906579	0.910001	0.910489	0.909043	0.909605	0.909999	0.912313	0.909392	0.90297	0.907824	0.908797	0.929581	0.937386	0.976496	0.972322	0.888964
Norvaline 187 (M1)	0.035355	0.0346112	0.057798	0.0610167	0.0488527	0.0665362	0.0716887	0.0711466	0.0182002	0.0608899	0.0128146	0.0147647	0.0594578	0.0683345	0.0585937	0.0552399	0.0116688	0.0114672	0.0673033	0.0671494	0.0677115	0.0672428	0.0367204	0.0428015	0.0664068	0.0642712	0.0649673	0.0646394	0.064217	0.0637348	0.0524023	0.06415	0.0641163	0.0618069	0.0588351	0.0585137	0.0594509	0.0592829	0.0587146	0.0566458	0.0596583	0.0599791	0.0603748	0.0596115	0.0411386	0.034671	0.00534016	0.00759146	0.0756911
Norvaline 188 (M2)	0.0156728	0.0141049	0.0309966	0.0308603	0.0142778	0.025166	0.0186937	0.0188805	0.00929023	0.0197183	0.00880138	0.00892873	0.0160787	0.0195969	0.0165639	0.0159412	0.00803146	0.00854899	0.0184493	0.0183462	0.0181616	0.0182043	0.013979	0.0150432	0.0177957	0.0175281	0.0177182	0.0177445	0.018183	0.0179869	0.0156364	0.017936	0.0178142	0.017203	0.0169164	0.0168254	0.0170941	0.0168713	0.016935	0.0167951	0.0166969	0.0208567	0.0172433	0.01708	0.0147344	0.013722	0.00688326	0.00826729	0.0195323
Norvaline 189 (M3)	0.0137745	0.0130779	0.0211458	0.0206888	0.0120272	0.0166641	0.0135934	0.0135882	0.0108461	0.0139897	0.0111225	0.0106754	0.0127809	0.0139515	0.0129828	0.0127276	0.0105654	0.0106171	0.0136776	0.0135822	0.0137045	0.0135962	0.0130135	0.0135714	0.0133337	0.0130975	0.0132846	0.0131732	0.0134827	0.0134108	0.0126422	0.0135177	0.013302	0.0132411	0.0131603	0.0130674	0.0132275	0.0131514	0.0132805	0.0131442	0.0131591	0.0149266	0.013407	0.0133414	0.0133269	0.0130111	0.0103813	0.0108092	0.0146228
Norvaline 190 (M4)	0.00125775	0.00118494	0.00212361	0.00206281	0.00103346	0.00164941	0.0011428	0.00113775	0.000924757	0.00120362	0.00104372	0.000858256	0.00105354	0.00118643	0.00112623	0.0010815	0.000920775	0.000892989	0.00115705	0.00117499	0.00116428	0.00117822	0.00107461	0.00116705	0.001117	0.0011668	0.00113234	0.00114687	0.00120556	0.00122496	0.00111531	0.0012109	0.0012452	0.00117036	0.00108718	0.00110447	0.00118475	0.001089	0.00107082	0.00110222	0.00109341	0.00126763	0.00115135	0.00116957	0.00121874	0.0012094	0.000898946	0.0010098	0.00119002
Atom Percent Enrichment	0.0282638	0.0266986	0.0479308	0.0482638	0.0294059	0.0433645	0.0386069	0.0385559	0.0182545	0.0367775	0.0169899	0.0170204	0.033543	0.0385321	0.0337937	0.0324078	0.0157778	0.0159971	0.0374658	0.0373221	0.0374513	0.0372882	0.0270043	0.0295676	0.0366168	0.0358217	0.0361967	0.0360589	0.0364633	0.0362102	0.0315157	0.0363547	0.0361579	0.0351544	0.0341243	0.0339461	0.0345152	0.034209	0.0341774	0.0335193	0.0342258	0.0378857	0.034922	0.0346185	0.0288658	0.0264965	0.0134616	0.0151482	0.040846
Norvaline 260 (M0)	0.7246	0.7254	0.7259	0.7251	0.7253	0.7225	0.7215	0.7214	0.7294	0.7237	0.7299	0.7301	0.7239	0.7224	0.7236	0.7241	0.7308	0.7315	0.722	0.7219	0.7215	0.7214	0.7241	0.7231	0.7218	0.7221	0.7211	0.7215	0.7215	0.7214	0.7241	0.7214	0.7216	0.7219	0.7219	0.7219	0.7219	0.722	0.7218	0.722	0.7226	0.7223	0.7219	0.7222	0.7233	0.7248	0.7341	0.7323	0.721
Norvaline 261 (M1)	0.1874	0.1871	0.1866	0.1871	0.1868	0.1886	0.1893	0.1894	0.1845	0.1878	0.1838	0.1839	0.1879	0.1886	0.1879	0.1877	0.1836	0.1828	0.1888	0.189	0.1893	0.1893	0.1873	0.1879	0.1892	0.189	0.1893	0.1891	0.189	0.1892	0.1874	0.1891	0.189	0.189	0.1886	0.1888	0.1888	0.1887	0.1889	0.1886	0.1885	0.1888	0.1888	0.1887	0.1878	0.187	0.1812	0.1817	0.1896
Norvaline 262 (M2)	0.0738	0.0736	0.0735	0.0738	0.0738	0.0746	0.075	0.0749	0.0725	0.0743	0.0724	0.0724	0.0741	0.0747	0.0744	0.074	0.072	0.0719	0.0749	0.0748	0.075	0.075	0.0744	0.0748	0.0749	0.0746	0.0752	0.0751	0.0751	0.0751	0.0743	0.0751	0.0751	0.075	0.0751	0.075	0.075	0.075	0.075	0.075	0.0745	0.0747	0.075	0.0748	0.0746	0.0741	0.071	0.0721	0.075
Norvaline 263 (M3)	0.0119	0.0117	0.0118	0.0118	0.0119	0.012	0.012	0.0121	0.0115	0.0119	0.0117	0.0115	0.0119	0.0121	0.0119	0.0119	0.0115	0.0116	0.0121	0.0121	0.0121	0.0121	0.012	0.012	0.012	0.012	0.0121	0.0121	0.0121	0.012	0.012	0.0121	0.0121	0.012	0.0121	0.0121	0.012	0.0121	0.0121	0.0122	0.0121	0.012	0.012	0.012	0.012	0.0119	0.0115	0.0117	0.0121
Norvaline 264 (M4)	0.002	0.002	0.002	0.002	0.002	0.002	0.002	0.002	0.0019	0.002	0.002	0.0019	0.002	0.002	0.002	0.002	0.0019	0.0019	0.002	0.002	0.002	0.002	0.002	0.002	0.002	0.002	0.002	0.002	0.002	0.002	0.002	0.002	0.002	0.002	0.002	0.002	0.002	0.002	0.002	0.0021	0.002	0.002	0.002	0.002	0.002	0.002	0.0019	0.0019	0.002
Norvaline 265 (M5)	0.0002	0.0002	0.0002	0.0002	0.0002	0.0002	0.0002	0.0003	0.0002	0.0002	0.0003	0.0002	0.0002	0.0002	0.0002	0.0002	0.0002	0.0002	0.0002	0.0002	0.0002	0.0002	0.0002	0.0002	0.0002	0.0002	0.0002	0.0002	0.0002	0.0002	0.0002	0.0002	0.0002	0.0002	0.0002	0.0002	0.0002	0.0002	0.0002	0.0002	0.0002	0.0002	0.0002	0.0002	0.0002	0.0002	0.0003	0.0002	0.0003
Corrected Data
Norvaline 260 (M0)	0.981383	0.982364	0.983044	0.98196	0.982233	0.97854	0.977087	0.976827	0.987783	0.980164	0.988333	0.988732	0.980336	0.978309	0.97993	0.980705	0.98968	0.99073	0.977767	0.977631	0.976992	0.976954	0.98061	0.979255	0.977396	0.977998	0.976645	0.97709	0.977187	0.97705	0.98061	0.977052	0.977225	0.977532	0.977729	0.977631	0.977727	0.977767	0.977496	0.977667	0.978677	0.978171	0.977727	0.978134	0.979624	0.981556	0.994121	0.991816	0.976383
Norvaline 261 (M1)	0.016467	0.0158044	0.0149728	0.0159016	0.015435	0.0187546	0.0200142	0.0201779	0.0110266	0.0172943	0.00992574	0.00999624	0.0173618	0.0187851	0.0174589	0.0170308	0.00936775	0.00807029	0.0191825	0.0194828	0.0200122	0.0200466	0.0164933	0.0176208	0.0197811	0.01942	0.0201457	0.0197463	0.0196143	0.0199146	0.0166273	0.0197806	0.01958	0.0194809	0.0189489	0.0192149	0.0192168	0.0190486	0.0193813	0.0189127	0.0185883	0.0190854	0.0192168	0.0189857	0.0174238	0.0158648	0.00508428	0.0063376	0.0205773
Norvaline 262 (M2)	0.00286872	0.00265358	0.00264798	0.00293418	0.00301552	0.00367105	0.00403864	0.00388025	0.00178317	0.00345577	0.00183847	0.00179775	0.00314944	0.0038084	0.00356255	0.003068	0.00132308	0.00139895	0.00403304	0.00384458	0.00403825	0.00404384	0.00372004	0.00411857	0.00392073	0.00356952	0.00432488	0.00423231	0.00426331	0.00420734	0.00355696	0.00423793	0.00425769	0.00410918	0.00436485	0.00417075	0.00417116	0.00419613	0.00414537	0.00422627	0.00356392	0.00375244	0.00417116	0.00392111	0.00387412	0.00337787	0.000560362	0.00195881	0.00397277
Norvaline 263 (M3)	-0.000690176	-0.000861432	-0.000663707	-0.000794278	-0.000642599	-0.000899321	-0.00107375	-0.000921311	-0.000580505	-0.000875019	-0.000240735	-0.000504187	-0.000818578	-0.000799066	-0.000911309	-0.000774709	-0.000357841	-0.000139525	-0.000876023	-0.000860248	-0.000942578	-0.000944773	-0.000736926	-0.000905976	-0.00103307	-0.000929596	-0.0010088	-0.000960548	-0.000955176	-0.0010993	-0.000713584	-0.000962744	-0.00095298	-0.00104884	-0.000924901	-0.000906933	-0.00103811	-0.000899365	-0.000914501	-0.000762742	-0.00073185	-0.000943177	-0.00103811	-0.000968717	-0.000838771	-0.000750467	0.000130791	1.08944e-05	-0.000969548
Norvaline 264 (M4)	-5.65738e-05	4.09428e-06	-2.66613e-05	-3.48452e-05	-6.77025e-05	-0.000108128	-0.000118264	-0.000137728	-5.5383e-05	-7.83581e-05	1.24015e-05	-6.07974e-05	-6.46124e-05	-0.000141058	-8.21913e-05	-6.26567e-05	-4.29959e-05	-7.95362e-05	-0.00014902	-0.000139402	-0.00014533	-0.000145484	-0.000120686	-0.00013285	-0.000114132	-0.000100612	-0.000157359	-0.000155102	-0.000157136	-0.000126154	-0.000112947	-0.000155257	-0.000156981	-0.000123749	-0.000164653	-0.000154879	-0.000127811	-0.000156758	-0.000153	-5.61918e-05	-0.000131371	-0.00011008	-0.000127811	-0.00011797	-0.000123162	-8.15234e-05	-2.96342e-05	-0.000139151	-0.000139983
Norvaline 265 (M5)	2.82046e-05	3.50106e-05	2.57138e-05	3.32165e-05	2.65088e-05	4.1947e-05	5.19314e-05	0.000173862	4.2855e-05	3.95621e-05	0.000131198	3.92061e-05	3.56012e-05	3.79861e-05	4.17791e-05	3.31186e-05	3.0174e-05	2.01876e-05	4.26346e-05	4.11052e-05	4.59108e-05	4.60187e-05	3.42767e-05	4.41036e-05	4.94989e-05	4.30069e-05	5.02456e-05	4.75481e-05	4.73912e-05	5.38345e-05	3.24823e-05	4.76562e-05	4.72832e-05	5.10282e-05	4.63313e-05	4.4694e-05	5.07151e-05	4.4429e-05	4.49589e-05	1.25869e-05	3.37092e-05	4.44288e-05	5.07151e-05	4.63311e-05	3.98273e-05	3.32167e-05	0.000132981	1.54786e-05	0.000176572
Atom Percent Enrichment	0.0049769	0.00463592	0.00454275	0.00481193	0.00481686	0.00574156	0.00609929	0.0061559	0.00315747	0.00531683	0.00323252	0.002959	0.00523661	0.00586013	0.00538032	0.00514801	0.0026921	0.00253287	0.00600612	0.00600841	0.00616991	0.0061795	0.00530997	0.00565215	0.00601671	0.00584195	0.00628491	0.00617721	0.00616171	0.00613168	0.00528716	0.00618681	0.00615212	0.00601443	0.00606132	0.00605403	0.00598338	0.00602893	0.00607912	0.00621306	0.00574877	0.0058301	0.00598338	0.00586247	0.00554078	0.00501076	0.00161971	0.00243282	0.00626358
Norvaline 288 (M0)	0.7213	0.7216	0.7232	0.7229	0.7221	0.7202	0.7189	0.7191	0.7257	0.7206	0.7255	0.7251	0.7213	0.7201	0.7207	0.7212	0.726	0.726	0.7199	0.7194	0.7191	0.7192	0.7211	0.721	0.7192	0.7193	0.719	0.7196	0.7191	0.7192	0.721	0.7192	0.7198	0.7196	0.7197	0.7198	0.7193	0.7199	0.7202	0.7198	0.72	0.7199	0.7192	0.7196	0.7211	0.7221	0.7282	0.7268	0.719
Norvaline 289 (M1)	0.1886	0.1885	0.1882	0.188	0.1883	0.1897	0.1903	0.1903	0.1861	0.1894	0.1861	0.1866	0.1886	0.1894	0.1891	0.1888	0.1858	0.1858	0.1896	0.1899	0.19	0.1899	0.189	0.1889	0.1899	0.1898	0.1901	0.1898	0.1899	0.1899	0.1888	0.1899	0.1895	0.1898	0.1897	0.1897	0.1901	0.1897	0.1895	0.1896	0.1896	0.1895	0.19	0.1896	0.1889	0.1882	0.1843	0.1855	0.1901
Norvaline 290 (M2)	0.0752	0.0752	0.0744	0.0746	0.075	0.0754	0.0759	0.0757	0.0735	0.0752	0.0739	0.0739	0.0752	0.0756	0.0753	0.0752	0.0738	0.0738	0.0756	0.0757	0.0759	0.0759	0.075	0.0752	0.0759	0.0759	0.0759	0.0756	0.076	0.0759	0.0753	0.0759	0.0757	0.0757	0.0757	0.0756	0.0757	0.0754	0.0754	0.0757	0.0756	0.0757	0.0759	0.0757	0.0752	0.0749	0.073	0.0732	0.0759
Norvaline 291 (M3)	0.0124	0.0123	0.012	0.0122	0.0123	0.0124	0.0125	0.0125	0.0124	0.0124	0.0122	0.0121	0.0124	0.0125	0.0125	0.0124	0.0122	0.012	0.0125	0.0125	0.0126	0.0125	0.0124	0.0124	0.0126	0.0125	0.0125	0.0125	0.0126	0.0126	0.0124	0.0126	0.0126	0.0125	0.0125	0.0125	0.0125	0.0125	0.0124	0.0125	0.0125	0.0125	0.0125	0.0126	0.0124	0.0124	0.0122	0.0122	0.0126
Norvaline 292 (M4)	0.0022	0.0021	0.002	0.002	0.0021	0.0021	0.0021	0.0022	0.002	0.0021	0.0021	0.0021	0.0022	0.0021	0.0021	0.0021	0.0021	0.0021	0.0021	0.0022	0.0022	0.0022	0.0021	0.0022	0.0022	0.0022	0.0022	0.0022	0.0021	0.0021	0.0022	0.0022	0.0021	0.0021	0.0021	0.0021	0.0022	0.0021	0.0021	0.0021	0.0021	0.0022	0.0021	0.0021	0.0021	0.0021	0.0021	0.0021	0.0022
Norvaline 293 (M5)	0.0003	0.0003	0.0002	0.0003	0.0002	0.0002	0.0003	0.0003	0.0002	0.0003	0.0002	0.0002	0.0003	0.0003	0.0002	0.0002	0.0002	0.0002	0.0003	0.0003	0.0003	0.0003	0.0003	0.0003	0.0003	0.0003	0.0003	0.0003	0.0003	0.0003	0.0003	0.0003	0.0003	0.0003	0.0003	0.0003	0.0003	0.0003	0.0003	0.0003	0.0003	0.0003	0.0003	0.0003	0.0003	0.0003	0.0002	0.0002	0.0002
Norvaline 294 (M6)	0	0	0	0	0	0	0	0	0	0	0	0	0	0	0	0	0	0	0	0	0	0	0	0	0	0	0	0	0	0	0	0	0	0	0	0	0	0	0	0	0	0	0	0	0	0	0	0	0
Corrected Data
Norvaline 288 (M0)	0.989908	0.990318	0.992517	0.992101	0.991009	0.988401	0.986612	0.98679	0.996049	0.988946	0.995676	0.995127	0.989908	0.988259	0.989186	0.989872	0.996263	0.996462	0.987985	0.9873	0.98679	0.987026	0.989731	0.989497	0.986927	0.987163	0.986751	0.987575	0.986886	0.987024	0.989497	0.986927	0.987847	0.987573	0.98771	0.987847	0.987064	0.988084	0.988495	0.987847	0.988023	0.987888	0.987024	0.987672	0.989632	0.991005	0.999382	0.997461	0.986755
Norvaline 289 (M1)	0.00831789	0.00807909	0.00712235	0.00695384	0.0076359	0.010189	0.0114499	0.0113801	0.00341327	0.00964431	0.00348162	0.00429777	0.00831789	0.00981602	0.00920366	0.00862462	0.00290234	0.00290292	0.0101562	0.0107352	0.0109729	0.0108039	0.00893047	0.00882818	0.0108028	0.0106338	0.0111441	0.0105308	0.0108382	0.0108039	0.00869243	0.0108028	0.0100548	0.0105308	0.0103607	0.0103263	0.01104	0.010293	0.00991843	0.0101906	0.0101209	0.0100195	0.0109396	0.0102603	0.00879382	0.00750011	0.00011075	0.00222062	0.0111441
Norvaline 290 (M2)	0.00239102	0.00240801	0.00134851	0.00169759	0.0021786	0.00235893	0.00290255	0.00262338	0.000693316	0.00216718	0.00124074	0.0010989	0.00239102	0.00273018	0.00239406	0.00233142	0.00117799	0.00117823	0.00267551	0.00273814	0.00298942	0.00301706	0.00200297	0.00230902	0.00301675	0.00304439	0.00296239	0.00262602	0.00315651	0.00301705	0.00247581	0.00301675	0.00284747	0.0027603	0.00278763	0.00264818	0.00267804	0.00237467	0.00242417	0.00281497	0.00267007	0.00284202	0.00298455	0.00282559	0.00230385	0.00207681	0.000477621	0.000428536	0.0029624
Norvaline 291 (M3)	-0.000690767	-0.000811383	-0.000911892	-0.000703438	-0.000727805	-0.000837044	-0.000919751	-0.000853768	6.67845e-05	-0.000750244	-0.00032619	-0.000495355	-0.000690767	-0.000751458	-0.000629527	-0.000704021	-0.000267815	-0.000533564	-0.00076689	-0.00082524	-0.000765944	-0.000891139	-0.000655797	-0.000713916	-0.000758229	-0.000883423	-0.000906571	-0.000784574	-0.000791252	-0.000758303	-0.000739149	-0.000758229	-0.00066154	-0.000815272	-0.000807556	-0.000774606	-0.000838338	-0.000711029	-0.000826192	-0.00079984	-0.000764563	-0.000792046	-0.000896602	-0.000671573	-0.000711664	-0.000558803	0.000109247	-4.92454e-05	-0.00077374
Norvaline 292 (M4)	7.66676e-06	-9.65791e-05	-9.97079e-05	-0.000173767	-8.87894e-05	-0.000112795	-0.000159098	-1.59632e-05	-0.000206075	-0.000107301	-4.00085e-05	-7.60755e-07	7.66676e-06	-0.000159832	-0.000148357	-0.000119539	-4.01199e-05	1.7739e-05	-0.000155757	-2.42444e-05	-6.28669e-05	-3.59803e-05	-0.000103855	1.37795e-05	-6.49043e-05	-3.80179e-05	-3.19052e-05	-2.0414e-05	-0.000202176	-0.000196308	5.87394e-06	-6.49043e-05	-0.000192722	-0.00015755	-0.000159587	-0.000153719	-2.00379e-05	-0.000142127	-0.00011714	-0.000161625	-0.000155612	-3.22621e-05	-0.000165211	-0.000190833	-0.000117489	-0.000114148	-2.38732e-05	-1.11582e-05	-6.08359e-05
Norvaline 293 (M5)	0.000110641	0.000143347	3.96806e-05	0.000161866	8.3589e-06	1.48927e-05	0.000151616	0.000120027	-8.92435e-06	0.000139814	-1.55966e-05	-8.41267e-06	0.000110641	0.000142697	5.36716e-06	8.27444e-06	-1.86772e-05	-6.70079e-06	0.000143219	0.000119105	0.000117746	0.000123487	0.000134513	0.000111424	0.000117486	0.000123226	0.000124008	0.000116654	0.000146884	0.000144693	0.000113354	0.000117486	0.000139269	0.000145931	0.00014567	0.00014348	0.000119505	0.000139221	0.00014458	0.00014541	0.000143095	0.000117941	0.000150834	0.000139653	0.00013851	0.000130113	-4.00075e-05	-3.24968e-05	-1.19575e-05
Norvaline 294 (M6)	-4.49099e-05	-4.05341e-05	-1.56055e-05	-3.6782e-05	-1.48968e-05	-1.3674e-05	-3.71962e-05	-4.38289e-05	-6.87179e-06	-3.94781e-05	-1.64913e-05	-1.9042e-05	-4.49099e-05	-3.67607e-05	-1.11919e-05	-1.30638e-05	-1.63455e-05	-2.0381e-05	-3.69742e-05	-4.34053e-05	-4.11418e-05	-4.30551e-05	-3.94042e-05	-4.52302e-05	-4.10351e-05	-4.29483e-05	-4.32686e-05	-4.34737e-05	-3.45772e-05	-3.47523e-05	-4.49483e-05	-4.10351e-05	-3.46755e-05	-3.70126e-05	-3.69059e-05	-3.7081e-05	-4.36154e-05	-3.7434e-05	-3.92375e-05	-3.67991e-05	-3.69715e-05	-4.2975e-05	-3.68759e-05	-3.47848e-05	-3.89443e-05	-3.87223e-05	-1.61457e-05	-1.70766e-05	-1.54776e-05
Atom Percent Enrichment	0.0023223	0.00215828	0.00137665	0.0016706	0.00189926	0.0024038	0.00292349	0.00292037	0.000826266	0.00239956	0.0009493	0.000992879	0.0023223	0.00261923	0.00230732	0.00214772	0.000840203	0.000739227	0.00265993	0.00284687	0.00299824	0.00292762	0.00224523	0.00238334	0.00297789	0.00290727	0.00296832	0.00278614	0.00294064	0.00290026	0.00240337	0.00297789	0.00273812	0.002741	0.00272065	0.00268027	0.00287968	0.00260737	0.00250851	0.0027003	0.00265207	0.00275761	0.00286245	0.00276633	0.00229782	0.00203426	0.000219641	0.000544568	0.00288892
[truncated: 206 more columns]
